# Supplementary material for: Virtual reality for relatives of ICU patients to improve psychological sequelae: study protocol for a multicentre, randomised controlled trial
Source: PubMed Central journal article supplement — BMJ Open. 2021 Sep 28;11(9):e049704. doi: 10.1136/bmjopen-2021-049704 (PMC8479939; doi:10.1136/bmjopen-2021-049704), 2021-09-28
Supplement: bmjopen-2021-049704.draft_revisions.pdf [file bmjopen-2021-049704.draft_revisions.pdf]

# BMJ Open

BMJ Open is committed to open peer review. As part of this commitment we make the peer review history of every article we publish publicly available.

When an article is published we post the peer reviewers' comments and the authors' responses online. We also post the versions of the paper that were used during peer review. These are the versions that the peer review comments apply to.

The versions of the paper that follow are the versions that were submitted during the peer review process. They are not the versions of record or the final published versions. They should not be cited or distributed as the published version of this manuscript.

BMJ Open is an open access journal and the full, final, typeset and author-corrected version of record of the manuscript is available on our site with no access controls, subscription charges or pay-per-view fees (<http://bmjopen.bmj.com>).

If you have any questions on BMJ Open's open peer review process please email [info.bmjopen@bmj.com](mailto:info.bmjopen@bmj.com)

# BMJ Open

## Virtual reality for relatives of ICU patients to improve psychological sequelae: study protocol for a multicentre, randomized controlled trial.

|                               |                                                                                                                                                                                                                                                                                                                                                                                                                                                                                                                                                                                                                                                                                                                                                                             |
|-------------------------------|-----------------------------------------------------------------------------------------------------------------------------------------------------------------------------------------------------------------------------------------------------------------------------------------------------------------------------------------------------------------------------------------------------------------------------------------------------------------------------------------------------------------------------------------------------------------------------------------------------------------------------------------------------------------------------------------------------------------------------------------------------------------------------|
| Journal:                      | <i>BMJ Open</i>                                                                                                                                                                                                                                                                                                                                                                                                                                                                                                                                                                                                                                                                                                                                                             |
| Manuscript ID                 | bmjopen-2021-049704                                                                                                                                                                                                                                                                                                                                                                                                                                                                                                                                                                                                                                                                                                                                                         |
| Article Type:                 | Protocol                                                                                                                                                                                                                                                                                                                                                                                                                                                                                                                                                                                                                                                                                                                                                                    |
| Date Submitted by the Author: | 30-Jan-2021                                                                                                                                                                                                                                                                                                                                                                                                                                                                                                                                                                                                                                                                                                                                                                 |
| Complete List of Authors:     | Vlake, Johan; Erasmus Medical Center, Intensive Care; Franciscus Gasthuis en Vlietland, Intensive Care<br>van Bommel, Jasper; Erasmus MC, Department of Intensive Care<br>Wils, Evert-Jan; Franciscus Gasthuis en Vlietland, Intensive Care<br>Korevaar, Tim; Erasmus Universiteit Rotterdam<br>Hellemons, Merel; Erasmus Medical Center, Pulmonology<br>Klijn, Eva; Erasmus MC, Department of Intensive Care<br>Schut, Anna; Ikazia Hospital, Intensive Care<br>Labout, Joost; Maastad Hospital, Intensive Care<br>Van Bavel, Marten; Erasmus MC, Department of Intensive Care<br>Van Mol, Margo; Erasmus Universiteit Rotterdam, Intensive Care Adults<br>Gommers, Diederik; Erasmus MC, Intensive Care<br>Van Genderen, Michel; Erasmus MC, Department of Intensive Care |
| Keywords:                     | INTENSIVE & CRITICAL CARE, Adult intensive & critical care <<br>INTENSIVE & CRITICAL CARE, MENTAL HEALTH, Clinical trials <<br>THERAPEUTICS                                                                                                                                                                                                                                                                                                                                                                                                                                                                                                                                                                                                                                 |
|                               |                                                                                                                                                                                                                                                                                                                                                                                                                                                                                                                                                                                                                                                                                                                                                                             |

SCHOLARONE™  
Manuscripts

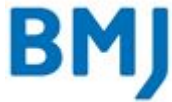

I, the Submitting Author has the right to grant and does grant on behalf of all authors of the Work (as defined in the below author licence), an exclusive licence and/or a non-exclusive licence for contributions from authors who are: i) UK Crown employees; ii) where BMJ has agreed a CC-BY licence shall apply, and/or iii) in accordance with the terms applicable for US Federal Government officers or employees acting as part of their official duties; on a worldwide, perpetual, irrevocable, royalty-free basis to BMJ Publishing Group Ltd ("BMJ") its licensees and where the relevant Journal is co-owned by BMJ to the co-owners of the Journal, to publish the Work in this journal and any other BMJ products and to exploit all rights, as set out in our [licence](#).

The Submitting Author accepts and understands that any supply made under these terms is made by BMJ to the Submitting Author unless you are acting as an employee on behalf of your employer or a postgraduate student of an affiliated institution which is paying any applicable article publishing charge ("APC") for Open Access articles. Where the Submitting Author wishes to make the Work available on an Open Access basis (and intends to pay the relevant APC), the terms of reuse of such Open Access shall be governed by a Creative Commons licence – details of these licences and which [Creative Commons](#) licence will apply to this Work are set out in our licence referred to above.

Other than as permitted in any relevant BMJ Author's Self Archiving Policies, I confirm this Work has not been accepted for publication elsewhere, is not being considered for publication elsewhere and does not duplicate material already published. I confirm all authors consent to publication of this Work and authorise the granting of this licence.

1  
2  
3  
4 1 **Virtual reality for relatives of ICU patients to improve psychological**  
5  
6  
7  
8 2 **sequelae: study protocol for a multicentre, randomized controlled trial.**  
9

10  
11 3 Johan H. Vlaker, BSc<sup>1,2</sup>; Jasper Van Bommel, MD, PhD<sup>1</sup>; Evert-Jan Wils, MD, PhD<sup>2</sup>; Tim I.M. Korevaar,  
12  
13  
14 4 MD, PhD<sup>3,4</sup>; Merel E. Hellemons, MD, PhD<sup>5</sup>; Eva Klijn, MD, PhD<sup>1</sup>; Anna F.C. Schut, MD, PhD<sup>6</sup>; Joost  
15  
16  
17 5 A.M. Labout, MD, PhD<sup>7</sup>; Marten P. van Bavel, BSc<sup>1</sup>; Margo M.C. van Mol, PhD<sup>1</sup>; Diederik Gommers,  
18  
19  
20 6 MD, PhD<sup>1</sup>; Michel E. van Genderen, MD, PhD<sup>1</sup>.

21  
22  
23  
24  
25 7 <sup>1</sup> Department of Intensive Care, Erasmus Medical Centre, Rotterdam, the Netherlands

26  
27 8 <sup>2</sup> Department of Intensive Care, Franciscus Gasthuis & Vlietland, Rotterdam, the Netherlands

28  
29  
30 9 <sup>3</sup> Department of Internal Medicine, Erasmus Medical Centre, Rotterdam, the Netherlands

31  
32  
33 10 <sup>4</sup> Academic Centre for Thyroid Diseases, Erasmus Medical Centre, Rotterdam, the Netherlands

34  
35  
36 11 <sup>5</sup> Department of Pulmonology Medicine, Erasmus Medical Centre, Rotterdam, the Netherlands

37  
38  
39 12 <sup>6</sup> Department of Intensive Care, Ikazia Hospital, Rotterdam, the Netherlands

40  
41  
42 13 <sup>7</sup> Department of Intensive Care, Maasstad Hospital, Rotterdam, the Netherlands

43  
44  
45  
46 14 **Corresponding author:**

47  
48  
49 15 Michel van Genderen

50  
51  
52 16 [M.vanGenderen@erasmusmc.nl](mailto:M.vanGenderen@erasmusmc.nl)

53  
54  
55 17 Tel.: +31 10 704 0 704

56  
57  
58 18 ORCID: 0000-0001-5668-3435

1  
2  
3  
4  
5  
6  
7  
8  
9  
10  
11  
12  
13  
14  
15  
16  
17  
18  
19  
20  
21  
22  
23  
24  
25  
26  
27  
28  
29  
30  
31  
32  
33  
34  
35  
36  
37  
38  
39  
40  
41  
42  
43  
44  
45  
46  
47  
48  
49  
50  
51  
52  
53  
54  
55  
56  
57  
58  
59  
60

19 Department of Intensive Care

20 Erasmus Medical Centre

21 Doctor Molewaterplein 40

22 3015 GD Rotterdam, the Netherlands

23 **Word count:** 2911 words

For peer review only

1  
2  
3 24 **ABSTRACT**  
4  
5

6 25 **Introduction** Intensive Care Unit (ICU) admission of a relative might lead to psychological distress  
7  
8  
9 26 and complicated grief (post-intensive care syndrome-family; PICS-F). Evidence suggests that  
10  
11  
12 27 increased distress during ICU stay increases risk of PICS-F, resulting in difficulty returning to their  
13  
14  
15 28 normal lives after the ICU experience. Effective interventions to improve PICS-F are currently lacking.  
16  
17  
18 29 In the present trial, we hypothesized that information provision using Intensive Care Unit-specific Virtual  
19  
20  
21 30 Reality for Family members/relatives (ICU-VR-F) may improve understanding of ICU and subsequently  
22  
23  
24 31 improve psychological well-being and quality of life in relatives of patients admitted to the ICU.  
25  
26

27 32 **Methods and analysis** This multicentre, clustered randomized controlled trial will be conducted from  
28  
29  
30 33 January to December, 2021, in the mixed medical-surgical ICUs of four hospitals in Rotterdam, the  
31  
32  
33 34 Netherlands. We aim to include adult relatives of 160 ICU patients, with an expected ICU length-of-stay  
34  
35  
36 35 over 72 hours. Participants will be randomized clustered per patient in a 1:1 ratio to either the  
37  
38  
39 36 intervention or control group. Participants allocated to the intervention group will receive ICU-VR-F, an  
40  
41  
42 37 information module that can be watched in VR, while the control group will receive usual care. Initiation  
43  
44  
45 38 of ICU-VR-F will be during their hospital visit, unless participants cannot visit the hospital due to COVID-  
46  
47  
48 39 19 regulations, than VR can be watched digitally. The primary objective is the effect of ICU-VR-F on  
49  
50  
51 40 psychological well-being and quality of life up to 6 months after ICU discharge of the patient. The  
52  
53  
54 41 secondary outcome is the degree of understanding of ICU treatment and ICU modalities.  
55

56 42 **Ethics and dissemination** The Medical Ethics Committee of the Erasmus Medical Centre,  
57  
58  
59 43 Rotterdam, the Netherlands, approved the study, and local approval was obtained from each  
60

1  
2  
3 44 participating centre (NL73670.078.20). Our findings will be disseminated by presentation of the results  
4  
5

6 45 at (inter)national conferences and publication in scientific, peer-reviewed journals.  
7  
8

9 46 **Trial registration number** This trial has been prospectively registered on the Netherlands Trial  
10  
11

12 47 Register (TrialRegister.nl, NL9220, registered January 25, 2021).  
13  
14  
15  
16  
17  
18  
19  
20  
21  
22  
23  
24  
25  
26  
27  
28  
29  
30  
31  
32  
33  
34  
35  
36  
37  
38  
39  
40  
41  
42  
43  
44  
45  
46  
47  
48  
49  
50  
51  
52  
53  
54  
55  
56  
57  
58  
59  
60

For peer review only

1  
2  
3 **48 Strengths and limitations of this study**  
4  
5

- 6 49 • A randomized controlled trial examining the effect of an intensive care unit-specific virtual reality  
7  
8  
9 50 intervention for family members/relatives (ICU-VR-F) on psychological well-being and quality of life  
10  
11  
12 51 using an innovative and uniform modality.  
13  
14  
15 52 • ICU-VR-F represents an easy applicable, safe, and immersive modality to improve communication  
16  
17  
18 53 through better information provision regarding treatment- and environment-related information  
19  
20  
21 54 about the ICU, enabling relatives to receive uniform and complete information.  
22  
23  
24 55 • ICU-VR-F is an innovative method that is generalizable and makes information easy accessible and  
25  
26  
27 56 immersive.  
28  
29  
30 57 • Blinding of patients or investigators is not possible due to the nature of the intervention.  
31  
32  
33  
34  
35  
36  
37  
38  
39  
40  
41  
42  
43  
44  
45  
46  
47  
48  
49  
50  
51  
52  
53  
54  
55  
56  
57  
58  
59  
60



## 58 INTRODUCTION

59 An Intensive Care Unit (ICU) admission is known to be a stressful experience for both the patient and  
60 its relatives. As a result, relatives of ICU patients are at risk of developing several psychological  
61 symptoms, such as symptoms of post-traumatic stress disorder (PTSD), anxiety, depression, and  
62 complicated grief in the unfortunate event of a patient dying during ICU treatment. These impairments  
63 are collectively referred to as the Post-Intensive Care Syndrome Family (PICS-F).<sup>1-3</sup>  
64 PICS-F frequently results in loss of employment, financial burden, lifestyle interference, and a profound  
65 impact on quality of life.<sup>4</sup> These consequences often last a long time and already start during ICU stay  
66 of their kin.<sup>5</sup> Important risk factors for the development of PICS-F are the unexpectedness of critical  
67 illness, the dramatic nature of the relatives' experience leading to emotional upset, the level of  
68 communication of the ICU staff, and the use medical jargon, that frequently makes it hard for the relative  
69 to understand the treatment explanation.<sup>6-11</sup> As such, relatives may witness invasive treatments with  
70 unfamiliar medical procedures and devices in an environment they do not understand. Therefore,  
71 communication between ICU staff and families is essential in the care process, and good communication  
72 and information provision improves the relatives' understanding of ICU treatment, satisfaction, limit  
73 lawsuits, and is associated with lower prevalence of PTSD during the ICU stay.<sup>12-14</sup> As such, good  
74 information provision to relatives of ICU patients is essential in improving the relatives' comprehension  
75 of ICU procedures and ICU surrounding during the ICU stay.

76 During the COVID-19 pandemic, many hospitals worldwide disallowed visitors for all adult inpatients  
77 including all COVID-19 and non-COVID ICU patients. Relatives of ICU COVID-19 patients are therefore

1  
2  
3 78 confronted with the impracticableness of visiting their relative in the ICU or to receive good  
4  
5  
6 79 communication from the ICU staff. In the face of mounting the increase in PICS-F-related sequelae,  
7  
8  
9 80 several interventions, such as information brochures, family conferences, and educational programs for  
10  
11  
12 81 relatives, have been tested, but did not result in a clinically meaningful improvement in psychological  
13  
14  
15 82 well-being or quality of life.<sup>15 16</sup> The COVID-19 pandemic has resulted in the disruption of an integral  
16  
17  
18 83 aspect of care in most ICUs across the world and the importance of generalizable and on demand  
19  
20  
21 84 information has been addressed. To date, a clinically meaningful, simple and generalizable intervention  
22  
23  
24 85 remains unavailable.

25  
26  
27 86 Virtual Reality (VR) is a relatively new technique that allows the user to fully immerse within a virtual  
28  
29  
30 87 environment. As such, it allows relatives to experience what the patient is experiencing during ICU  
31  
32  
33 88 treatment, possibly leading to a better comprehension of ICU stay. VR has been demonstrated to be an  
34  
35  
36 89 appropriate tool to deliver additional information to increase patient satisfaction and reduce preoperative  
37  
38  
39 90 stress.<sup>17</sup> Additionally, exposure through VR appears to be an effective treatment modality for several  
40  
41  
42 91 mental health disorders, including PTSD, depression, and anxiety, in a non-ICU setting.<sup>18-21</sup> It provides  
43  
44  
45 92 an innovative modality that is generalizable and could improve the relatives' understanding of what is  
46  
47  
48 93 happening to long-stay ICU patients, without increasing staff workload. We hypothesized that offering  
49  
50  
51 94 treatment- and environment-related information about the ICU via VR increases relatives' understanding  
52  
53  
54 95 of ICU treatment and environment and improves psychological well-being and quality of life.

1  
2  
3 96 **METHODS AND ANALYSIS**  
4

5 97 **Study design and setting**  
6  
7

8 98 This study will be a multicentre, clustered randomized trial conducted in the mixed medical-surgical ICUs  
9  
10  
11 99 of four hospitals in Rotterdam, the Netherlands. Cooperating hospitals are: the Erasmus MC (university  
12  
13  
14 100 hospital), Franciscus Gasthuis & Vlietland hospital, Ikazia hospital and Maastad hospital (all teaching  
15  
16  
17 101 hospitals). The Medical Ethics Committee of the Erasmus MC approved this study (NL73670.078.20,  
18  
19  
20 102 approved December 14, 2020), and local approval was obtained from each participating centres'  
21  
22  
23 103 institutional ethic review board. The study will be conducted from January to December 2021.  
24  
25  
26 104 Participants will be followed for 6 months after patient's ICU discharge. Any modifications to the study  
27  
28  
29 105 protocol, which may impact the conduct of the study or participant safety, including changes of the study  
30  
31  
32 106 objectives, study design, study population, sample size, study procedures or significant administrative  
33  
34  
35 107 aspects, will be sent for approval to the Medical Ethics Committee of the Erasmus MC prior to  
36  
37  
38 108 implementation, and the health authorities will be informed in accordance with local regulations.  
39

40  
41 109 **Study participants**  
42

43  
44 110 We aim to include relatives, or close friends in absence of relatives, of 160 ICU patients. Relatives  $\geq 18$   
45  
46  
47 111 years of age, who are a first/second degree relative of the ICU patient, are responsible for decision  
48  
49  
50 112 making, or sharing the same household are eligible for inclusion. Multiple relatives per patient can  
51  
52  
53 113 participate. In this case, they will be clustered to the same randomization allocation. Relatives with no  
54  
55  
56 114 formal address, unable to understand the Dutch language, not in possession of a smartphone or tablet  
57  
58  
59 115 to watch ICU-VR-F at home, or relatives of patients with an expected ICU-LOS less than 72 hours will  
60

1  
2  
3 116 be excluded. Close friends are eligible for inclusion in the case that no relative is available. Close friends  
4  
5  
6 117 are considered close friends if they address themselves as close friends and are responsible for decision  
7  
8  
9 118 making.

### 119 **Intervention**

120 An interdisciplinary team of three intensivists, a psychologist, and a VR/film director designed an  
121 Intensive Care Unit-specific Virtual Reality for relatives (ICU-VR-F) of ICU patients. Based on these  
122 focus group meetings and previous studies, the following information was included in the module: 1) an  
123 introduction by an intensivist and an ICU nurse to welcome the relative to the ICU and VR environment  
124 explaining daily movements at an ICU, 2) explanation of monitors and noises in an ICU room, 3)  
125 information regarding mechanical ventilation, intubation and tracheal tube suction, 5) necessity of  
126 central/peripheral lines and IV/drips, 6) information and necessity of the treatment team and ICU  
127 workflow.<sup>22 23</sup> The ICU-specific VR module was designed with the aim to show relevant and truthful  
128 treatment- and ICU environment-related information . The point of view for the camera was the field of  
129 vision of the mock patient lying in a hospital bed.

### 130 **Study procedures**

131 Outcome variables will be collected at each time point, see *Figure 1*. Relatives or close friends will be  
132 approached by an investigator of the research team within 2 days after ICU admission. After inclusion,  
133 they will receive a first set of questionnaires (T0), consisting of a self-composed questionnaire regarding  
134 demographics, psychological well-being , and quality of life. Participants are asked to fill in the first set  
135 of questionnaires retrospectively, in order to obtain a measure of participant's anxiety and depression

1  
2  
3 136 levels and quality of life prior to the current episode of the patient's illness leading to ICU admission.  
4  
5

6 137 Hereafter, randomization will be done.  
7  
8

9 138 After randomization, participants in the intervention group will receive ICU-VR using head-mounted  
10  
11

12 139 display VR (Oculus Go, Irvine, CA, CE: R-CMM-OC8-MH-A). Thereafter, they receive cardboard VR  
13  
14

15 140 glasses and an access link to watch ICU-VR-F at home, which can also be used without the cardboard  
16  
17

18 141 VR glasses. Participants who are not allowed to visit the hospital due to COVID-19 regulations, i.e.,  
19  
20

21 142 mandatory self-quarantine, inability to visit the ICU, or a limited number of visitors, will only receive ICU-  
22  
23

24 143 VR-F using cardboard VR glasses via the access link. The number of times a participant watches ICU-  
25  
26

27 144 VR-F will be logged. Participants have access to the module during the entire study period, including  
28  
29

30 145 follow-up. Participants will receive a second set of questionnaires during ICU discharge of their relative  
31  
32

33 146 to assess their understanding of ICU procedures and environment, and will receive follow-up  
34  
35

36 147 questionnaires at 1 month, 3 months, and 6 months after ICU discharge (*Table 1*).  
37  
38

39 148 The study procedures of participants in the intervention group who are allowed to visit the hospital are  
40  
41

42 149 presented in *Figure 2* and for those who are not allowed to visit the hospital in *Figure 3*.  
43  
44

#### 45 150 **Randomization and masking**

46  
47

48 151 Randomization will be on a 1:1 ratio, clustered based on the ICU patient (i.e., if multiple relatives of one  
49  
50

51 152 ICU patient participate, they will all be randomized to the same group), stratified for study site and the  
52  
53

54 153 ability to visit the hospital with regard to COVID-19 regulations. Randomization will be performed using  
55  
56  
57  
58  
59  
60

1  
2  
3 154 a centralized internet-based randomization procedure (Castor EDC, Amsterdam, the Netherlands). Due  
4  
5  
6 155 to the nature of the intervention, blinding is not possible.  
7  
8  
9

## 10 156 **Outcomes and measurements**

11  
12  
13 157 The primary endpoint is the effect of ICU-VR-F on psychological well-being and quality of life in  
14  
15  
16 158 participants up to six months after ICU discharge. Psychological well-being will be expressed as the  
17  
18  
19 159 presence and severity of PTSD-, anxiety-, and depression-related symptoms, and will be assessed  
20  
21  
22 160 using the Impact of Event Scale-Revised (IES-R) and Hospital Anxiety and Depression Scale (HADS).<sup>24</sup>  
23  
24  
25 161 <sup>25</sup> Quality of life will be assessed using the RAND-36.<sup>26</sup> The secondary endpoint is the participants'  
26  
27  
28 162 understanding of ICU procedures, i.e., monitors, sounds and daily work practice. Understanding of ICU  
29  
30  
31 163 procedures will be assessed using a subset of the Consumer Quality Index – Relatives in the ICU (CQI-  
32  
33  
34 164 Relatives in the ICU).<sup>27</sup> Additional outcomes are adequate understanding about the ICU environment  
35  
36  
37 165 and procedures (devices, treatment team, alarm noises, procedures) and the perspectives of  
38  
39  
40 166 participants about ICU-VR-F, assessed using the Caregivers Strain Index (CSI), a self-composed  
41  
42  
43 167 'perceived stress factors' questionnaire, and a self-composed 'perspectives on the ICU-VR intervention'  
44  
45  
46 168 questionnaire.

47  
48 169 The IES-R comprises 22 items, assesses subjective distress caused by a traumatic event, and has been  
49  
50  
51 170 previously validated in ICU survivors.<sup>28</sup> The IES-R yields a total score (ranging from 0 to 88, with higher  
52  
53  
54 171 scores indicating more severe symptoms), and subscale scores can be calculated for symptoms of  
55  
56  
57 172 intrusion, avoidance and hyperarousal. An IES-R sum score  $\geq 24$  will be considered as PTSD.<sup>29 30</sup>  
58  
59  
60

1  
2  
3 173 The HADS comprises 14 items and is commonly used to determine the levels of anxiety and depression  
4  
5  
6 174 that a person is experiencing. A sum score > 8 on either the depression (7 questions) or anxiety (7  
7  
8  
9 175 questions) subscale will be classified as depression and anxiety, respectively.<sup>24 31 32</sup>  
10  
11  
12 176 The RAND-36 consists of 8 scaled scores, which are the weighted sums of the questions in their section.  
13  
14  
15 177 Each scale is directly transformed to a scale ranging from 0 to 100 on the assumption that each question  
16  
17  
18 178 carries an equal weight. The 8 sections are vitality, physical functioning, bodily pain, general health  
19  
20  
21 179 perception, physical role functioning, emotional role functioning, social role functioning and mental  
22  
23  
24 180 health. In addition, a mental- and physical component scale can be calculated, giving a perception of a  
25  
26  
27 181 person's physical and mental health.<sup>26</sup>  
28  
29  
30 182 The CQI-Relatives in the ICU was designed by the Healthcare Institute of the Netherlands in  
31  
32  
33 183 collaboration with several hospitals to measure the perceived quality of care by relatives of ICU  
34  
35  
36 184 patients.<sup>27</sup> The subset used in the present study was carefully tailored to the needs of the current study.  
37  
38  
39 185 Therefore, unnecessary items for this study were removed, and additional VR-specific questions were  
40  
41  
42 186 added. The subset consists of 38 items, distributed across 4 sections; 1) general questions, 2) questions  
43  
44  
45 187 regarding information provision and understanding of the ICU environment, 3) questions regarding care  
46  
47  
48 188 offered to relatives and 4) questions regarding the communication with the ICU staff.  
49  
50  
51 189 The self-composed perceived stress factors questionnaire was based on existing literature regarding  
52  
53  
54 190 risk factors for the development of PICS-F, including time spent for visitation, worries about the physical,  
55  
56  
57 191 cognitive and psychological state of the patient, worries about family and familiarity with an ICU. The  
58  
59  
60 192 final questionnaire comprises 18 questions ranging from 0 (Not at all) to 4 (A lot) on a Likert scale.

1  
2  
3 193 The self-composed perspectives on the ICU-VR intervention questionnaire comprises 13 questions.  
4  
5  
6

7 194 **Data management**  
8  
9

10 195 Data will be uploaded, stored, and maintained on the electronic data capture system of Castor (Castor  
11  
12  
13 196 EDC, [www.castoredc.com](http://www.castoredc.com), Amsterdam, the Netherlands). The study team will be responsible for all data  
14  
15  
16 197 entry and quality control activities. The data will be checked by at least two persons from the study team  
17  
18  
19 198 and will be stored for at least 15 years on either the Castor EDC server or as a hardcopy in the ICUs of  
20  
21  
22 199 the participating hospitals. Questionnaires will be sent digitally using Castor EDC or hardcopy via postal  
23  
24  
25 200 mail whenever requested.  
26

27 201 To maintain anonymity, data will be coded with a number and this number will be the only reference to  
28  
29  
30 202 identification. The principal investigator is the only one in possession of the translation key, making it  
31  
32  
33 203 impossible to link data to the participant.  
34  
35

36 204 **Sample size calculation**  
37  
38

39 205 To the best of our knowledge, this study will be the first of its kind for which no previous conducted  
40  
41  
42 206 studies can be used to define the expected effect estimate. Due to expected non-normality of PTSD,  
43  
44  
45 207 depression, and anxiety scores at 6 months after ICU discharge, this calculation could represent an  
46  
47  
48 208 overestimation of the effect estimate. Based on our clinical experience, and experience with a pilot study  
49  
50  
51 209 studying the effects of ICU-VR on ventilated ICU patients for which we found Cohen's  $d$  effect size of  
52  
53  
54 210 0.77, we expect that a clinically meaningful Cohen's  $d$  effect size of 0.55 could be expected in relatives.<sup>23</sup>  
55  
56  
57 211 When taking this into account, using a two-sided alpha of 0.05, and a power of 0.80, assuming an  
58  
59  
60



1  
2  
3 212 expected loss-to-follow-up of 20%, we aim to include relatives of 160 ICU patients. We expect a needed  
4  
5  
6 213 time of six months on the admission rate history of the participating hospitals.  
7  
8

9  
10 214 **Statistical analysis**  
11

12  
13 215 Baseline demographics and treatment-related characteristics will be quantified using descriptive  
14  
15  
16 216 statistics. Continuous variables will be presented as mean (SD) or as median (95% range), based on  
17  
18  
19 217 the distribution of the variable. Categorical variables will be presented as absolute number and relative  
20  
21  
22 218 frequency.  
23

24  
25 219 A sensitivity analysis will be performed in which missing data (completely) at random will be dealt with  
26  
27  
28 220 utilizing both multiple imputation according to the Markov-chain Monte Carlo and the Last Observation  
29  
30  
31 221 Carried Forward Method.<sup>33 34</sup> We will correct for multiple testing using the false discovery rate with a  
32  
33  
34 222 maximum of 5% false negatives.<sup>35</sup>  
35

36  
37 223 For the primary outcome, the effect of ICU-VR on PTSD, anxiety, depression, and quality of life, we will  
38  
39  
40 224 analyse differences in the IES-R sum score (PTSD), the HADS anxiety- and depression score, and the  
41  
42  
43 225 RAND-36 subscales (quality of life) between participants in the intervention and the control group at  
44  
45  
46 226 each follow-up time-point (e.g., 1 month, 3 months, and 6 months after ICU discharge) using a mixed  
47  
48  
49 227 effect linear regression model with a random intercept for each study site and/or participants based on  
50  
51  
52 228 model comparisons using the Akaike information criteria. In case of multiple participants for one ICU  
53  
54  
55 229 patient, these participants will be considered as clustered, and a random intercept for each cluster will  
56  
57  
58 230 be used. Between-group differences in variables of interest throughout follow-up were studied by  
59  
60 231 introducing the product of time\*treatment group to the model.

1  
2  
3 232 Differences in the proportion of participants in the intervention group and participants in the control group  
4  
5  
6 233 with clinically relevant symptoms of PTSD (IES-R sum score  $\geq 22$ ), depression (HADS depression score  
7  
8  
9 234  $> 8$ ) or anxiety (HADS anxiety score  $> 8$ ) will be analysed using a mixed effect logistic regression model.  
10  
11  
12 235 Also, changes from baseline will be computed dividing the parameter value at specific time points into  
13  
14  
15 236 the baseline value expressed as percentile changes (% of baseline). The magnitude of change among  
16  
17  
18 237 PTSD, depression, and anxiety at specific time points and differences will be tested using a mixed effect  
19  
20  
21 238 linear regression model.  
22  
23  
24 239 For the secondary outcome, understanding of the ICU and quality of care in the ICU, we will analyse  
25  
26  
27 240 differences between study groups per question using a mixed effect logistic regression model. By  
28  
29  
30 241 combining the numeric values of the answers given, a sum score and subscales for the different sections  
31  
32  
33 242 can be calculated for each participant. The association between the intervention and these sum scores  
34  
35  
36 243 will be examined using mixed effect linear regression models.  
37  
38  
39 244 The explorative outcomes, the perceived stress factors and the perspectives of relatives on the ICU-  
40  
41  
42 245 VR-F intervention, will be described using descriptive statistics. Differences in continuous outcomes of  
43  
44  
45 246 the self-composed questionnaire regarding perceived stress factors and the sum score of the CSI will  
46  
47  
48 247 be analysed using mixed effect linear regression models. Differences in categorical outcomes of the  
49  
50  
51 248 self-composed questionnaire regarding perceived stress factors will be analysed using mixed effect  
52  
53  
54 249 logistic regression models.  
55  
56  
57 250 In analysis, participants will be stratified on the ability to watch the intervention within the hospital to  
58  
59  
60 251 address possible difference in effectiveness. All data will be gathered using Castor EDC (Castor EDC,

1  
2  
3 252 Amsterdam, the Netherlands). Analyses will be performed using SPSS (version 27.0; SPSS Inc.,  
4  
5  
6 253 Chicago, IL) and R for Statistics (R Foundation for Statistical Computing, Vienna, Austria, 2015). A *P*-  
7  
8  
9 254 value  $\leq 0.05$  will be considered statistically significant.

### 255 **Ethics and dissemination**

256 This study will be conducted in accordance with the principles of the Declaration of Helsinki (version  
257 October 2013; www.wma.net) and in accordance with the Medical Research Involving Human Subjects  
258 Act (WMO) and other guidelines, regulations, and acts. We received approval from the Medical Ethics  
259 Committee (METC) of the Erasmus MC, and local approval has been obtained from each participating  
260 centre. If deviation from the protocol is necessary, then it will not be implemented without the prior review  
261 and approval of the METC. Signed informed consent will be obtained from all participants. Previous  
262 research demonstrated that (ICU-)VR is safe.<sup>17 22 23 36</sup> Informed-consent forms will be kept in a locked  
263 cabinet in a limited-access room at the Erasmus MC. Data will be archived for 15 years. The handling  
264 of personal data complies with the Dutch law. On completion of the study, its findings will be published  
265 in peer-reviewed journals and presented at national and international scientific conferences to publicize  
266 the research to healthcare professionals, health services authorities and the public. A summary of the  
267 results will be made available to the study patients if requested.

### 268 **Patient and public involvement statement**

269 Patients and/or the public were not involved in the design, or conduct, or reporting, or dissemination  
270 plans of this research.

271 **Tables****Table 1.** Questionnaire per follow-up moment.

|                                                                 | <b>T0.</b>             | <b>T1.</b>       | <b>T2/T3/T4</b>             |
|-----------------------------------------------------------------|------------------------|------------------|-----------------------------|
| <b>Questionnaire:</b>                                           | At ICU admission       | At ICU discharge | Follow-up<br>(1/3/6 months) |
| Baseline demographics                                           | X                      | X                | X                           |
| HADS<br>(Anxiety and Depression)                                | X<br>(retrospectively) |                  | X                           |
| IES-R<br>(Post-Traumatic Stress Disorder)                       |                        | X                | X                           |
| RAND-36<br>Quality of Life                                      | X<br>(retrospectively) |                  | X                           |
| Subset CQI-Relatives in the ICU<br>Understanding ICU procedures |                        | X                |                             |
| CSI<br>Caregiving Concerns                                      |                        |                  | X                           |
| Perceived Stress Factors                                        |                        | X                |                             |
| Perspectives on the ICU-VR-F<br>intervention                    |                        | X                | X                           |

Abbreviations: CSI, caregivers strain index; CQI, consumer quality index; HADS, hospital anxiety and depression scale; ICU, intensive care unit; ICU-VR-F, intensive care unit-specific virtual reality for relatives; RAND-36; research and development 36-item questionnaire.

272

1  
2  
3  
4 273 **Figures**

5  
6  
7 274 **Figure 1. Flow-diagram of the study.**

8  
9 275 Abbreviations: CSI, caregivers strain index; HADS, hospital anxiety and depression scale; ICU,  
10  
11  
12 276 intensive care unit; ICU-LOS, Intensive Care Unit length-of-stay; ICU-VR-F, Intensive Care Unit-  
13  
14  
15 277 specific Virtual Reality for Family members/relatives; IES-R, impact of event scale-revised; RAND-36,  
16  
17  
18 278 research and development 36-item questionnaire.

19  
20  
21  
22 279 **Figure 2. Overview of procedures for relatives in the intervention group who are allowed to visit the**  
23  
24  
25 280 **hospital.**

26  
27  
28  
29 281 **Figure 3. Overview of procedures for relatives in the intervention group who are not allowed to visit the**  
30  
31  
32 282 **hospital.**

## 283 References

- 284 1. Davidson JE, Jones C, Bienvenu OJ. Family response to critical illness: Postintensive care syndrome–  
285 family. *Crit Care Med* 2012;**40**(2):618-24.
- 286 2. Needham DM, Davidson J, Cohen H, et al. Improving long-term outcomes after discharge from  
287 intensive care unit: report from a stakeholders' conference. *Crit Care Med* 2012;**40**(2):502-9.
- 288 3. Harvey MA, Davidson JE. Postintensive Care Syndrome: Right Care, Right Now...and Later. *Crit Care*  
289 *Med* 2016;**44**(2):381-5.
- 290 4. van Beusekom I, Bakhshi-Raiez F, de Keizer NF, et al. Reported burden on informal caregivers of  
291 ICU survivors: a literature review. *Crit Care* 2016;**20**:16.
- 292 5. Anderson WG, Arnold RM, Angus DC, et al. Posttraumatic stress and complicated grief in family  
293 members of patients in the intensive care unit. *J Gen Intern Med* 2008;**23**(11):1871-76.
- 294 6. Vermeir J, Holley A, Lipman J. "Not out of the woods"--a wife's perspective: bedside communication.  
295 *Intensive Care Med* 2016;**42**(3):446-47.
- 296 7. Balluffi A, Kassam-Adams N, Kazak A, et al. Traumatic stress in parents of children admitted to the  
297 pediatric intensive care unit. *Pediatr Crit Care Med* 2004;**5**(6):547-53.
- 298 8. Azoulay E, Pochard F, Kentish-Barnes N, et al. Risk of post-traumatic stress symptoms in family  
299 members of intensive care unit patients. *Am J Respir Crit Care Med* 2005;**171**(9):987-94.
- 300 9. Miles MS, Holditch-Davis D, Schwartz TA, et al. Depressive symptoms in mothers of prematurely  
301 born infants. *J Dev Behav Pediatr* 2007;**28**(1):36-44.
- 302 10. Siegel MD, Hayes E, Vanderwerker LC, et al. Psychiatric illness in the next of kin of patients who  
303 die in the intensive care unit. *Crit Care Med* 2008;**36**(6):1722-28.

- 1  
2  
3 304 11. Lefkowitz DS, Baxt C, Evans JR. Prevalence and correlates of posttraumatic stress and postpartum  
4  
5 305 depression in parents of infants in the Neonatal Intensive Care Unit (NICU). *J Clin Psychol Med*  
6  
7 306 *Settings* 2010;**17**(3):230-37.
- 9  
10  
11 307 12. Black MD, Vigorito MC, Curtis JR, et al. A multifaceted intervention to improve compliance with  
12  
13 308 process measures for ICU clinician communication with ICU patients and families. *Crit Care*  
14  
15 309 *Med* 2013;**41**(10):2275-83.
- 17  
18 310 13. Lautrette A, Darmon M, Megarbane B, et al. A communication strategy and brochure for relatives of  
19  
20 311 patients dying in the ICU. *N Engl J Med* 2007;**356**(5):469-78.
- 22  
23  
24 312 14. Shirley ED, Sanders JO. Patient satisfaction: Implications and predictors of success. *J Bone Joint*  
25  
26 313 *Surg Am* 2013;**95**(10):e69.
- 28  
29 314 15. Shafipour V, Moosazadeh M, Jannati Y, et al. The effect of education on the anxiety of a family with  
30  
31 315 a patient in critical care unit: a systematic review and meta-analysis. *Electronic physician*  
32  
33 316 2017;**9**(3):3918.
- 35  
36 317 16. Zante B, Camenisch SA, Schefold JC. Interventions in Post-Intensive Care Syndrome-Family: A  
37  
38 318 Systematic Literature Review. *Crit Care Med* 2020.
- 40  
41  
42 319 17. Bekelis K, Calnan D, Simmons N, et al. Effect of an Immersive Preoperative Virtual Reality  
43  
44 320 Experience on Patient Reported Outcomes: A Randomized Controlled Trial. *Ann Surg*  
45  
46 321 2017;**265**(6):1068-73.
- 48  
49 322 18. Maples-Keller JL, Bunnell BE, Kim SJ, et al. The Use of Virtual Reality Technology in the Treatment  
50  
51 323 of Anxiety and Other Psychiatric Disorders. *Harv Rev Psychiatry* 2017;**25**(3):103-13.
- 53  
54  
55 324 19. Mishkind MC, Norr AM, Katz AC, et al. Review of Virtual Reality Treatment in Psychiatry: Evidence  
56  
57 325 Versus Current Diffusion and Use. *Curr Psychiatry Rep* 2017;**19**(11):80.
- 58  
59  
60

- 1  
2  
3 326 20. Kothgassner OD, Goreis A, Kafka JX, et al. Virtual reality exposure therapy for posttraumatic stress  
4  
5 327 disorder (PTSD): a meta-analysis. *Eur J Psychotraumatol* 2019;**10**(1):1654782.  
6  
7  
8 328 21. Wechsler TF, Kumpers F, Muhlberger A. Inferiority or Even Superiority of Virtual Reality Exposure  
9  
10 329 Therapy in Phobias?-A Systematic Review and Quantitative Meta-Analysis on Randomized  
11  
12 330 Controlled Trials Specifically Comparing the Efficacy of Virtual Reality Exposure to Gold  
13  
14 331 Standard in vivo Exposure in Agoraphobia, Specific Phobia, and Social Phobia. *Front Psychol*  
15  
16 332 2019;**10**:1758.  
17  
18  
19  
20 333 22. Vlasek JH, Wils EJ, Van Bommel J, et al. Intensive Care Specific Virtual Reality Exposure Therapy  
21  
22 334 is immersive, feasible and safe to treat psychological post-ICU sequelae; a healthy adult study.  
23  
24 335 *ICMx* 2019;**7**(suppl.3):162-63.  
25  
26  
27  
28 336 23. Vlasek JH, Wils E-J, Van Bommel J, et al. Intensive Care specific Virtual Reality (ICU-VR) to improve  
29  
30 337 Post-Intensive Care Syndrome-related psychological sequelae in survivors of critical illness.  
31  
32 338 *ICMx* 2020;**8**(suppl.2).  
33  
34  
35  
36 339 24. Zigmond AS, Snaith RP. The hospital anxiety and depression scale. *Acta Psychiatr Scand*  
37  
38 340 1983;**67**(6):361-70.  
39  
40  
41 341 25. Weiss DS. The impact of event scale: revised. Cross-cultural assessment of psychological trauma  
42  
43 342 and PTSD: Springer, 2007:219-38.  
44  
45  
46 343 26. Hays RD, Sherbourne CD, Mazel RM. The rand 36-item health survey 1.0. *Health Econ*  
47  
48 344 1993;**2**(3):217-27.  
49  
50  
51 345 27. Rensen A, van Mol MM, Menheere I, et al. Quality of care in the intensive care unit from the  
52  
53 346 perspective of patient's relatives: development and psychometric evaluation of the consumer  
54  
55 347 quality index 'R-ICU'. *BMC Health Serv Res* 2017;**17**(1):77.  
56  
57  
58  
59  
60



- 1  
2  
3 348 28. Bruck E, Schandl A, Bottai M, et al. The impact of sepsis, delirium, and psychological distress on  
4  
5 349 self-rated cognitive function in ICU survivors—a prospective cohort study. *J Intensive Care*  
6  
7 350 2018;**6**:2.  
8  
9  
10  
11 351 29. Creamer M, Bell R, Failla S. Psychometric properties of the impact of event scale—revised. *Behav*  
12  
13 352 *Res Ther* 2003;**41**(12):1489-96.  
14  
15  
16 353 30. de Miranda S, Pochard F, Chaize M, et al. Postintensive care unit psychological burden in patients  
17  
18 354 with chronic obstructive pulmonary disease and informal caregivers: a multicenter study. *Crit*  
19  
20 355 *Care Med* 2011;**39**(1):112-18.  
21  
22  
23  
24 356 31. Bjelland I, Dahl AA, Haug TT, et al. The validity of the Hospital Anxiety and Depression Scale: an  
25  
26 357 updated literature review. *J Psychosom Res* 2002;**52**(2):69-77.  
27  
28  
29 358 32. Sukantarat KT, Williamson RC, Brett SJ. Psychological assessment of ICU survivors: a comparison  
30  
31 359 between the Hospital Anxiety and Depression scale and the Depression, Anxiety and Stress  
32  
33 360 scale. *Anaesthesia* 2007;**62**(3):239-43.  
34  
35  
36 361 33. Lacerda M, Ardington C, Leibbrandt M. Sequential regression multiple imputation for incomplete  
37  
38 362 multivariate data using Markov chain Monte Carlo. 2007.  
39  
40  
41  
42 363 34. Lydersen S. Last observation carried forward. *Tidsskr Nor Laegeforen* 2019;**139**(9).  
43  
44  
45 364 35. Benjamini Y, Hochberg Y. Controlling the false discovery rate: a practical and powerful approach to  
46  
47 365 multiple testing. *Journal of the Royal statistical society: series B (Methodological)*  
48  
49 366 1995;**57**(1):289-300.  
50  
51  
52  
53 367 36. Turon M, Fernandez-Gonzalo S, Jodar M, et al. Feasibility and safety of virtual-reality-based early  
54  
55 368 neurocognitive stimulation in critically ill patients. *Ann Intensive Care* 2017;**7**(1):81.  
56  
57  
58  
59  
60

1  
2  
3 369 **Authors' contributions**  
4

5  
6 370 J.V., J.v.B., E.W., D.G., and M.v.G. conceived the study and initiated the study design. M.v.G. is the  
7  
8  
9 371 coordinating investigator and grant holder. D.G. is the principal investigator. T.K. provided statistical  
10  
11  
12 372 expertise in the clinical trial design, and J.V. and T.K. wrote the statistical analysis plan. J.v.B., E.W.,  
13  
14  
15 373 J.L., and A.S. are the local principal investigators at each study site. All the authors contributed to the  
16  
17  
18 374 refinement of the study protocol and approved the final manuscript. J.V. and M.v.B. wrote the first  
19  
20  
21 375 manuscript draft. J.V. and M.H. composed the questionnaires used in the study. J.V. and M.v.B. will  
22  
23  
24 376 collect the data and conduct the study.  
25

26  
27 377 **Funding statement**  
28

29  
30 378 This study was supported by DSW, Stichting Theia, Stichting SGS, and BeterKeten. The funding  
31  
32  
33 379 sources have no role in the design of the study and collection, analysis, and interpretation of data nor in  
34  
35  
36 380 writing the manuscript.  
37

38  
39 381 **Competing interests statement**  
40

41  
42 382 The authors declare that they have no conflicting or competing interests to disclose.  
43  
44

45  
46 383 **Patient and public involvement statement**  
47

48  
49 384 Patients and/or the public were not involved in the design, or conduct, or reporting, or dissemination  
50  
51  
52 385 plans of this research.  
53

54  
55 386 **Data Sharing statement**  
56

57  
58 387 Not applicable.  
59  
60

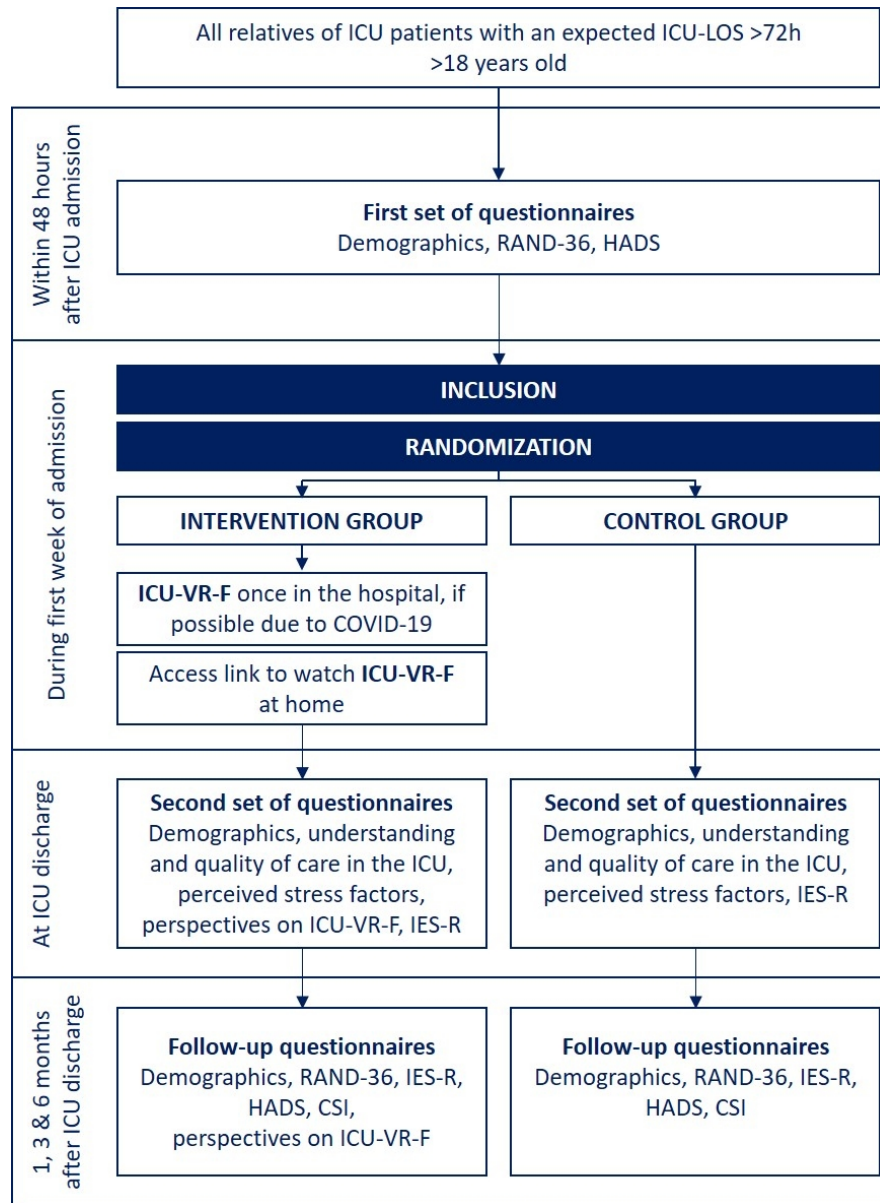

45 Figure 1. Flow-diagram of the study.

46 Abbreviations: CSI, caregivers strain index; HADS, hospital anxiety and depression scale; ICU, intensive  
 47 care unit; ICU-LOS, Intensive Care Unit length-of-stay; ICU-VR-F, Intensive Care Unit-specific Virtual Reality  
 48 for Family members/relatives; IES-R, impact of event scale-revised; RAND-36, research and development  
 49 36-item questionnaire.

50 147x200mm (150 x 150 DPI)

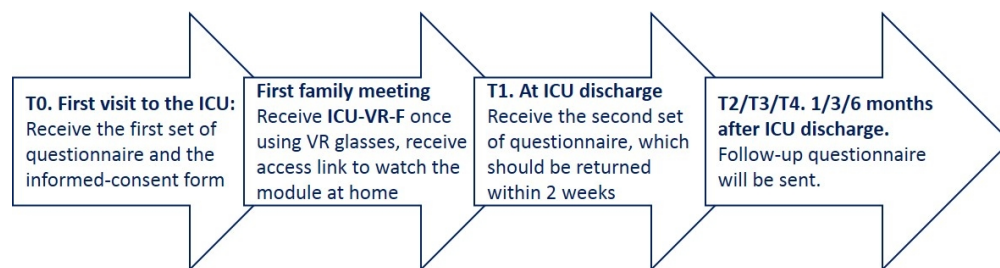

Figure 2. Overview of procedures for relatives in the intervention group who are allowed to visit the hospital.

199x52mm (150 x 150 DPI)

1  
2  
3  
4  
5  
6  
7  
8  
9  
10  
11  
12  
13  
14  
15  
16  
17  
18  
19  
20  
21  
22  
23  
24  
25  
26  
27  
28  
29  
30  
31  
32  
33  
34  
35  
36  
37  
38  
39  
40  
41  
42  
43  
44  
45  
46  
47  
48  
49  
50  
51  
52  
53  
54  
55  
56  
57  
58  
59  
60

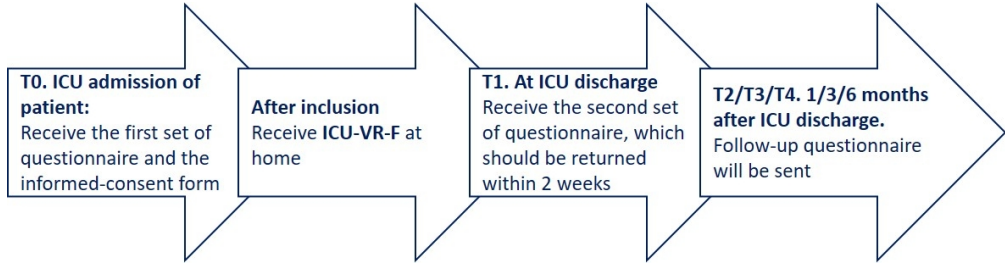

Figure 3. Overview of procedures for relatives in the intervention group who are not allowed to visit the hospital.

199x52mm (150 x 150 DPI)

# Reporting checklist for protocol of a clinical trial.

Based on the SPIRIT guidelines.

## Instructions to authors

Complete this checklist by entering the page numbers from your manuscript where readers will find each of the items listed below.

Your article may not currently address all the items on the checklist. Please modify your text to include the missing information. If you are certain that an item does not apply, please write "n/a" and provide a short explanation.

Upload your completed checklist as an extra file when you submit to a journal.

In your methods section, say that you used the SPIRIT reporting guidelines, and cite them as:

Chan A-W, Tetzlaff JM, Gøtzsche PC, Altman DG, Mann H, Berlin J, Dickersin K, Hróbjartsson A, Schulz KF, Parulekar WR, Krleža-Jerić K, Laupacis A, Moher D. SPIRIT 2013 Explanation and Elaboration: Guidance for protocols of clinical trials. *BMJ*. 2013;346:e7586

|                                             |                     | Reporting Item                                                                                               | Page Number |
|---------------------------------------------|---------------------|--------------------------------------------------------------------------------------------------------------|-------------|
| <b>Administrative information</b>           |                     |                                                                                                              |             |
| Title                                       | <a href="#">#1</a>  | Descriptive title identifying the study design, population, interventions, and, if applicable, trial acronym | 1           |
| Trial registration                          | <a href="#">#2a</a> | Trial identifier and registry name. If not yet registered, name of intended registry                         | 2           |
| Trial registration: data set                | <a href="#">#2b</a> | All items from the World Health Organization Trial Registration Data Set                                     | N/A         |
| Protocol version                            | <a href="#">#3</a>  | Date and version identifier                                                                                  | 2           |
| Funding                                     | <a href="#">#4</a>  | Sources and types of financial, material, and other support                                                  | 17          |
| Roles and responsibilities: contributorship | <a href="#">#5a</a> | Names, affiliations, and roles of protocol contributors                                                      | 17          |

|    |                           |                     |                                                                      |     |
|----|---------------------------|---------------------|----------------------------------------------------------------------|-----|
| 1  | Roles and                 | <a href="#">#5b</a> | Name and contact information for the trial sponsor                   | 1   |
| 2  | responsibilities:         |                     |                                                                      |     |
| 3  | sponsor contact           |                     |                                                                      |     |
| 4  | information               |                     |                                                                      |     |
| 5  |                           |                     |                                                                      |     |
| 6  |                           |                     |                                                                      |     |
| 7  |                           |                     |                                                                      |     |
| 8  | Roles and                 | <a href="#">#5c</a> | Role of study sponsor and funders, if any, in study design;          | 17  |
| 9  | responsibilities:         |                     | collection, management, analysis, and interpretation of data;        |     |
| 10 | sponsor and funder        |                     | writing of the report; and the decision to submit the report for     |     |
| 11 |                           |                     | publication, including whether they will have ultimate authority     |     |
| 12 |                           |                     | over any of these activities                                         |     |
| 13 |                           |                     |                                                                      |     |
| 14 |                           |                     |                                                                      |     |
| 15 |                           |                     |                                                                      |     |
| 16 | Roles and                 | <a href="#">#5d</a> | Composition, roles, and responsibilities of the coordinating centre, | 11  |
| 17 | responsibilities:         |                     | steering committee, endpoint adjudication committee, data            |     |
| 18 | committees                |                     | management team, and other individuals or groups overseeing the      |     |
| 19 |                           |                     | trial, if applicable (see Item 21a for data monitoring committee)    |     |
| 20 |                           |                     |                                                                      |     |
| 21 |                           |                     |                                                                      |     |
| 22 |                           |                     |                                                                      |     |
| 23 | <b>Introduction</b>       |                     |                                                                      |     |
| 24 |                           |                     |                                                                      |     |
| 25 | Background and            | <a href="#">#6a</a> | Description of research question and justification for undertaking   | 1-2 |
| 26 | rationale                 |                     | the trial, including summary of relevant studies (published and      |     |
| 27 |                           |                     | unpublished) examining benefits and harms for each intervention      |     |
| 28 |                           |                     |                                                                      |     |
| 29 |                           |                     |                                                                      |     |
| 30 | Background and            | <a href="#">#6b</a> | Explanation for choice of comparators                                | N/A |
| 31 | rationale: choice of      |                     |                                                                      |     |
| 32 | comparators               |                     |                                                                      |     |
| 33 |                           |                     |                                                                      |     |
| 34 |                           |                     |                                                                      |     |
| 35 |                           |                     |                                                                      |     |
| 36 | Objectives                | <a href="#">#7</a>  | Specific objectives or hypotheses                                    | 2   |
| 37 |                           |                     |                                                                      |     |
| 38 | Trial design              | <a href="#">#8</a>  | Description of trial design including type of trial (eg, parallel    | 6   |
| 39 |                           |                     | group, crossover, factorial, single group), allocation ratio, and    |     |
| 40 |                           |                     | framework (eg, superiority, equivalence, non-inferiority,            |     |
| 41 |                           |                     | exploratory)                                                         |     |
| 42 |                           |                     |                                                                      |     |
| 43 |                           |                     |                                                                      |     |
| 44 |                           |                     |                                                                      |     |
| 45 | <b>Methods:</b>           |                     |                                                                      |     |
| 46 | <b>Participants,</b>      |                     |                                                                      |     |
| 47 | <b>interventions, and</b> |                     |                                                                      |     |
| 48 | <b>outcomes</b>           |                     |                                                                      |     |
| 49 |                           |                     |                                                                      |     |
| 50 |                           |                     |                                                                      |     |
| 51 | Study setting             | <a href="#">#9</a>  | Description of study settings (eg, community clinic, academic        | 6   |
| 52 |                           |                     | hospital) and list of countries where data will be collected.        |     |
| 53 |                           |                     | Reference to where list of study sites can be obtained               |     |
| 54 |                           |                     |                                                                      |     |
| 55 |                           |                     |                                                                      |     |
| 56 |                           |                     |                                                                      |     |
| 57 | Eligibility criteria      | <a href="#">#10</a> | Inclusion and exclusion criteria for participants. If applicable,    | 6   |
| 58 |                           |                     | eligibility criteria for study centres and individuals who will      |     |
| 59 |                           |                     |                                                                      |     |
| 60 |                           |                     |                                                                      |     |

|    |                              |                                                                                            |     |
|----|------------------------------|--------------------------------------------------------------------------------------------|-----|
|    |                              | perform the interventions (eg, surgeons, psychotherapists)                                 |     |
| 1  |                              |                                                                                            |     |
| 2  | Interventions:               | <a href="#">#11a</a> Interventions for each group with sufficient detail to allow          | 6   |
| 3  | description                  | replication, including how and when they will be administered                              |     |
| 4  |                              |                                                                                            |     |
| 5  | Interventions:               | <a href="#">#11b</a> Criteria for discontinuing or modifying allocated interventions for a | N/A |
| 6  | modifications                | given trial participant (eg, drug dose change in response to harms,                        |     |
| 7  |                              | participant request, or improving / worsening disease)                                     |     |
| 8  |                              |                                                                                            |     |
| 9  | Interventions:               | <a href="#">#11c</a> Strategies to improve adherence to intervention protocols, and any    | N/A |
| 10 | adherence                    | procedures for monitoring adherence (eg, drug tablet return;                               |     |
| 11 |                              | laboratory tests)                                                                          |     |
| 12 | Interventions:               | <a href="#">#11d</a> Relevant concomitant care and interventions that are permitted or     | N/A |
| 13 | concomitant care             | prohibited during the trial                                                                |     |
| 14 |                              |                                                                                            |     |
| 15 | Outcomes                     | <a href="#">#12</a> Primary, secondary, and other outcomes, including the specific         | 8-9 |
| 16 |                              | measurement variable (eg, systolic blood pressure), analysis metric                        |     |
| 17 |                              | (eg, change from baseline, final value, time to event), method of                          |     |
| 18 |                              | aggregation (eg, median, proportion), and time point for each                              |     |
| 19 |                              | outcome. Explanation of the clinical relevance of chosen efficacy                          |     |
| 20 |                              | and harm outcomes is strongly recommended                                                  |     |
| 21 | Participant timeline         | <a href="#">#13</a> Time schedule of enrolment, interventions (including any run-ins       | 7   |
| 22 |                              | and washouts), assessments, and visits for participants. A                                 |     |
| 23 |                              | schematic diagram is highly recommended (see Figure)                                       |     |
| 24 |                              |                                                                                            |     |
| 25 | Sample size                  | <a href="#">#14</a> Estimated number of participants needed to achieve study               | 9   |
| 26 |                              | objectives and how it was determined, including clinical and                               |     |
| 27 |                              | statistical assumptions supporting any sample size calculations                            |     |
| 28 |                              |                                                                                            |     |
| 29 | Recruitment                  | <a href="#">#15</a> Strategies for achieving adequate participant enrolment to reach       | 7   |
| 30 |                              | target sample size                                                                         |     |
| 31 |                              |                                                                                            |     |
| 32 |                              |                                                                                            |     |
| 33 |                              |                                                                                            |     |
| 34 |                              |                                                                                            |     |
| 35 |                              |                                                                                            |     |
| 36 |                              |                                                                                            |     |
| 37 |                              |                                                                                            |     |
| 38 |                              |                                                                                            |     |
| 39 |                              |                                                                                            |     |
| 40 |                              |                                                                                            |     |
| 41 |                              |                                                                                            |     |
| 42 |                              |                                                                                            |     |
| 43 |                              |                                                                                            |     |
| 44 |                              |                                                                                            |     |
| 45 | <b>Methods: Assignment</b>   |                                                                                            |     |
| 46 | <b>of interventions (for</b> |                                                                                            |     |
| 47 | <b>controlled trials)</b>    |                                                                                            |     |
| 48 |                              |                                                                                            |     |
| 49 |                              |                                                                                            |     |
| 50 | Allocation: sequence         | <a href="#">#16a</a> Method of generating the allocation sequence (eg, computer-           | 7   |
| 51 | generation                   | generated random numbers), and list of any factors for                                     |     |
| 52 |                              | stratification. To reduce predictability of a random sequence,                             |     |
| 53 |                              | details of any planned restriction (eg, blocking) should be provided                       |     |
| 54 |                              | in a separate document that is unavailable to those who enrol                              |     |
| 55 |                              | participants or assign interventions                                                       |     |
| 56 |                              |                                                                                            |     |
| 57 |                              |                                                                                            |     |
| 58 |                              |                                                                                            |     |
| 59 |                              |                                                                                            |     |
| 60 |                              |                                                                                            |     |



|    |                        |                      |                                                                       |    |
|----|------------------------|----------------------|-----------------------------------------------------------------------|----|
| 1  | Allocation concealment | <a href="#">#16b</a> | Mechanism of implementing the allocation sequence (eg, central        | 7  |
| 2  | mechanism              |                      | telephone; sequentially numbered, opaque, sealed envelopes),          |    |
| 3  |                        |                      | describing any steps to conceal the sequence until interventions are  |    |
| 4  |                        |                      | assigned                                                              |    |
| 5  |                        |                      |                                                                       |    |
| 6  |                        |                      |                                                                       |    |
| 7  |                        |                      |                                                                       |    |
| 8  | Allocation:            | <a href="#">#16c</a> | Who will generate the allocation sequence, who will enrol             | 7  |
| 9  | implementation         |                      | participants, and who will assign participants to interventions       |    |
| 10 |                        |                      |                                                                       |    |
| 11 | Blinding (masking)     | <a href="#">#17a</a> | Who will be blinded after assignment to interventions (eg, trial      | 7  |
| 12 |                        |                      | participants, care providers, outcome assessors, data analysts), and  |    |
| 13 |                        |                      | how                                                                   |    |
| 14 |                        |                      |                                                                       |    |
| 15 |                        |                      |                                                                       |    |
| 16 |                        |                      |                                                                       |    |
| 17 | Blinding (masking):    | <a href="#">#17b</a> | If blinded, circumstances under which unblinding is permissible,      | 7  |
| 18 | emergency unblinding   |                      | and procedure for revealing a participant's allocated intervention    |    |
| 19 |                        |                      | during the trial                                                      |    |
| 20 |                        |                      |                                                                       |    |
| 21 |                        |                      |                                                                       |    |
| 22 | <b>Methods: Data</b>   |                      |                                                                       |    |
| 23 | <b>collection,</b>     |                      |                                                                       |    |
| 24 | <b>management, and</b> |                      |                                                                       |    |
| 25 | <b>analysis</b>        |                      |                                                                       |    |
| 26 |                        |                      |                                                                       |    |
| 27 |                        |                      |                                                                       |    |
| 28 |                        |                      |                                                                       |    |
| 29 | Data collection plan   | <a href="#">#18a</a> | Plans for assessment and collection of outcome, baseline, and other   | 9  |
| 30 |                        |                      | trial data, including any related processes to promote data quality   |    |
| 31 |                        |                      | (eg, duplicate measurements, training of assessors) and a             |    |
| 32 |                        |                      | description of study instruments (eg, questionnaires, laboratory      |    |
| 33 |                        |                      | tests) along with their reliability and validity, if known. Reference |    |
| 34 |                        |                      | to where data collection forms can be found, if not in the protocol   |    |
| 35 |                        |                      |                                                                       |    |
| 36 |                        |                      |                                                                       |    |
| 37 |                        |                      |                                                                       |    |
| 38 |                        |                      |                                                                       |    |
| 39 | Data collection plan:  | <a href="#">#18b</a> | Plans to promote participant retention and complete follow-up,        | 9  |
| 40 | retention              |                      | including list of any outcome data to be collected for participants   |    |
| 41 |                        |                      | who discontinue or deviate from intervention protocols                |    |
| 42 |                        |                      |                                                                       |    |
| 43 |                        |                      |                                                                       |    |
| 44 | Data management        | <a href="#">#19</a>  | Plans for data entry, coding, security, and storage, including any    | 9  |
| 45 |                        |                      | related processes to promote data quality (eg, double data entry;     |    |
| 46 |                        |                      | range checks for data values). Reference to where details of data     |    |
| 47 |                        |                      | management procedures can be found, if not in the protocol            |    |
| 48 |                        |                      |                                                                       |    |
| 49 |                        |                      |                                                                       |    |
| 50 |                        |                      |                                                                       |    |
| 51 | Statistics: outcomes   | <a href="#">#20a</a> | Statistical methods for analysing primary and secondary outcomes.     | 10 |
| 52 |                        |                      | Reference to where other details of the statistical analysis plan can |    |
| 53 |                        |                      | be found, if not in the protocol                                      |    |
| 54 |                        |                      |                                                                       |    |
| 55 |                        |                      |                                                                       |    |
| 56 | Statistics: additional | <a href="#">#20b</a> | Methods for any additional analyses (eg, subgroup and adjusted        | 10 |
| 57 | analyses               |                      | analyses)                                                             |    |
| 58 |                        |                      |                                                                       |    |
| 59 |                        |                      |                                                                       |    |
| 60 |                        |                      |                                                                       |    |

|    |                            |                      |                                                                         |       |
|----|----------------------------|----------------------|-------------------------------------------------------------------------|-------|
| 1  | Statistics: analysis       | <a href="#">#20c</a> | Definition of analysis population relating to protocol non-             | 10    |
| 2  | population and missing     |                      | adherence (eg, as randomised analysis), and any statistical methods     |       |
| 3  | data                       |                      | to handle missing data (eg, multiple imputation)                        |       |
| 4  |                            |                      |                                                                         |       |
| 5  |                            |                      |                                                                         |       |
| 6  | <b>Methods: Monitoring</b> |                      |                                                                         |       |
| 7  |                            |                      |                                                                         |       |
| 8  |                            |                      |                                                                         |       |
| 9  | Data monitoring:           | <a href="#">#21a</a> | Composition of data monitoring committee (DMC); summary of its          | N/A   |
| 10 | formal committee           |                      | role and reporting structure; statement of whether it is independent    |       |
| 11 |                            |                      | from the sponsor and competing interests; and reference to where        |       |
| 12 |                            |                      | further details about its charter can be found, if not in the protocol. |       |
| 13 |                            |                      | Alternatively, an explanation of why a DMC is not needed                |       |
| 14 |                            |                      |                                                                         |       |
| 15 |                            |                      |                                                                         |       |
| 16 |                            |                      |                                                                         |       |
| 17 | Data monitoring:           | <a href="#">#21b</a> | Description of any interim analyses and stopping guidelines,            | N/A   |
| 18 | interim analysis           |                      | including who will have access to these interim results and make        |       |
| 19 |                            |                      | the final decision to terminate the trial                               |       |
| 20 |                            |                      |                                                                         |       |
| 21 |                            |                      |                                                                         |       |
| 22 | Harms                      | <a href="#">#22</a>  | Plans for collecting, assessing, reporting, and managing solicited      | 11    |
| 23 |                            |                      | and spontaneously reported adverse events and other unintended          |       |
| 24 |                            |                      | effects of trial interventions or trial conduct                         |       |
| 25 |                            |                      |                                                                         |       |
| 26 |                            |                      |                                                                         |       |
| 27 |                            |                      |                                                                         |       |
| 28 | Auditing                   | <a href="#">#23</a>  | Frequency and procedures for auditing trial conduct, if any, and        | N/A   |
| 29 |                            |                      | whether the process will be independent from investigators and the      |       |
| 30 |                            |                      | sponsor                                                                 |       |
| 31 |                            |                      |                                                                         |       |
| 32 |                            |                      |                                                                         |       |
| 33 | <b>Ethics and</b>          |                      |                                                                         |       |
| 34 | <b>dissemination</b>       |                      |                                                                         |       |
| 35 |                            |                      |                                                                         |       |
| 36 |                            |                      |                                                                         |       |
| 37 | Research ethics            | <a href="#">#24</a>  | Plans for seeking research ethics committee / institutional review      | 6, 11 |
| 38 | approval                   |                      | board (REC / IRB) approval                                              |       |
| 39 |                            |                      |                                                                         |       |
| 40 |                            |                      |                                                                         |       |
| 41 | Protocol amendments        | <a href="#">#25</a>  | Plans for communicating important protocol modifications (eg,           | N/A   |
| 42 |                            |                      | changes to eligibility criteria, outcomes, analyses) to relevant        |       |
| 43 |                            |                      | parties (eg, investigators, REC / IRBs, trial participants, trial       |       |
| 44 |                            |                      | registries, journals, regulators)                                       |       |
| 45 |                            |                      |                                                                         |       |
| 46 |                            |                      |                                                                         |       |
| 47 | Consent or assent          | <a href="#">#26a</a> | Who will obtain informed consent or assent from potential trial         | 7     |
| 48 |                            |                      | participants or authorised surrogates, and how (see Item 32)            |       |
| 49 |                            |                      |                                                                         |       |
| 50 |                            |                      |                                                                         |       |
| 51 | Consent or assent:         | <a href="#">#26b</a> | Additional consent provisions for collection and use of participant     | N/A   |
| 52 | ancillary studies          |                      | data and biological specimens in ancillary studies, if applicable       |       |
| 53 |                            |                      |                                                                         |       |
| 54 |                            |                      |                                                                         |       |
| 55 | Confidentiality            | <a href="#">#27</a>  | How personal information about potential and enrolled participants      | 9     |
| 56 |                            |                      | will be collected, shared, and maintained in order to protect           |       |
| 57 |                            |                      | confidentiality before, during, and after the trial                     |       |
| 58 |                            |                      |                                                                         |       |
| 59 |                            |                      |                                                                         |       |
| 60 |                            |                      |                                                                         |       |

|    |                                             |                      |                                                                                                                                                                                                                                                                                     |     |
|----|---------------------------------------------|----------------------|-------------------------------------------------------------------------------------------------------------------------------------------------------------------------------------------------------------------------------------------------------------------------------------|-----|
| 1  | Declaration of interests                    | <a href="#">#28</a>  | Financial and other competing interests for principal investigators for the overall trial and each study site                                                                                                                                                                       | 17  |
| 2  |                                             |                      |                                                                                                                                                                                                                                                                                     |     |
| 3  |                                             |                      |                                                                                                                                                                                                                                                                                     |     |
| 4  | Data access                                 | <a href="#">#29</a>  | Statement of who will have access to the final trial dataset, and disclosure of contractual agreements that limit such access for investigators                                                                                                                                     | 9   |
| 5  |                                             |                      |                                                                                                                                                                                                                                                                                     |     |
| 6  |                                             |                      |                                                                                                                                                                                                                                                                                     |     |
| 7  |                                             |                      |                                                                                                                                                                                                                                                                                     |     |
| 8  |                                             |                      |                                                                                                                                                                                                                                                                                     |     |
| 9  |                                             |                      |                                                                                                                                                                                                                                                                                     |     |
| 10 | Ancillary and post trial care               | <a href="#">#30</a>  | Provisions, if any, for ancillary and post-trial care, and for compensation to those who suffer harm from trial participation                                                                                                                                                       | N/A |
| 11 |                                             |                      |                                                                                                                                                                                                                                                                                     |     |
| 12 |                                             |                      |                                                                                                                                                                                                                                                                                     |     |
| 13 |                                             |                      |                                                                                                                                                                                                                                                                                     |     |
| 14 | Dissemination policy: trial results         | <a href="#">#31a</a> | Plans for investigators and sponsor to communicate trial results to participants, healthcare professionals, the public, and other relevant groups (eg, via publication, reporting in results databases, or other data sharing arrangements), including any publication restrictions | 11  |
| 15 |                                             |                      |                                                                                                                                                                                                                                                                                     |     |
| 16 |                                             |                      |                                                                                                                                                                                                                                                                                     |     |
| 17 |                                             |                      |                                                                                                                                                                                                                                                                                     |     |
| 18 |                                             |                      |                                                                                                                                                                                                                                                                                     |     |
| 19 |                                             |                      |                                                                                                                                                                                                                                                                                     |     |
| 20 |                                             |                      |                                                                                                                                                                                                                                                                                     |     |
| 21 | Dissemination policy: authorship            | <a href="#">#31b</a> | Authorship eligibility guidelines and any intended use of professional writers                                                                                                                                                                                                      | N/A |
| 22 |                                             |                      |                                                                                                                                                                                                                                                                                     |     |
| 23 |                                             |                      |                                                                                                                                                                                                                                                                                     |     |
| 24 | Dissemination policy: reproducible research | <a href="#">#31c</a> | Plans, if any, for granting public access to the full protocol, participant-level dataset, and statistical code                                                                                                                                                                     | N/A |
| 25 |                                             |                      |                                                                                                                                                                                                                                                                                     |     |
| 26 |                                             |                      |                                                                                                                                                                                                                                                                                     |     |
| 27 |                                             |                      |                                                                                                                                                                                                                                                                                     |     |
| 28 | <b>Appendices</b>                           |                      |                                                                                                                                                                                                                                                                                     |     |
| 29 |                                             |                      |                                                                                                                                                                                                                                                                                     |     |
| 30 |                                             |                      |                                                                                                                                                                                                                                                                                     |     |
| 31 | Informed consent materials                  | <a href="#">#32</a>  | Model consent form and other related documentation given to participants and authorised surrogates                                                                                                                                                                                  | N/A |
| 32 |                                             |                      |                                                                                                                                                                                                                                                                                     |     |
| 33 |                                             |                      |                                                                                                                                                                                                                                                                                     |     |
| 34 | Biological specimens                        | <a href="#">#33</a>  | Plans for collection, laboratory evaluation, and storage of biological specimens for genetic or molecular analysis in the current trial and for future use in ancillary studies, if applicable                                                                                      | N/A |
| 35 |                                             |                      |                                                                                                                                                                                                                                                                                     |     |
| 36 |                                             |                      |                                                                                                                                                                                                                                                                                     |     |
| 37 |                                             |                      |                                                                                                                                                                                                                                                                                     |     |
| 38 |                                             |                      |                                                                                                                                                                                                                                                                                     |     |
| 39 |                                             |                      |                                                                                                                                                                                                                                                                                     |     |

40 The SPIRIT checklist is distributed under the terms of the Creative Commons Attribution License CC-BY-ND  
 41 3.0. This checklist was completed on 29. January 2021 using <https://www.goodreports.org/>, a tool made by the  
 42 [EQUATOR Network](#) in collaboration with [Penelope.ai](#)  
 43  
 44  
 45  
 46  
 47  
 48  
 49  
 50  
 51  
 52  
 53  
 54  
 55  
 56  
 57  
 58  
 59  
 60

# BMJ Open

## Virtual reality for relatives of ICU patients to improve psychological sequelae: study protocol for a multicentre, randomized controlled trial.

|                                 |                                                                                                                                                                                                                                                                                                                                                                                                                                                                                                                                                                                                                                                                                                                                                                             |
|---------------------------------|-----------------------------------------------------------------------------------------------------------------------------------------------------------------------------------------------------------------------------------------------------------------------------------------------------------------------------------------------------------------------------------------------------------------------------------------------------------------------------------------------------------------------------------------------------------------------------------------------------------------------------------------------------------------------------------------------------------------------------------------------------------------------------|
| Journal:                        | <i>BMJ Open</i>                                                                                                                                                                                                                                                                                                                                                                                                                                                                                                                                                                                                                                                                                                                                                             |
| Manuscript ID                   | bmjopen-2021-049704.R1                                                                                                                                                                                                                                                                                                                                                                                                                                                                                                                                                                                                                                                                                                                                                      |
| Article Type:                   | Protocol                                                                                                                                                                                                                                                                                                                                                                                                                                                                                                                                                                                                                                                                                                                                                                    |
| Date Submitted by the Author:   | 26-Jul-2021                                                                                                                                                                                                                                                                                                                                                                                                                                                                                                                                                                                                                                                                                                                                                                 |
| Complete List of Authors:       | Vlake, Johan; Erasmus Medical Center, Intensive Care; Franciscus Gasthuis en Vlietland, Intensive Care<br>van Bommel, Jasper; Erasmus MC, Department of Intensive Care<br>Wils, Evert-Jan; Franciscus Gasthuis en Vlietland, Intensive Care<br>Korevaar, Tim; Erasmus Universiteit Rotterdam<br>Hellemons, Merel; Erasmus Medical Center, Pulmonology<br>Klijn, Eva; Erasmus MC, Department of Intensive Care<br>Schut, Anna; Ikazia Hospital, Intensive Care<br>Labout, Joost; Maastad Hospital, Intensive Care<br>Van Bavel, Marten; Erasmus MC, Department of Intensive Care<br>Van Mol, Margo; Erasmus Universiteit Rotterdam, Intensive Care Adults<br>Gommers, Diederik; Erasmus MC, Intensive Care<br>Van Genderen, Michel; Erasmus MC, Department of Intensive Care |
| <b>Primary Subject Heading</b>: | Intensive care                                                                                                                                                                                                                                                                                                                                                                                                                                                                                                                                                                                                                                                                                                                                                              |
| Secondary Subject Heading:      | Mental health, Patient-centred medicine                                                                                                                                                                                                                                                                                                                                                                                                                                                                                                                                                                                                                                                                                                                                     |
| Keywords:                       | INTENSIVE & CRITICAL CARE, Adult intensive & critical care < INTENSIVE & CRITICAL CARE, MENTAL HEALTH, Clinical trials < THERAPEUTICS                                                                                                                                                                                                                                                                                                                                                                                                                                                                                                                                                                                                                                       |
|                                 |                                                                                                                                                                                                                                                                                                                                                                                                                                                                                                                                                                                                                                                                                                                                                                             |

SCHOLARONE™  
Manuscripts



I, the Submitting Author has the right to grant and does grant on behalf of all authors of the Work (as defined in the below author licence), an exclusive licence and/or a non-exclusive licence for contributions from authors who are: i) UK Crown employees; ii) where BMJ has agreed a CC-BY licence shall apply, and/or iii) in accordance with the terms applicable for US Federal Government officers or employees acting as part of their official duties; on a worldwide, perpetual, irrevocable, royalty-free basis to BMJ Publishing Group Ltd ("BMJ") its licensees and where the relevant Journal is co-owned by BMJ to the co-owners of the Journal, to publish the Work in this journal and any other BMJ products and to exploit all rights, as set out in our [licence](#).

The Submitting Author accepts and understands that any supply made under these terms is made by BMJ to the Submitting Author unless you are acting as an employee on behalf of your employer or a postgraduate student of an affiliated institution which is paying any applicable article publishing charge ("APC") for Open Access articles. Where the Submitting Author wishes to make the Work available on an Open Access basis (and intends to pay the relevant APC), the terms of reuse of such Open Access shall be governed by a Creative Commons licence – details of these licences and which [Creative Commons](#) licence will apply to this Work are set out in our licence referred to above.

Other than as permitted in any relevant BMJ Author's Self Archiving Policies, I confirm this Work has not been accepted for publication elsewhere, is not being considered for publication elsewhere and does not duplicate material already published. I confirm all authors consent to publication of this Work and authorise the granting of this licence.

1  
2  
3  
4 1 **Virtual reality for relatives of ICU patients to improve psychological**  
5  
6  
7  
8 2 **sequelae: study protocol for a multicentre, randomized controlled trial.**  
9

10  
11 3 Johan H. Vlaker, BSc<sup>1,2</sup>; Jasper Van Bommel, MD, PhD<sup>1</sup>; Evert-Jan Wils, MD, PhD<sup>2</sup>; Tim I.M. Korevaar,  
12  
13  
14 4 MD, PhD<sup>3,4</sup>; Merel E. Hellemons, MD, PhD<sup>5</sup>; Eva Klijn, MD, PhD<sup>1</sup>; Anna F.C. Schut, MD, PhD<sup>6</sup>; Joost  
15  
16  
17 5 A.M. Labout, MD, PhD<sup>7</sup>; Marten P. van Bavel, BSc<sup>1</sup>; Margo M.C. van Mol, PhD<sup>1</sup>; Diederik Gommers,  
18  
19  
20 6 MD, PhD<sup>1</sup>; Michel E. van Genderen, MD, PhD<sup>1</sup>.

21  
22  
23  
24  
25 7 <sup>1</sup> Department of Intensive Care, Erasmus Medical Centre, Rotterdam, the Netherlands

26  
27 8 <sup>2</sup> Department of Intensive Care, Franciscus Gasthuis & Vlietland, Rotterdam, the Netherlands

28  
29  
30 9 <sup>3</sup> Department of Internal Medicine, Erasmus Medical Centre, Rotterdam, the Netherlands

31  
32  
33 10 <sup>4</sup> Academic Centre for Thyroid Diseases, Erasmus Medical Centre, Rotterdam, the Netherlands

34  
35  
36 11 <sup>5</sup> Department of Pulmonology Medicine, Erasmus Medical Centre, Rotterdam, the Netherlands

37  
38  
39 12 <sup>6</sup> Department of Intensive Care, Ikazia Hospital, Rotterdam, the Netherlands

40  
41  
42 13 <sup>7</sup> Department of Intensive Care, Maasstad Hospital, Rotterdam, the Netherlands

43  
44  
45  
46 14 **Corresponding author:**

47  
48  
49 15 Michel van Genderen

50  
51  
52 16 [M.vanGenderen@erasmusmc.nl](mailto:M.vanGenderen@erasmusmc.nl)

53  
54  
55 17 Tel.: +31 10 704 0 704

56  
57  
58 18 ORCID: 0000-0001-5668-3435

1  
2  
3  
4  
5  
6  
7  
8  
9  
10  
11  
12  
13  
14  
15  
16  
17  
18  
19  
20  
21  
22  
23  
24  
25  
26  
27  
28  
29  
30  
31  
32  
33  
34  
35  
36  
37  
38  
39  
40  
41  
42  
43  
44  
45  
46  
47  
48  
49  
50  
51  
52  
53  
54  
55  
56  
57  
58  
59  
60

19 Department of Intensive Care

20 Erasmus Medical Centre

21 Doctor Molewaterplein 40

22 3015 GD Rotterdam, the Netherlands

23 **Word count:** 3618 words

For peer review only

1  
2  
3 24 **ABSTRACT**  
4  
5

6 25 **Introduction** Intensive Care Unit (ICU) admission of a relative might lead to psychological distress  
7  
8  
9 26 and complicated grief (post-intensive care syndrome-family; PICS-F). Evidence suggests that  
10  
11  
12 27 increased distress during ICU stay increases risk of PICS-F, resulting in difficulty returning to their  
13  
14  
15 28 normal lives after the ICU experience. Effective interventions to improve PICS-F are currently lacking.  
16  
17  
18 29 In the present trial, we hypothesized that information provision using Intensive Care Unit-specific Virtual  
19  
20  
21 30 Reality for Family members/relatives (ICU-VR-F) may improve understanding of ICU and subsequently  
22  
23  
24 31 improve psychological well-being and quality of life in relatives of patients admitted to the ICU.  
25  
26

27 32 **Methods and analysis** This multicentre, clustered randomized controlled trial will be conducted from  
28  
29  
30 33 January to December, 2021, in the mixed medical-surgical ICUs of four hospitals in Rotterdam, the  
31  
32  
33 34 Netherlands. We aim to include adult relatives of 160 ICU patients, with an expected ICU length-of-stay  
34  
35  
36 35 over 72 hours. Participants will be randomized clustered per patient in a 1:1 ratio to either the  
37  
38  
39 36 intervention or control group. Participants allocated to the intervention group will receive ICU-VR-F, an  
40  
41  
42 37 information module that can be watched in VR, while the control group will receive usual care. Initiation  
43  
44  
45 38 of ICU-VR-F will be during their hospital visit, unless participants cannot visit the hospital due to COVID-  
46  
47  
48 39 19 regulations, than VR can be watched digitally. The primary objective is to study the effect of ICU-  
49  
50  
51 40 VR-F on psychological well-being and quality of life up to 6 months after ICU discharge of the patient.  
52  
53  
54 41 The secondary outcome is the degree of understanding of ICU treatment and ICU modalities.  
55

56 42 **Ethics and dissemination** The Medical Ethics Committee of the Erasmus Medical Centre,  
57  
58  
59 43 Rotterdam, the Netherlands, approved the study, and local approval was obtained from each  
60



1  
2  
3 44 participating centre (NL73670.078.20). Our findings will be disseminated by presentation of the results  
4  
5

6 45 at (inter)national conferences and publication in scientific, peer-reviewed journals.  
7  
8

9 46 **Trial registration number** This trial has been prospectively registered on the Netherlands Trial  
10

11  
12 47 Register (TrialRegister.nl, NL9220, registered January 25, 2021).  
13  
14  
15  
16  
17  
18  
19  
20  
21  
22  
23  
24  
25  
26  
27  
28  
29  
30  
31  
32  
33  
34  
35  
36  
37  
38  
39  
40  
41  
42  
43  
44  
45  
46  
47  
48  
49  
50  
51  
52  
53  
54  
55  
56  
57  
58  
59  
60

For peer review only

1  
2  
3 **48 Strengths and limitations of this study**  
4  
5

- 6 49 • A randomized controlled trial examining the effect of an intensive care unit-specific virtual reality  
7  
8  
9 50 intervention for family members/relatives (ICU-VR-F) on psychological well-being and quality of life  
10  
11  
12 51 using an innovative and uniform modality.  
13  
14  
15 52 • ICU-VR-F represents an easy applicable, safe, and immersive modality to improve communication  
16  
17  
18 53 through better information provision regarding treatment- and environment-related information  
19  
20  
21 54 about the ICU, enabling relatives to receive uniform and complete information.  
22  
23  
24 55 • ICU-VR-F is an innovative method that is generalizable and makes information easy accessible and  
25  
26  
27 56 immersive.  
28  
29  
30 57 • Blinding of patients or investigators is not possible due to the nature of the intervention.  
31  
32  
33  
34  
35  
36  
37  
38  
39  
40  
41  
42  
43  
44  
45  
46  
47  
48  
49  
50  
51  
52  
53  
54  
55  
56  
57  
58  
59  
60

## 58 INTRODUCTION

59 An Intensive Care Unit (ICU) admission is known to be a stressful experience for both patients and their  
60 relatives. As a result, relatives of ICU patients are at risk of developing several psychological symptoms,  
61 such as symptoms of post-traumatic stress disorder (PTSD), anxiety, depression, and complicated grief  
62 in the unfortunate event of a patient deceasing during ICU treatment; clinically relevant symptoms of  
63 PTSD occur in 21% of relatives of ICU patients, especially in relatives of adult patients, clinically relevant  
64 symptoms of anxiety occur in 40%, and clinically relevant symptoms of depression occur in 23%.<sup>1-11</sup>  
65 These impairments are collectively referred to as the Post-Intensive Care Syndrome Family (PICS-F).<sup>6</sup>  
66 <sup>12 13</sup>  
67 PICS-F frequently results in loss of employment, financial burden, lifestyle interference, and a profound  
68 impact on quality of life.<sup>14</sup> These consequences often last a long time and already start during ICU stay  
69 of their kin.<sup>3</sup> Important risk factors for the development of PICS-F are the unexpectedness of critical  
70 illness, the dramatic nature of the relatives' experience leading to emotional stress, the level of  
71 communication of the ICU staff, and the use medical jargon, that frequently makes it hard for the relative  
72 to understand the treatment explanation.<sup>1 8 10 11 15 16</sup> As such, relatives may witness invasive treatments  
73 with unfamiliar medical procedures and devices in an environment they do not understand. Therefore,  
74 communication between ICU staff and families is essential in the care process, and good communication  
75 and information provision improves the relatives' understanding of ICU treatment, satisfaction, limit  
76 lawsuits, and is associated with lower prevalence of PTSD during the ICU stay.<sup>5 17 18</sup> As such, good

1  
2  
3 77 information provision to relatives of ICU patients is essential in improving the relatives' comprehension  
4  
5  
6 78 of ICU procedures and ICU surrounding during the ICU stay.  
7

8  
9 79 During the COVID-19 pandemic, many hospitals worldwide disallowed visitors for all adult inpatients  
10  
11  
12 80 including all COVID-19 and non-COVID ICU patients. Relatives of ICU COVID-19 patients are therefore  
13  
14  
15 81 confronted with the impracticableness of visiting their relative in the ICU or to receive good  
16  
17  
18 82 communication from the ICU staff, which may result in a higher psychological burden.<sup>19 20</sup> In the face of  
19  
20  
21 83 mounting the increase in PICS-F-related sequelae, several interventions, such as information  
22  
23  
24 84 brochures, family conferences, and educational programs for relatives, have been tested, but did not  
25  
26  
27 85 result in a clinically meaningful improvement in psychological well-being or quality of life.<sup>21 22</sup> The COVID-  
28  
29  
30 86 19 pandemic has resulted in the disruption of an integral aspect of care in most ICUs across the world  
31  
32  
33 87 and the importance of generalizable and on demand information has been addressed. To date, a  
34  
35  
36 88 clinically meaningful, simple and generalizable intervention remains unavailable.  
37

38  
39 89 Virtual Reality (VR) is a relatively new technique that allows the user to fully immerse within a virtual  
40  
41  
42 90 environment. As such, it allows relatives to experience what the patient is experiencing during ICU  
43  
44  
45 91 treatment, possibly leading to a better comprehension of ICU stay. Information provision using VR has  
46  
47  
48 92 shown to decrease preoperative anxiety in both adult and pediatric patients, to help women and their  
49  
50  
51 93 partner to feel better prepared for cesarean delivery, to successfully deliver healthcare related  
52  
53  
54 94 information to adults with intellectual disabilities, and to be an appropriate tool to deliver additional  
55  
56  
57 95 treatment-related information to increase patients' satisfaction.<sup>23-26</sup> Additionally, exposure through VR  
58  
59  
60 96 appears to be an effective treatment modality for several mental health disorders, including PTSD,

1  
2  
3 97 depression, and anxiety, in a non-ICU setting.<sup>27-30</sup> It provides an innovative modality that is generalizable  
4  
5  
6 98 and could improve the relatives' understanding of what is happening to long-stay ICU patients, without  
7  
8  
9 99 increasing staff workload. We hypothesized that offering treatment- and environment-related information  
10  
11  
12 100 about the ICU via VR increases relatives' understanding of ICU treatment and environment and  
13  
14  
15 101 improves psychological well-being and quality of life.  
16  
17  
18  
19  
20  
21  
22  
23  
24  
25  
26  
27  
28  
29  
30  
31  
32  
33  
34  
35  
36  
37  
38  
39  
40  
41  
42  
43  
44  
45  
46  
47  
48  
49  
50  
51  
52  
53  
54  
55  
56  
57  
58  
59  
60

For peer review only

## 102 **METHODS AND ANALYSIS**

### 103 **Study design and setting**

104 This study will be a multicentre, clustered randomized trial conducted in the mixed medical-surgical ICUs  
105 of four hospitals in Rotterdam, the Netherlands. Cooperating hospitals are: the Erasmus MC (university  
106 hospital), Franciscus Gasthuis & Vlietland hospital, Ikazia hospital and Maasstad hospital (all teaching  
107 hospitals). The Medical Ethics Committee (MEC) of the Erasmus MC approved this study  
108 (NL73670.078.20, approved December 14, 2020), and local approval was obtained from the institutional  
109 ethic review boards of each participating hospital, i.e., the Franciscus Gasthuis & Vlietland hospital, the  
110 Ikazia hospital, and the Maasstad hospital. The study will be conducted from January to December  
111 2021. Participants will be followed for 6 months after patient's ICU discharge. Any modifications to the  
112 study protocol, which may impact the conduct of the study or participant safety, including changes of  
113 the study objectives, study design, study population, sample size, study procedures or significant  
114 administrative aspects, will be sent for approval to the MEC of the Erasmus MC and local approval will  
115 be obtained from the institutional ethic review boards of each participating hospital prior to  
116 implementation. Accordingly, the health authorities will be informed in accordance with local regulations.

### 117 **Study participants**

118 We aim to include relatives, or close friends in absence of relatives, of 160 ICU patients. Relatives  $\geq 18$   
119 years of age, who are a first/second degree relative of the ICU patient, are responsible for decision  
120 making, or sharing the same household are eligible for inclusion. Additionally, relatives should be able  
121 to understand the Dutch language to understand ICU-VR-F and should in possession of smartphone,

1  
2  
3 122 tablet or computer to watch ICU-VR-F at home. Multiple relatives per patient can participate; the primary  
4  
5  
6 123 contact person of the ICU patient will be approached firstly and will be invited to share the study  
7  
8  
9 124 information with other relatives that could be interested. There is no maximum number of relatives per  
10  
11  
12 125 patients that can participate. In the case of multiple relatives of the same patient participating, relatives  
13  
14  
15 126 of the same patient will be clustered to the same randomization allocation. Relatives with no formal  
16  
17  
18 127 address or relatives of patients with an expected ICU-LOS less than 72 hours will be excluded. Close  
19  
20  
21 128 friends are eligible for inclusion in the case that no relative is available. Close friends are considered  
22  
23  
24 129 close friends if they address themselves as close friends and are responsible for decision making.  
25  
26  
27 130 Relatives of patients who decease during ICU treatment will retrospectively be excluded from the main  
28  
29  
30 131 analysis.

### 32 **Intervention**

33  
34  
35  
36 133 Patients will be randomized to receive standard care with additionally ICU-VR-F (intervention group) or  
37  
38  
39 134 standard care alone (control group).

40  
41  
42 135 The Intensive Care Unit-specific Virtual Reality for relatives of ICU patients (ICU-VR-F) was based on  
43  
44  
45 136 the previously described ICU-VR intervention for ICU patients and was designed by an interdisciplinary  
46  
47  
48 137 team of three intensivists, a psychologist, a former ICU patient, and a VR/film director. Based on these  
49  
50  
51 138 focus group meetings and previous studies, the following information was included in the module: 1) an  
52  
53  
54 139 introduction by an intensivist and an ICU nurse to welcome the relative to the ICU and VR environment  
55  
56  
57 140 explaining daily movements at an ICU, 2) explanation of monitors and noises in an ICU room, 3)  
58  
59  
60 141 information regarding mechanical ventilation, intubation and tracheal tube suction, 5) necessity of

1  
2  
3 142 central/peripheral lines and IV/drips, 6) information and necessity of the treatment team and ICU  
4  
5  
6 143 workflow.<sup>31 32</sup> The ICU-specific VR module was designed with the aim to show relevant and truthful  
7  
8  
9 144 treatment- and ICU environment-related information, and was hospital specific. The point of view for the  
10  
11  
12 145 camera was the field of vision of the mock patient lying in a hospital bed. The hospital specific ICU-VR-F  
13  
14  
15 146 from the Erasmus MC can be found [here](#), from the Franciscus Gasthuis & Vlietland can be found [here](#),  
16  
17  
18 147 and from the Ikazia hospital can be found [here](#). The uniform video script can be found in the  
19  
20  
21 148 Supplementary Data.

22  
23  
24 149 Standard care comprises either of 1) a family meeting with the treating ICU physician during the first  
25  
26  
27 150 week of ICU admission, and 2) bi-weekly meetings with the treating ICU physician when patients have  
28  
29  
30 151 a stay more than 14 days according to a hospital's local protocol. Additionally, family will members will  
31  
32  
33 152 always be offered a digital/hardcopy ICU diary according to national guidelines.

### 34 35 36 153 **Study procedures**

37  
38  
39 154 Outcome variables will be collected at each time point, see *Figure 1*. The primary contact person of the  
40  
41  
42 155 ICU patient will be approached by an investigator of the research team within 2 days after ICU admission  
43  
44  
45 156 and will be asked to share the study information with other relatives. In case that other relatives were  
46  
47  
48 157 interested in participation, their contact details were shared by the primary contact person with the  
49  
50  
51 158 investigator so informed consent could be obtained. A translation of the information for participants and  
52  
53  
54 159 the informed consent form can be found in the Supplementary Data. After inclusion, they will receive a  
55  
56  
57 160 first set of questionnaires (T0), consisting of a self-composed questionnaire regarding demographics,  
58  
59  
60 161 psychological well-being , and quality of life. Participants are asked to fill in the first set of questionnaires



1  
2  
3 162 retrospectively, in order to obtain a measure of participant's anxiety and depression levels and quality  
4  
5  
6 163 of life prior to the current episode of the patient's illness leading to ICU admission. Hereafter,  
7  
8  
9 164 randomization will be done.

10  
11  
12 165 During ICU treatment, all relatives will receive standard care, which comprises either of 1) a family  
13  
14  
15 166 meeting with the treating ICU physician during the first week of ICU admission, and 2) bi-weekly  
16  
17  
18 167 meetings with the treating ICU physician when patients have a stay more than 14 days. Additionally,  
19  
20  
21 168 family will members will always be offered a digital/hardcopy ICU diary.

22  
23  
24 169 After randomization, participants in the intervention group will additionally receive ICU-VR using head-  
25  
26  
27 170 mounted display VR (Oculus Go, Irvine, CA, CE: R-CMM-OC8-MH-A). Thereafter, they receive  
28  
29  
30 171 cardboard VR glasses and an access link to watch ICU-VR-F at home, which can also be used without  
31  
32  
33 172 the cardboard VR glasses. Participants who are not allowed to visit the hospital due to COVID-19  
34  
35  
36 173 regulations, i.e., mandatory self-quarantine, inability to visit the ICU, or a limited number of visitors, will  
37  
38  
39 174 only receive ICU-VR-F using cardboard VR glasses via the access link. The number of times a  
40  
41  
42 175 participant watches ICU-VR-F will be logged. Participants have access to the module during the entire  
43  
44  
45 176 study period, including follow-up. Participants will receive a second set of questionnaires during ICU  
46  
47  
48 177 discharge of their relative to assess their understanding of ICU procedures and environment, and will  
49  
50  
51 178 receive follow-up questionnaires at 1 month, 3 months, and 6 months after ICU discharge (*Table 1*).

52  
53  
54 179 The study procedures of participants in the intervention group who are allowed to visit the hospital are  
55  
56  
57 180 presented in *Figure 2* and for those who are not allowed to visit the hospital in *Figure 3*.

1  
2  
3 181 **Randomization and masking**  
4  
5

6 182 Randomization will be on a 1:1 ratio, clustered based on the ICU patient (i.e., if multiple relatives of one  
7  
8  
9 183 ICU patient participate, they will all be assigned to the same group), stratified for study site and the  
10  
11  
12 184 ability to visit the hospital with regard to COVID-19 regulations. Randomization will be performed using  
13  
14  
15 185 a centralized internet-based randomization procedure (Castor EDC, Amsterdam, the Netherlands). Due  
16  
17  
18 186 to the nature of the intervention, blinding is not possible.  
19  
20

21 187 **Outcomes and measurements**  
22  
23

24 188 The primary endpoint is the effect of ICU-VR-F on psychological well-being and quality of life in  
25  
26  
27 189 participants up to six months after ICU discharge. Psychological well-being will be expressed as the  
28  
29  
30 190 presence and severity of PTSD-, anxiety-, and depression-related symptoms, and will be assessed  
31  
32  
33 191 using the Impact of Event Scale-Revised (IES-R) and Hospital Anxiety and Depression Scale (HADS).<sup>33</sup>  
34  
35  
36 192 <sup>34</sup> Quality of life will be assessed using the SF-36.<sup>35 36</sup> The secondary endpoint is the participants'  
37  
38  
39 193 understanding of ICU procedures, i.e., monitors, sounds and daily work practice. Understanding of ICU  
40  
41  
42 194 procedures will be assessed using a subset of the Consumer Quality Index – Relatives in the ICU (CQI-  
43  
44  
45 195 Relatives in the ICU).<sup>37</sup> Additional outcomes are adequate understanding about the ICU environment  
46  
47  
48 196 and procedures (devices, treatment team, alarm noises, procedures) and the perspectives of  
49  
50  
51 197 participants about ICU-VR-F, assessed using the Caregivers Strain Index (CSI), a self-composed  
52  
53  
54 198 'perceived stress factors' questionnaire, and a self-composed 'perspectives on the ICU-VR intervention'  
55  
56  
57 199 questionnaire.  
58  
59  
60

1  
2  
3 200 The IES-R comprises 22 items, assesses subjective distress caused by a traumatic event, and has been  
4  
5  
6 201 previously validated in ICU survivors.<sup>38 39</sup> The IES-R yields a total score (ranging from 0 to 88, with  
7  
8  
9 202 higher scores indicating more severe symptoms), and subscale scores can be calculated for symptoms  
10  
11  
12 203 of intrusion, avoidance and hyperarousal. An IES-R sum score  $\geq 24$  will be considered as PTSD.<sup>40 41</sup>  
13  
14  
15 204 The HADS comprises 14 items and is commonly used to determine the levels of anxiety and depression  
16  
17  
18 205 that a person is experiencing. A sum score  $> 8$  on either the depression (7 questions) or anxiety (7  
19  
20  
21 206 questions) subscale will be classified as depression and anxiety, respectively.<sup>33 42 43</sup>  
22  
23  
24 207 The RAND-36 consists of 8 scaled scores, which are the weighted sums of the questions in their section.  
25  
26  
27 208 Each scale is directly transformed to a scale ranging from 0 to 100 on the assumption that each question  
28  
29  
30 209 carries an equal weight. The 8 sections are vitality, physical functioning, bodily pain, general health  
31  
32  
33 210 perception, physical role functioning, emotional role functioning, social role functioning and mental  
34  
35  
36 211 health. In addition, a mental- and physical component scale can be calculated, giving a perception of a  
37  
38 212 person's physical and mental health.<sup>44</sup>  
39  
40  
41 213 The CQI-Relatives in the ICU was designed by the Healthcare Institute of the Netherlands in  
42  
43  
44 214 collaboration with several hospitals to measure the perceived quality of care by relatives of ICU  
45  
46  
47 215 patients.<sup>37</sup> The subset used in the present study was carefully tailored to the needs of the current study  
48  
49  
50 216 (Supplementary Data). Therefore, unnecessary items for this study were removed, and additional VR-  
51  
52  
53 217 specific questions were added. The subset consists of 38 items, distributed across 4 sections; 1) general  
54  
55  
56 218 questions, 2) questions regarding information provision and understanding of the ICU environment, 3)  
57  
58  
59  
60

1  
2  
3 219 questions regarding care offered to relatives and 4) questions regarding the communication with the  
4  
5  
6 220 ICU staff.  
7  
8

9 221 The self-composed perceived stress factors questionnaire was based on existing literature regarding  
10  
11  
12 222 risk factors for the development of PICS-F, including time spent for visitation, worries about the physical,  
13  
14  
15 223 cognitive and psychological state of the patient, worries about family and familiarity with an ICU. The  
16  
17  
18 224 final questionnaire comprises 18 questions ranging from 0 (Not at all) to 4 (A lot) on a Likert scale. The  
19  
20  
21 225 self-composed perspectives on the ICU-VR-F intervention questionnaire comprises 13 questions.  
22  
23  
24 226 Outcomes of these self-composed questionnaires will be used to determine different aspects of  
25  
26  
27 227 information that relatives were missing or were in need of in the current ICU-VR-F intervention. This  
28  
29  
30 228 data will be used to further improve the VR intervention and its content so it will better meet the needs  
31  
32  
33 229 of relatives. Translations of the self-composed questionnaires can be found in the Supplementary Data.  
34

### 35 36 230 **Data management**

37  
38  
39 231 Data will be uploaded, stored, and maintained on the electronic data capture (EDC) system of Castor  
40  
41  
42 232 (Castor EDC, [www.castoredc.com](http://www.castoredc.com), Amsterdam, the Netherlands). The study team will be responsible  
43  
44  
45 233 for all data entry and quality control activities. The data will be checked by at least two persons from the  
46  
47  
48 234 study team and will be stored for at least 15 years on either the Castor EDC server or as a hardcopy in  
49  
50  
51 235 the ICUs of the participating hospitals. Questionnaires will be sent digitally using Castor EDC or  
52  
53  
54 236 hardcopy via postal mail whenever requested.  
55  
56  
57  
58  
59  
60

1  
2  
3 237 To maintain anonymity, data will be coded with a number and this number will be the only reference to  
4  
5  
6 238 identification. The principal investigator is the only one in possession of the translation key, making it  
7  
8  
9 239 impossible to link data to the participant.  
10

#### 11 12 240 **Sample size calculation**

13  
14  
15 241 To the best of our knowledge, this study will be the first of its kind for which no previous conducted  
16  
17  
18 242 studies can be used to define the expected effect estimate. Due to expected non-normality of PTSD,  
19  
20  
21 243 depression, and anxiety scores at 6 months after ICU discharge, this calculation could represent an  
22  
23  
24 244 overestimation of the effect estimate. Based on our clinical experience, and experience with a pilot study  
25  
26  
27 245 studying the effects of ICU-VR on ventilated ICU patients for which we found Cohen's  $d$  effect size of  
28  
29  
30 246 0.77, we expect that a clinically meaningful Cohen's  $d$  effect size of 0.55 could be expected in relatives.<sup>32</sup>  
31  
32  
33 247 When taking this into account, using a two-sided alpha of 0.05, and a power of 0.80, assuming an  
34  
35  
36 248 expected loss-to-follow-up of 20%, we aim to include relatives of 160 ICU patients. We expect a needed  
37  
38  
39 249 time of six months on the admission rate history of the participating hospitals.  
40  
41  
42  
43  
44  
45  
46  
47  
48  
49  
50  
51  
52  
53  
54  
55  
56  
57  
58  
59  
60

1  
2  
3 250 **Statistical analysis**  
4  
5

6  
7 251 Baseline demographics and treatment-related characteristics will be quantified using descriptive  
8  
9 252 statistics. Continuous variables will be presented as mean (SD) or as median (95% range), based on  
10  
11  
12 253 the distribution of the variable. Categorical variables will be presented as absolute number and relative  
13  
14  
15 254 frequency.

16  
17  
18 255 A sensitivity analysis will be performed in which missing data (completely) at random will be dealt with  
19  
20  
21 256 utilizing both multiple imputation according to the Markov-chain Monte Carlo and the Last Observation  
22  
23  
24 257 Carried Forward Method.<sup>45 46</sup> We will correct for multiple testing using the false discovery rate with a  
25  
26  
27 258 maximum of 5% false negatives.<sup>47</sup>

28  
29  
30 259 For the primary outcome, the effect of ICU-VR on PTSD, anxiety, depression, and quality of life, we will  
31  
32  
33 260 analyse differences in the IES-R sum score (PTSD), the HADS anxiety- and depression score, and the  
34  
35  
36 261 RAND-36 subscales (quality of life) between participants in the intervention and the control group at  
37  
38  
39 262 each follow-up time-point (e.g., 1 month, 3 months, and 6 months after ICU discharge) using a mixed  
40  
41  
42 263 effect linear regression model with a random intercept for each study site and/or participants based on  
43  
44  
45 264 model comparisons using the Akaike information criteria. In case of multiple participants for one ICU  
46  
47  
48 265 patient, these participants will be considered as clustered, and a random intercept for each cluster will  
49  
50  
51 266 be used. Between-group differences in variables of interest throughout follow-up were studied by  
52  
53  
54 267 introducing the product of time\*treatment group to the model.

55  
56  
57 268 Differences in the proportion of participants in the intervention group and participants in the control group  
58  
59  
60 269 with clinically relevant symptoms of PTSD (IES-R sum score  $\geq 22$ ), depression (HADS depression score

1  
2  
3 270 > 8) or anxiety (HADS anxiety score > 8) will be analysed using a mixed effect logistic regression model.  
4  
5

6 271 Also, changes from baseline will be computed dividing the parameter value at specific time points into  
7  
8

9 272 the baseline value expressed as percentile changes (% of baseline). The magnitude of change among  
10  
11

12 273 PTSD, depression, and anxiety at specific time points and differences will be tested using a mixed effect  
13  
14

15 274 linear regression model.  
16  
17

18 275 For the secondary outcome, understanding of the ICU and quality of care in the ICU, we will analyse  
19  
20

21 276 differences between study groups per question using a mixed effect logistic regression model. By  
22  
23

24 277 combining the numeric values of the answers given, a sum score and subscales for the different sections  
25  
26

27 278 can be calculated for each participant. The association between the intervention and these sum scores  
28  
29

30 279 will be examined using mixed effect linear regression models.  
31  
32

33 280 The explorative outcomes, the perceived stress factors and the perspectives of relatives on the ICU-  
34  
35

36 281 VR-F intervention, will be described using descriptive statistics. Differences in continuous outcomes of  
37  
38

39 282 the self-composed questionnaire regarding perceived stress factors and the sum score of the CSI will  
40  
41

42 283 be analysed using mixed effect linear regression models. Differences in categorical outcomes of the  
43  
44

45 284 self-composed questionnaire regarding perceived stress factors will be analysed using mixed effect  
46  
47

48 285 logistic regression models.  
49  
50

51 286 The main analyses will be conducted per protocol. In these, all patients who have received ICU-VR-F,  
52  
53

54 287 either both in the hospital as at home or only at home, will be compared with those who did not, and  
55  
56

57 288 patients of whom the relative has deceased during ICU treatment will be excluded. To determine  
58  
59

60 289 whether there is a difference in effect between having watched ICU-VR-F the first time in the hospital

1  
2  
3 290 and having watched the ICU-VR-F only at home, we will use a dummy variables (ICU-VR-F in the  
4  
5  
6 291 hospital and at home / ICU-VR-F only at home / no ICU-VR-F) instead of the randomization variables in  
7  
8  
9 292 the mixed effects regression models, and determine whether that dummy variable has a significant  
10  
11  
12 293 contribution to the model. We will additionally perform an analysis in which 1) patients who did not watch  
13  
14  
15 294 ICU-VR-F in the hospital will be excluded and 2) patients who watched ICU-VR in the hospital will be  
16  
17  
18 295 excluded to determine whether there is a difference in effect.

19  
20  
21 296 All data will be gathered using Castor EDC (Castor EDC, Amsterdam, the Netherlands). Analyses will  
22  
23  
24 297 be performed using SPSS (version 27.0; SPSS Inc., Chicago, IL) and R for Statistics (R Foundation for  
25  
26  
27 298 Statistical Computing, Vienna, Austria, 2015). A  $P$ -value  $\leq 0.05$  will be considered statistically significant.

### 29 300 **Ethics and dissemination**

31  
32  
33 300 This study will be conducted in accordance with the principles of the Declaration of Helsinki (version  
34  
35  
36 301 October 2013; www.wma.net) and in accordance with the Medical Research Involving Human Subjects  
37  
38  
39 302 Act (WMO) and other guidelines, regulations, and acts. We received approval from the Medical Ethics  
40  
41  
42 303 Committee (MEC) of the Erasmus MC, and local approval has been obtained from the institutional ethic  
43  
44  
45 304 review boards of each participating hospital, i.e., the Franciscus Gasthuis & Vlietland hospital, the Ikazia  
46  
47  
48 305 hospital, and the Maasstad hospital. If deviation from the protocol is necessary, then it will not be  
49  
50  
51 306 implemented without the prior review and approval of the MEC of the Erasmus MC and each  
52  
53  
54 307 participating hospital's institutional ethic review board. Signed informed consent will be obtained from  
55  
56  
57 308 all participants. Previous research demonstrated that (ICU-)VR is safe.<sup>23 31 32 48</sup> Informed-consent forms  
58  
59  
60 309 will be kept in a locked cabinet in a limited-access room at the Erasmus MC. Data will be archived for



1  
2  
3 310 15 years. The handling of personal data complies with the Dutch law. On completion of the study, its  
4  
5  
6 311 findings will be published in peer-reviewed journals and presented at national and international scientific  
7  
8  
9 312 conferences to publicize the research to healthcare professionals, health services authorities and the  
10  
11  
12 313 public. A summary of the results will be made available to the study patients if requested.  
13  
14

15  
16 314 **Patient and public involvement statement**  
17

18  
19 315 Patients and/or the public were not involved in the design, or conduct, or reporting, or dissemination  
20  
21  
22 316 plans of this research.  
23  
24  
25  
26  
27  
28  
29  
30  
31  
32  
33  
34  
35  
36  
37  
38  
39  
40  
41  
42  
43  
44  
45  
46  
47  
48  
49  
50  
51  
52  
53  
54  
55  
56  
57  
58  
59  
60

317 **Tables****Table 1.** Questionnaire per follow-up moment.

|                                                                 | <b>T0.</b>             | <b>T1.</b>       | <b>T2/T3/T4</b>             |
|-----------------------------------------------------------------|------------------------|------------------|-----------------------------|
| <b>Questionnaire:</b>                                           | At ICU admission       | At ICU discharge | Follow-up<br>(1/3/6 months) |
| Baseline demographics                                           | X                      | X                | X                           |
| HADS<br>(Anxiety and Depression)                                | X<br>(retrospectively) |                  | X                           |
| IES-R<br>(Post-Traumatic Stress Disorder)                       |                        | X                | X                           |
| RAND-36<br>Quality of Life                                      | X<br>(retrospectively) |                  | X                           |
| Subset CQI-Relatives in the ICU<br>Understanding ICU procedures |                        | X                |                             |
| CSI<br>Caregiving Concerns                                      |                        |                  | X                           |
| Perceived Stress Factors                                        |                        | X                |                             |
| Perspectives on the ICU-VR-F<br>intervention                    |                        | X                | X                           |

Abbreviations: CSI, caregivers strain index; CQI, consumer quality index; HADS, hospital anxiety and depression scale; ICU, intensive care unit; ICU-VR-F, intensive care unit-specific virtual reality for relatives; RAND-36; research and development 36-item questionnaire.

318

1  
2  
3  
4 319 **Figures**

5  
6  
7 320 **Figure 1. Flow-diagram of the study.**

8  
9 321 Abbreviations: CSI, caregivers strain index; HADS, hospital anxiety and depression scale; ICU,  
10 322 intensive care unit; ICU-LOS, Intensive Care Unit length-of-stay; ICU-VR-F, Intensive Care Unit-  
11  
12  
13  
14  
15 323 specific Virtual Reality for Family members/relatives; IES-R, impact of event scale-revised; RAND-36,  
16  
17  
18 324 research and development 36-item questionnaire.

19  
20  
21  
22 325 **Figure 2. Overview of procedures for relatives in the intervention group who are allowed to visit the**  
23  
24  
25 326 **hospital.**

26  
27  
28  
29 327 **Figure 3. Overview of procedures for relatives in the intervention group who are not allowed to visit the**  
30  
31 328 **hospital.**

## 329 References

- 330 1. Azoulay E, Pochard F, Kentish-Barnes N, et al. Risk of post-traumatic stress symptoms in family  
331 members of intensive care unit patients. *Am J Respir Crit Care Med* 2005;**171**(9):987-94.
- 332 2. Jones C, Skirrow P, Griffiths RD, et al. Post-traumatic stress disorder-related symptoms in relatives  
333 of patients following intensive care. *Intensive Care Med* 2004;**30**(3):456-60.
- 334 3. Anderson WG, Arnold RM, Angus DC, et al. Posttraumatic stress and complicated grief in family  
335 members of patients in the intensive care unit. *J Gen Intern Med* 2008;**23**(11):1871-76.
- 336 4. Gries CJ, Engelberg RA, Kross EK, et al. Predictors of symptoms of posttraumatic stress and  
337 depression in family members after patient death in the ICU. *Chest* 2010;**137**(2):280-87.
- 338 5. Lautrette A, Darmon M, Megarbane B, et al. A communication strategy and brochure for relatives of  
339 patients dying in the ICU. *N Engl J Med* 2007;**356**(5):469-78.
- 340 6. Davidson JE, Jones C, Bienvenu OJ. Family response to critical illness: Postintensive care syndrome–  
341 family. *Crit Care Med* 2012;**40**(2):618-24.
- 342 7. Anderson WG, Arnold RM, Angus DC, et al. Passive decision-making preference is associated with  
343 anxiety and depression in relatives of patients in the intensive care unit. *J Crit Care*  
344 2009;**24**(2):249-54.
- 345 8. Siegel MD, Hayes E, Vanderwerker LC, et al. Psychiatric illness in the next of kin of patients who die  
346 in the intensive care unit. *Crit Care Med* 2008;**36**(6):1722-28.
- 347 9. Shaw RJ, Bernard RS, DeBlois T, et al. The relationship between acute stress disorder and  
348 posttraumatic stress disorder in the neonatal intensive care unit. *Psychosomatics*  
349 2009;**50**(2):131-37.

- 1  
2  
3 350 10. Lefkowitz DS, Baxt C, Evans JR. Prevalence and correlates of posttraumatic stress and postpartum  
4  
5 351 depression in parents of infants in the Neonatal Intensive Care Unit (NICU). *J Clin Psychol Med*  
6  
7 352 *Settings* 2010;**17**(3):230-37.
- 9  
10  
11 353 11. Miles MS, Holditch-Davis D, Schwartz TA, et al. Depressive symptoms in mothers of prematurely  
12  
13 354 born infants. *J Dev Behav Pediatr* 2007;**28**(1):36-44.
- 15  
16 355 12. Needham DM, Davidson J, Cohen H, et al. Improving long-term outcomes after discharge from  
17  
18 356 intensive care unit: report from a stakeholders' conference. *Crit Care Med* 2012;**40**(2):502-9.
- 20  
21  
22 357 13. Harvey MA, Davidson JE. Postintensive Care Syndrome: Right Care, Right Now...and Later. *Crit*  
23  
24 358 *Care Med* 2016;**44**(2):381-5.
- 26  
27 359 14. van Beusekom I, Bakhshi-Raiez F, de Keizer NF, et al. Reported burden on informal caregivers of  
28  
29 360 ICU survivors: a literature review. *Crit Care* 2016;**20**:16.
- 31  
32  
33 361 15. Vermeir J, Holley A, Lipman J. "Not out of the woods"--a wife's perspective: bedside communication.  
34  
35 362 *Intensive Care Med* 2016;**42**(3):446-47.
- 37  
38 363 16. Balluffi A, Kassam-Adams N, Kazak A, et al. Traumatic stress in parents of children admitted to the  
39  
40 364 pediatric intensive care unit. *Pediatr Crit Care Med* 2004;**5**(6):547-53.
- 42  
43 365 17. Black MD, Vigorito MC, Curtis JR, et al. A multifaceted intervention to improve compliance with  
44  
45 366 process measures for ICU clinician communication with ICU patients and families. *Crit Care*  
46  
47 367 *Med* 2013;**41**(10):2275-83.
- 49  
50  
51 368 18. Shirley ED, Sanders JO. Patient satisfaction: Implications and predictors of success. *J Bone Joint*  
52  
53 369 *Surg Am* 2013;**95**(10):e69.
- 55  
56 370 19. Dorman-Ilan S, Hertz-Palmor N, Brand-Gothelf A, et al. Anxiety and Depression Symptoms in  
57  
58 371 COVID-19 Isolated Patients and in Their Relatives. *Front Psychiatry* 2020;**11**:581598.
- 60

- 1  
2  
3 372 20. Montauk TR, Kuhl EA. COVID-related family separation and trauma in the intensive care unit.  
4  
5 373 Psychol Trauma 2020;**12**(S1):S96-S97.  
6  
7  
8  
9 374 21. Shafipour V, Moosazadeh M, Jannati Y, et al. The effect of education on the anxiety of a family with  
10  
11 375 a patient in critical care unit: a systematic review and meta-analysis. Electronic physician  
12  
13 376 2017;**9**(3):3918.  
14  
15  
16 377 22. Zante B, Camenisch SA, Schefold JC. Interventions in Post-Intensive Care Syndrome-Family: A  
17  
18 378 Systematic Literature Review. Crit Care Med 2020.  
19  
20  
21 379 23. Bekelis K, Calnan D, Simmons N, et al. Effect of an Immersive Preoperative Virtual Reality  
22  
23 380 Experience on Patient Reported Outcomes: A Randomized Controlled Trial. Ann Surg  
24  
25 381 2017;**265**(6):1068-73.  
26  
27  
28  
29 382 24. Koo CH, Park JW, Ryu JH, et al. The Effect of Virtual Reality on Preoperative Anxiety: A Meta-  
30  
31 383 Analysis of Randomized Controlled Trials. J Clin Med 2020;**9**(10).  
32  
33  
34 384 25. Ryu JH, Park SJ, Park JW, et al. Randomized clinical trial of immersive virtual reality tour of the  
35  
36 385 operating theatre in children before anaesthesia. Br J Surg 2017;**104**(12):1628-33.  
37  
38  
39  
40 386 26. Noben L, Goossens S, Truijens SEM, et al. A Virtual Reality Video to Improve Information Provision  
41  
42 387 and Reduce Anxiety Before Cesarean Delivery: Randomized Controlled Trial. JMIR Ment Health  
43  
44 388 2019;**6**(12):e15872.  
45  
46  
47 389 27. Maples-Keller JL, Bunnell BE, Kim SJ, et al. The Use of Virtual Reality Technology in the Treatment  
48  
49 390 of Anxiety and Other Psychiatric Disorders. Harv Rev Psychiatry 2017;**25**(3):103-13.  
50  
51  
52 391 28. Mishkind MC, Norr AM, Katz AC, et al. Review of Virtual Reality Treatment in Psychiatry: Evidence  
53  
54 392 Versus Current Diffusion and Use. Curr Psychiatry Rep 2017;**19**(11):80.  
55  
56  
57  
58 393 29. Kothgassner OD, Goreis A, Kafka JX, et al. Virtual reality exposure therapy for posttraumatic stress  
59  
60 394 disorder (PTSD): a meta-analysis. Eur J Psychotraumatol 2019;**10**(1):1654782.

- 1  
2  
3 395 30. Wechsler TF, Kumpers F, Muhlberger A. Inferiority or Even Superiority of Virtual Reality Exposure  
4  
5 396 Therapy in Phobias?-A Systematic Review and Quantitative Meta-Analysis on Randomized  
6  
7 397 Controlled Trials Specifically Comparing the Efficacy of Virtual Reality Exposure to Gold  
8  
9 Standard in vivo Exposure in Agoraphobia, Specific Phobia, and Social Phobia. *Front Psychol*  
10 398  
11 2019;**10**:1758.  
12 399  
13  
14  
15 400 31. Vlaker JH, Wils E-J, van Bommel J, et al. Virtual reality tailored to the needs of post-ICU patients: a  
16  
17 401 safety and immersiveness study in healthy volunteers. *Critical Care Explorations*  
18  
19 402 2021;**3**(5):e0388.  
20  
21  
22  
23 403 32. Vlaker JH, Wils E-J, Van Bommel J, et al. Intensive Care specific Virtual Reality (ICU-VR) to improve  
24  
25 404 Post-Intensive Care Syndrome-related psychological sequelae in survivors of critical illness.  
26  
27 405 *ICMx* 2020;**8**(suppl.2).  
28  
29  
30 406 33. Zigmond AS, Snaith RP. The hospital anxiety and depression scale. *Acta Psychiatr Scand*  
31  
32 407 1983;**67**(6):361-70.  
33  
34  
35  
36 408 34. Weiss DS. The impact of event scale: revised. Cross-cultural assessment of psychological trauma  
37  
38 409 and PTSD: Springer, 2007:219-38.  
39  
40  
41 410 35. Ware JE, Jr., Sherbourne CD. The MOS 36-item short-form health survey (SF-36). I. Conceptual  
42  
43 411 framework and item selection. *Med Care* 1992;**30**(6):473-83.  
44  
45  
46 412 36. Aaronson NK, Muller M, Cohen PD, et al. Translation, validation, and norming of the Dutch language  
47  
48 413 version of the SF-36 Health Survey in community and chronic disease populations. *J Clin*  
49  
50 414 *Epidemiol* 1998;**51**(11):1055-68.  
51  
52  
53  
54 415 37. Rensen A, van Mol MM, Menheere I, et al. Quality of care in the intensive care unit from the  
55  
56 416 perspective of patient's relatives: development and psychometric evaluation of the consumer  
57  
58 417 quality index 'R-ICU'. *BMC Health Serv Res* 2017;**17**(1):77.  
59  
60

- 1  
2  
3 418 38. Bruck E, Schandl A, Bottai M, et al. The impact of sepsis, delirium, and psychological distress on  
4  
5 419 self-rated cognitive function in ICU survivors—a prospective cohort study. *J Intensive Care*  
6  
7 420 2018;**6**:2.  
8  
9  
10  
11 421 39. Bienvenu OJ, Williams JB, Yang A, et al. Posttraumatic stress disorder in survivors of acute lung  
12  
13 422 injury: evaluating the Impact of Event Scale-Revised. *Chest* 2013;**144**(1):24-31.  
14  
15  
16 423 40. Creamer M, Bell R, Failla S. Psychometric properties of the impact of event scale—revised. *Behav*  
17  
18 424 *Res Ther* 2003;**41**(12):1489-96.  
19  
20  
21 425 41. de Miranda S, Pochard F, Chaize M, et al. Postintensive care unit psychological burden in patients  
22  
23 426 with chronic obstructive pulmonary disease and informal caregivers: a multicenter study. *Crit*  
24  
25 427 *Care Med* 2011;**39**(1):112-18.  
26  
27  
28  
29 428 42. Bjelland I, Dahl AA, Haug TT, et al. The validity of the Hospital Anxiety and Depression Scale: an  
30  
31 429 updated literature review. *J Psychosom Res* 2002;**52**(2):69-77.  
32  
33  
34 430 43. Sukantarat KT, Williamson RC, Brett SJ. Psychological assessment of ICU survivors: a comparison  
35  
36 431 between the Hospital Anxiety and Depression scale and the Depression, Anxiety and Stress  
37  
38 432 scale. *Anaesthesia* 2007;**62**(3):239-43.  
39  
40  
41  
42 433 44. Ware JE, Kosinski M, Keller S. SF-36 physical and mental health summary scales. A user's manual  
43  
44 434 2001:1994.  
45  
46  
47 435 45. Lacerda M, Ardington C, Leibbrandt M. Sequential regression multiple imputation for incomplete  
48  
49 436 multivariate data using Markov chain Monte Carlo. 2007.  
50  
51  
52  
53 437 46. Lydersen S. Last observation carried forward. *Tidsskr Nor Laegeforen* 2019;**139**(9).  
54  
55  
56 438 47. Benjamini Y, Hochberg Y. Controlling the false discovery rate: a practical and powerful approach to  
57  
58 439 multiple testing. *Journal of the Royal statistical society: series B (Methodological)*  
59  
60 440 1995;**57**(1):289-300.



1  
2  
3 441 48. Turon M, Fernandez-Gonzalo S, Jodar M, et al. Feasibility and safety of virtual-reality-based early  
4  
5 442 neurocognitive stimulation in critically ill patients. Ann Intensive Care 2017;7(1):81.  
6  
7  
8  
9  
10  
11  
12  
13  
14  
15  
16  
17  
18  
19  
20  
21  
22  
23  
24  
25  
26  
27  
28  
29  
30  
31  
32  
33  
34  
35  
36  
37  
38  
39  
40  
41  
42  
43  
44  
45  
46  
47  
48  
49  
50  
51  
52  
53  
54  
55  
56  
57  
58  
59  
60

For peer review only

1  
2  
3  
4 443 **Declarations**

5  
6 444 **Authors' contributions**

7  
8  
9 445 J.V., J.v.B., E.W., D.G., and M.v.G. conceived the study and initiated the study design. M.v.G. is the  
10  
11  
12 446 coordinating investigator and grant holder. D.G. is the principal investigator. T.K. provided statistical  
13  
14  
15 447 expertise in the clinical trial design, and J.V. and T.K. wrote the statistical analysis plan. J.v.B., E.W.,  
16  
17  
18 448 J.L., and A.S. are the local principal investigators at each study site. All the authors contributed to the  
19  
20  
21 449 refinement of the study protocol and approved the final manuscript. J.V. and M.v.B. wrote the first  
22  
23  
24 450 manuscript draft. J.V. and M.H. composed the questionnaires used in the study. J.V. and M.v.B. will  
25  
26  
27 451 collect the data and conduct the study.

28  
29  
30 452 **Funding statement**

31  
32  
33 453 This study was supported by DSW (for the HORIZON-IC project; no grant number available), Stichting  
34  
35  
36 454 Theia (grant number: 2020286), Stichting SGS (grant number: 2020355), and BeterKeten (for the  
37  
38  
39 455 HORIZON-IC project; no grant number available). The funding sources had no role in the design of the  
40  
41  
42 456 study and collection, analysis, and interpretation of data nor in writing the manuscript.

43  
44  
45 457 **Competing interests statement**

46  
47  
48 458 The authors declare that they have no conflicting or competing interests to disclose.

49  
50  
51  
52 459 **Patient and public involvement statement**

53  
54  
55 460 Patients and/or the public were not involved in the design, or conduct, or reporting, or dissemination  
56  
57  
58 461 plans of this research.

1  
2  
3  
4  
5  
6  
7  
8  
9  
10  
11  
12  
13  
14  
15  
16  
17  
18  
19  
20  
21  
22  
23  
24  
25  
26  
27  
28  
29  
30  
31  
32  
33  
34  
35  
36  
37  
38  
39  
40  
41  
42  
43  
44  
45  
46  
47  
48  
49  
50  
51  
52  
53  
54  
55  
56  
57  
58  
59  
60

462 **Data Sharing statement**

463 The de-identified individual clinical trial participant-level data will be shared as supplementary material  
464 when publishing about the findings of the study.

For peer review only

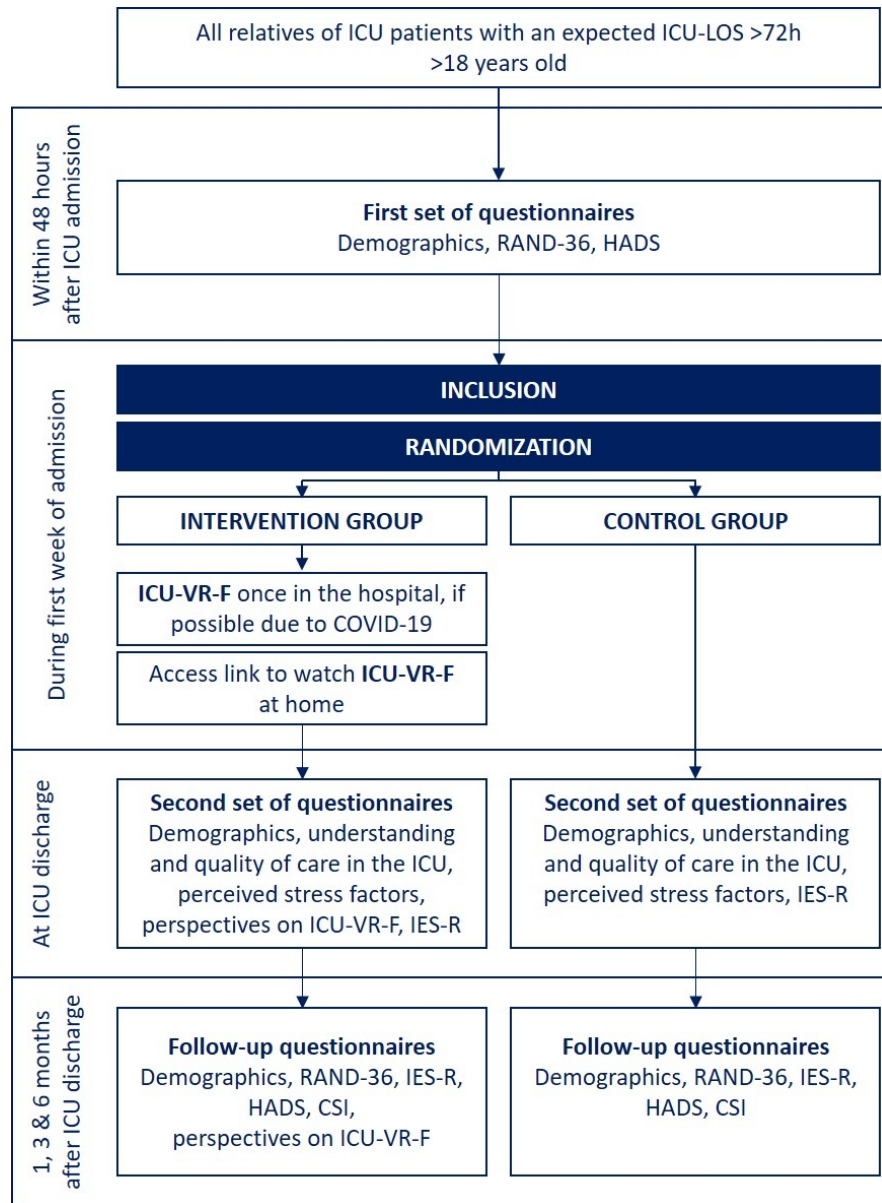

Figure 1. Flow-diagram of the study. Abbreviations: CSI, caregivers strain index; HADS, hospital anxiety and depression scale; ICU, intensive care unit; ICU-LOS, Intensive Care Unit length-of-stay; ICU-VR-F, Intensive Care Unit-specific Virtual Reality for Family members/relatives; IES-R, impact of event scale-revised; RAND-36, research and development 36-item questionnaire.

147x200mm (150 x 150 DPI)

1  
2  
3  
4  
5  
6  
7  
8  
9  
10  
11  
12  
13  
14  
15  
16  
17  
18  
19  
20  
21  
22  
23  
24  
25  
26  
27  
28  
29  
30  
31  
32  
33  
34  
35  
36  
37  
38  
39  
40  
41  
42  
43  
44  
45  
46  
47  
48  
49  
50  
51  
52  
53  
54  
55  
56  
57  
58  
59  
60

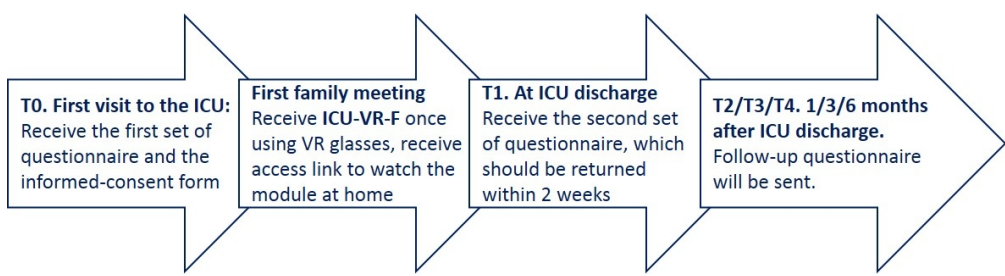

Figure 2. Overview of procedures for relatives in the intervention group who are allowed to visit the hospital.

199x52mm (150 x 150 DPI)

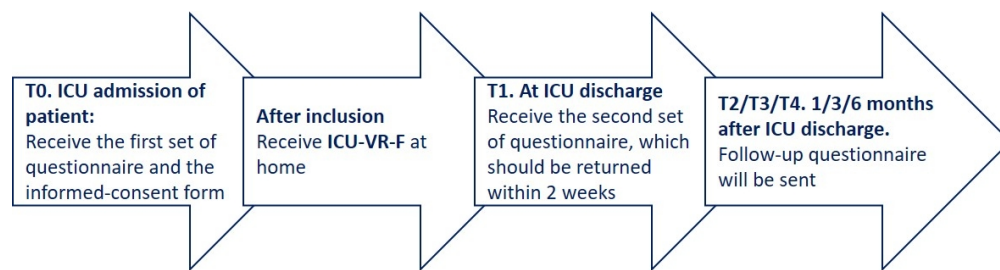

Figure 3. Overview of procedures for relatives in the intervention group who are not allowed to visit the hospital.

199x52mm (150 x 150 DPI)

## Supplemental Data

Supplement to: Johan H. Vlake, Jasper van Bommel, Evert-Jan Wils, Tim I.M. Korevaar, Merel E. Hellemons, Eva Klijn, Anna F.C. Schut, Joost A.M. Labout, Marten P. van Bavel, Margo M.C. van Mol, Diederik Gommers, Michel E. van Genderen. Virtual reality for relatives of ICU patients to improve psychological sequelae: study protocol for a multicentre, randomized controlled trial.

# Content

**Supplementary data 1.** Translation of the video script for the ICU-VR-F intervention. .... 3

**Supplementary data 2.** Translation of the information for participants and informed consent form.  
 ..... 11

    Participant information about participation in medical research. .... 12

    Informed consent form for participants ..... 22

**Supplementary data 3.** Translation of the self-composed questionnaires..... 23

    Questionnaire about your experiences in the Intensive Care Unit. .... 24

    Questions about your perspectives on the ICU-VR-F intervention. .... 29

    Questions about perceived stress factors during your relative's Intensive Care Unit treatment. ... 32

For peer review only

1  
2  
3  
4  
5  
6  
7  
8  
9  
10  
11  
12  
13  
14  
15  
16  
17  
18  
19  
20  
21  
22  
23  
24  
25  
26  
27  
28  
29  
30  
31  
32  
33  
34  
35  
36  
37  
38  
39  
40  
41  
42  
43  
44  
45  
46  
47  
48  
49  
50  
51  
52  
53  
54  
55  
56  
57  
58  
59  
60



1  
2  
3  
4  
5  
6  
7  
8  
9  
10  
11  
12  
13  
14  
15  
16  
17  
18  
19  
20  
21  
22  
23  
24  
25  
26  
27  
28  
29  
30  
31  
32  
33  
34  
35  
36  
37  
38  
39  
40  
41  
42  
43  
44  
45  
46  
47  
48  
49  
50  
51  
52  
53  
54  
55  
56  
57  
58  
59  
60

**Supplementary data 1.** Translation of the video script for the ICU-VR-F intervention.

For peer review only

1  
2  
3 **Scene 1.** Introduction by an ICU physician and a nurse.  
4

5 *Setting: The ICU physician and nurse are placed in front of the ICU.*  
6  
7

8 **ICU physician:** Hello, welcome to this virtual environment. My name is '**name physician**', one  
9 of the physicians in this ICU.

10  
11 **ICU nurse:** Hello, I am '**name nurse**', one of the nurses in this ICU.  
12

13 **ICU physician:** You receive this information because your relative has been admitted to the  
14 ICU. In this virtual environment, you will experience different facets of an ICU  
15 treatment, and receive explanation about the treatment in an Intensive Care  
16 Unit.  
17

18 **ICU nurse:** We will join you during this experience, but we will first lay you down on an ICU  
19 bed.  
20

21 *Setting: The relative will be virtually installed on an ICU bed during a fade in-fade out.*  
22  
23

24 **ICU nurse:** We will now bring you to an ICU room.  
25

26 *Setting: The ICU physician and ICU nurse will bring the relative to one of the ICU rooms while walking  
27 over the intensive care department.*  
28  
29

30 **Voice-over:** Intensive care means intensive and special care for critically ill patients, where  
31 the most important vital functions, such as the respiratory rate, oxygen  
32 saturation, and heart rate, can be monitored and supported, if needed.  
33 Therefore, this department is different from other departments. The intensive  
34 care department consists of several one-patient ICU rooms and a post for  
35 nurses located in the middle of the department. In an ICU room, circumstances  
36 and materials are available to offer critically ill patients the optimal treatment.  
37 Moreover, the chances of hospital acquired infections and medication failures  
38 are minimal, and a quiet environment is provided. If you look around, you'll see  
39 the intensive care department. At the nurse post, nurses are present  
40 throughout the day, as are monitors. Nurses can also monitor patients  
41 physically through the windows of the room, which allows nurses to be able to  
42 continuously keep an eye on your relative.  
43  
44

45 *Setting: The relative arrives at the ICU room, and the ICU physician and ICU nurse place the relative  
46 on the bed in the ICU room.*  
47  
48

49  
50 **ICU physician:** We are now entering an ICU room. Here, you'll receive an explanation about  
51 intensive care treatment. We will first explain the devices in the room, which  
52 are placed next to you. We will now leave the room and will come back after  
53 the explanation.  
54

55 *Setting: The ICU physician and ICU nurse will leave the room.*  
56  
57  
58  
59  
60

1  
2  
3 **Scene 2.** Explanation of the devices and alarm noises.  
4

5 **Voice-over:** There are several devices next to you, such as a monitor, medication pumps  
6 and a mechanical ventilator; look around you. These devices are needed to  
7 monitor your relative. Each device has its own functions and alarm noise. We  
8 will now explain these to you.  
9

10 *Setting: The surveillance monitor is outlined.*  
11  
12

13 **Voice-over:** When you look to your left, you'll see the surveillance monitor.  
14

15 *Setting: A white arrow appears that points from the surveillance monitor to an explanation window in*  
16 *front of the relative, where the surveillance monitor is animated.*  
17

18 **Voice-over:** When you look forward again, we will explain the function of the surveillance  
19 monitor. The surveillance monitor monitors your relative's heart rate, blood  
20 pressure, respiratory rate, and oxygen saturation. If, for instance, your  
21 relative's blood pressure is too low, the following alarm signal is produced.  
22

23 <ALARM SIGNAL SURVEILLANCE MONITOR>  
24

25 *Setting: The explanation window in front of the relative disappears. The medication pumps are outlined.*  
26

27 **Voice-over:** If you look to your right, you'll see the medication pumps.  
28

29 *Setting: A white arrow appears that points from the medication pumps to an explanation window in front*  
30 *of the relative, where the medication pumps are animated.*  
31

32  
33 **Voice-over:** These pumps are used to give medication. When you hear the following sound,  
34 <ALARM SIGNAL MEDICATION PUMPS>  
35  
36 the nurse is warned that your relative's medication is almost empty.  
37

38 *Setting: The explanation about medication pumps disappears, and an animation appears in the*  
39 *explanation window explaining intubation and mechanical ventilation.*  
40

41 **Voice-over:** Because your relative was critically ill, we can decide to support your relative's  
42 breathing. This was done to maintain the appropriate amount of oxygen in your  
43 relative's body. To support the breathing, we inserted a tracheal tube through  
44 the mouth into the trachea. Because this procedure is often uncomfortable,  
45 your relative will be sedated during the insertion of the tube. At the end of the  
46 tube, there is a small air balloon, which is filled with air. This balloon prevents  
47 the leakage of oxygen and the contents of the stomach from entering the lungs.  
48 Due to the placement of the tube between the vocal cords, patients cannot talk  
49 when they are intubated. When the lungs have sufficiently recovered, the  
50 tracheal tube can be removed. The tracheal tube is frequently cleaned by  
51 suctioning the tube. Hereby, mucus will be removed to prevent infections.  
52 Sometimes, it will be enough to do this once, but this has to be repeated often.  
53

54 *Setting: The explanation window disappears. The mechanical ventilator is outlined.*  
55  
56

57  
58 **Voice-over:** If you look to your left, you'll see the mechanical ventilator.  
59  
60

1  
2  
3 *Setting: A white arrow appears that points from the mechanical ventilator to an explanation window in*  
4 *front of the relative, where the mechanical ventilated is animated.*  
5  
6

7 **Voice-over:** When you look in front of you, we will give you a further explanation about the  
8 mechanical ventilator. The mechanical ventilator supports your relative's  
9 breathing. If you hear the following sound,  
10  
11 <ALARM SIGNAL MECHANICAL VENTILATOR>  
12  
13 the nurse is warned.

14  
15 *Setting: The animation of the mechanical ventilator disappears, and the explanation about prone*  
16 *positioning is animated in the explanation window.*  
17

18  
19 **Voice-over:** As a consequence of several diseases, including coronavirus, the alveoli and  
20 pulmonary vessels can partially close, resulting in the body being unable to  
21 absorb sufficient oxygen. There are relatively more alveoli in the back of the  
22 lungs. In the occasion mechanical ventilation in a normal position is no longer  
23 effective, it can be decided to ventilate patients in the prone position or laying  
24 on their stomach. The alveoli and pulmonary vessels in the back of the lungs  
25 are thereby better ventilated, hopefully resulting in better absorption of oxygen.  
26 Often, there is an immediate improvement in the mechanical ventilation  
27 conditions after prone positioning. To prevent pressure marks on the face, the  
28 eyes are protected and the head is placed in a position to the side. Over time,  
29 the positive effect of this prone position diminishes, and the patient is again  
30 placed on their back. Therefore, it is often decided to ventilate in prone  
31 positioning for several hours and thereafter again on the back for several  
32 hours. Because prone positioning can be uncomfortable, patients are sedated.  
33  
34  
35  
36  
37  
38  
39  
40  
41  
42  
43  
44  
45  
46  
47  
48  
49  
50  
51  
52  
53  
54  
55  
56  
57  
58  
59  
60

1  
2  
3 **Scene 3.** Explanation concerning the drips, infusions and gastric tube.  
4

5 *Setting: The explanation window disappears, and the ICU physician appears.*  
6

7 **ICU physician:** The different devices, the mechanical ventilator and the alarm signals have just  
8 been explained to you. Now, you will receive an explanation concerning the  
9 drips, infusions and gastric tube.  
10

11 *Setting: The ICU physician disappears.*  
12

13  
14 **Voice-over:** IV drips and lines are necessary not only to administer medication and fluids  
15 but also to continuously monitor the blood pressure.  
16

17 *Setting: The explanation window appears, and the function of a peripheral drip is explained using an*  
18 *animation.*  
19

20 **Voice-over:** This is an 'ordinary' IV drip, also called a peripheral IV drip. This is usually  
21 inserted into a vessel in the forearm, but sometimes, it is placed in the foot.  
22 The nurse can administer medication or fluid through this drip. Because these  
23 peripheral vessels are thin, not every medication can be administered through  
24 the veins.  
25

26  
27 *Setting: Explanation of a central line is explained using an animation.*  
28

29  
30 **Voice-over:** Here, you see a central line. This is a thick IV drip that is inserted into a large  
31 blood vessel, often in the neck or groin. The insertion of such a line will be  
32 performed in a sterile manner; therefore, a blue cloth is stretched over your  
33 relative's head. Working in a sterile field minimises the risk of infection. The  
34 main reason to insert a central line is to administer medications that cannot be  
35 administered through ordinary IV drips. Nutrition can also be directly  
36 administered to the blood stream through a central line.  
37

38 *Setting: Explanation of an arterial line is explained using an animation.*  
39

40  
41 **Voice-over:** This is an arterial line. This is an IV drip that is placed directly into an artery,  
42 so blood pressure can continuously be monitored. It is also used to take blood  
43 samples. Without such a line, blood samples may have to be taken too often.  
44

45 *Setting: Explanation about a gastric tube is given using an animation.*  
46

47  
48 **Voice-over:** A gastric tube is a tube that is placed through the nose or mouth through the  
49 oesophagus into the stomach. The tube is usually to administer tube feedings.  
50 It can also be used to administer medications.  
51  
52  
53  
54  
55  
56  
57  
58  
59  
60

1  
2  
3 *Setting: The tracheotomy procedure is explained using an animation.*  
4  
5

6 **Voice-over:**

7 When patients are mechanically ventilated for a prolonged period of time, they  
8 sometimes receive a tracheotomy. During a tracheotomy procedure, a tube,  
9 also known as a cannula, is placed in the trachea through the neck. This  
10 cannula replaces the ventilation tube, which is inserted through the mouth.  
11 There are several reasons to perform a tracheotomy, but the most important  
12 one is long-term mechanical ventilation. The patient must be slowly and  
13 gradually weaned off mechanical ventilation. Tracheotomy placement is often  
14 conducted in the ICU. The cannula is inserted just above the sternum through  
15 an incision in the trachea. The end of the tube can be inflated to prevent air  
16 leakage. Because the air flows through the cannula to the lungs and no air  
17 passes the vocal cords, patients initially cannot speak when they have a  
18 tracheotomy. However, the tracheal cannula can be closed using a speaking  
19 valve, whereby the end of the cannula is deflated; as a result, air will flow  
20 through the vocal cords making it possible to speak. The tracheostomy will be  
21 removed when a patient has sufficient strength to breath on their own and can  
22 cough up sputum properly.  
23  
24  
25  
26  
27  
28  
29  
30  
31  
32  
33  
34  
35  
36  
37  
38  
39  
40  
41  
42  
43  
44  
45  
46  
47  
48  
49  
50  
51  
52  
53  
54  
55  
56  
57  
58  
59  
60

1  
2  
3 **Scene 4.** Explanation about the treatment team and their responsibilities.

4 *Setting: The explanation window disappears, and an ICU physician, nurse and resident enter the room.*

5  
6 **Voice-over:** In the ICU, your relative is treated 24 hours per day by a treatment team.  
7 Therefore, there are many people working in the ICU. The medical treatment  
8 team that is primarily responsible for your relative's treatment includes the ICU  
9 physician, the ICU resident and the ICU nurse.

10  
11 **ICU physician:** My fellow ICU physicians and I, the intensivists, are specialised in the  
12 treatment of critically ill patients. Every morning, afternoon and evening, there  
13 is a meeting with the treatment team taking care of your relative to discuss how  
14 you are doing. This will take place in your relative's room.

15  
16 **ICU resident:** Hello, my name is '**name resident**', I am a resident in the ICU. This means I  
17 am being trained to become an ICU physician. Together with my fellow  
18 residents, I am responsible for the daily medical care for your relative. Hereby,  
19 we are always supported by the ICU physicians.

20  
21 **ICU nurse:** My fellow ICU nurses and I will look after your relative, monitor your relative  
22 continuously and are trained to operate the devices for your treatment. Your  
23 relative will be taken care of by the same nurse every shift.

24  
25 *Setting: The treatment team leaves the room.*

1  
2  
3 **Scene 5. Outro**  
4

5 *Setting: The explanation window disappears and the ICU physician and nurse re-enter the room.*  
6  
7

8 **ICU physician:** We hope you now have a better understanding of the treatment your relative  
9 received in the ICU. This is the end of this video, you can remove the VR  
10 glasses.  
11  
12  
13  
14  
15  
16  
17  
18  
19  
20  
21  
22  
23  
24  
25  
26  
27  
28  
29  
30  
31  
32  
33  
34  
35  
36  
37  
38  
39  
40  
41  
42  
43  
44  
45  
46  
47  
48  
49  
50  
51  
52  
53  
54  
55  
56  
57  
58  
59  
60

For peer review only



1  
2  
3  
4  
5  
6  
7  
8  
9  
10  
11  
12  
13  
14  
15  
16  
17  
18  
19  
20  
21  
22  
23  
24  
25  
26  
27  
28  
29  
30  
31  
32  
33  
34  
35  
36  
37  
38  
39  
40  
41  
42  
43  
44  
45  
46  
47  
48  
49  
50  
51  
52  
53  
54  
55  
56  
57  
58  
59  
60

**Supplementary Data 2.** Translation of the information for participants and informed consent form.

peer review only

Participant information  
Virtual Reality for family members of patients in the ICU

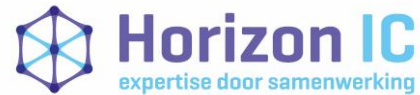

## Participant information about participation in medical research.

### Virtual Reality for family members / relatives of patients admitted to the ICU.

*Official title: Intensive Care Unit specific Virtual Reality for family members (ICU-VR-F) of patients in the ICU.*

#### Introduction

Dear sir, madam,

Using this letter, we would like to inquire whether you are interested in participation in medical research. Participation is on a voluntary basis. You have received this letter because your family member or relative has been admitted to the Intensive Care Unit (ICU) of the Erasmus MC, Franciscus Gasthuis & Vlietland, Ikazia hospital or Maasstad hospital.

In this letter, we will inform you about the nature of the study, what participation means, and what the benefits and disadvantages are of participation. Would you like to carefully read the entire letter prior to deciding whether you want to participate? If you are willing to participate, you can fill in and sign the informed consent form, which can be found on the last page of this letter.

#### Ask questions

You can use the information provided in this letter to make your decision. Besides, we would like to encourage you to:

- Ask questions to the investigator who has provided you with this information.
- Talk about participation in this study with your partner, family, or friends.
- Ask questions to the independent expert, [REDACTED]
- Read the information provided on [www.rijksoverheid.nl/mensenonderzoek](http://www.rijksoverheid.nl/mensenonderzoek).

### 1. General information

This study was initiated by the Erasmus MC. We will refer to the Erasmus MC as the sponsor. Investigators, which can be personified by doctors, nurses and student-researchers, conduct the study in several hospitals, namely the Erasmus MC, the Franciscus Gasthuis & Vlietland, the Ikazia hospital, and the Maasstad hospital, all in Rotterdam.

For this research, we have a required sample size of 160 participants. The medical ethics committee of the Erasmus MC has approved this study.

### 2. Objectives of the study.

In the current study, we want to study whether information provision using an Intensive Care Unit-specific Virtual Reality intervention for Family Members, ICU-VR-F, can effectively mitigate psychological impairments after ICU treatment of a loved one. Additionally, we will study whether ICU-VR-F helps family members/relatives understand the environment and treatment in the ICU, and whether ICU-VR-F can attribute to the quality of life of relatives of former ICU patients.

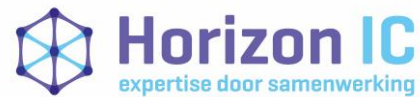

## Participant information

Virtual Reality for family members of patients in the ICU

To study this, we will compare family members/relatives who do not receive ICU-VR-F, the control group, with family members/relatives who do receive ICU-VR-F, the intervention group.

ICU-VR-F is an information film about the Intensive Care Unit which can be watched using virtual reality. Virtual reality, or VR, represents a virtual or apparent reality. ICU-VR-F lasts approximately 14 minutes. During ICU-VR-F, you are given explanation about several facets of the ICU environment and treatment. During this explanation, you will be laid down in an ICU bed. You can always interrupt ICU-VR-F. In the latter case, you may decide to continue watching ICU-VR-F later on, or to not continue watching ICU-VR-F.

### 3. Background of the study

An Intensive Care Unit treatment of a family member or relative in the ICU can be a stressful experience. It has been demonstrated that a considerable part of the family members/relatives of ICU patients develop psychological impairments in the period after the patient's ICU treatment. These impairments can comprise symptoms of a post-traumatic stress disorder (PTSD), anxiety disorder, or a depression. Additionally, family members/relative can experience a complicated grief in the unfortunate event of a patient deceasing in the ICU. It is known that proper information provision can help reducing or preventing the development of such complaints.

### 4. Progress of the study

*How long will participation last?*

Are you participating in this study? Participation will last until six months after your family member's/relative's discharge from the ICU.

*Step 1: Are you suitable for participation?*

We will first examine whether you are suitable for participation. All family members/relatives of patient admitted to ICU, of whom the doctors expect that they will be treated there for at least 72 hours, are eligible for participation. Because the explanation in ICU-VR-F is given in Dutch, and because the questionnaires for this study are written in Dutch, it is important that you have sufficient understanding of the Dutch language. You will also need to be in possession of a smartphone, tablet, or laptop which is compatible to use the VR function in YouTube, as you are given the opportunity to watch the intervention at home as well.

In the unfortunate event of your family member/relative deceasing in the ICU, we will ask you to reconsider participation. We will, of course, understand if you no longer wish to participate.

Participant information  
Virtual Reality for family members of patients in the ICU



### Step 2: Informed Consent

Within two days after your family member's/relative's ICU admission, the investigator has given information about the study, either by telephone or in person, and has sent you this letter. We ask you to carefully and thoroughly read this letter, and consider participation.

If you decide to participate in this study, you can sign the informed consent form which can be found on the last page of this letter. By signing the informed consent form, you confirm that you have been given enough information about the study, that you have been given the opportunity to ask questions, and, based on this information, wish to participate in the study.

### Step 3: Randomization

Participants in this study will be randomly assigned to **two groups**. This randomization, comparable with a lottery, decides to which group you are assigned. The investigator or doctor **does not have any influence** on the outcome of the randomization.

The two groups are as following:

- 1) The control group. Participants assigned to this group will not receive ICU-VR during the study period.
- 2) The intervention group. Participants assigned to this group will receive ICU-VR-F once in the hospital and will be provided with an access link and cardboard VR glasses, making them able to watch ICU-VR-F at home as many times as wanted. If you are not allowed to visit the hospital due to COVID-19 regulations, you will only receive an access link and the cardboard VR glasses to watch ICU-VR-F at home.

Randomization will be conducted immediately after your decision to participate in the study.

#### Step 4a. Participants in the control group

Participants, who are assigned to the control group, will receive 'care as usual'. This means that nothing will change with regard to how family members/relatives are normally treated in the ICU.

We will however ask you to fill out several questionnaires. You will receive the first one at the time you decide to participate in the study. With this first questionnaire, we aim to determine your psychological state and quality of life prior to the hospitalization of your family member/relative and how you have experienced the ICU admission of your family member/relative. Completing this questionnaire will take approximately **30 minutes**.

#### Step 4b. Participants in the intervention group

Participants, who are assigned to the intervention group, will receive ICU-VR-F once within the hospital, if they are allowed to visit the hospital with regard to COVID-19 regulations. This will take place as soon as possible after you have decided to participate. To offer ICU-VR-F, we will use our virtual reality glasses. In **Figure 1** you will find a picture of the VR glasses on the left, and a person using the VR glasses on the right. Before you will receive ICU-VR-F, you will be explained how to use the VR glasses, and how to behave in the virtual environment. After you have received ICU-VR-F once with our VR glasses, you

## Participant information

Virtual Reality for family members of patients in the ICU

will receive an access link and cardboard VR glasses. Using these, you can use ICU-VR-F again at home, as many time as wanted. You are also free to offer ICU-VR-F to friends or family. Family members/relatives, who are due to COVID-19 regulations not allowed to visit the hospital, will only receive the access link and cardboard VR glasses to watch ICU-VR-F at home.

Also, you will be asked to fill out several questionnaires. You will receive the first one at the time you decide to participate in the study. With this first questionnaire, we aim to determine your psychological state and quality of life prior to the hospitalization of your family member/relative and how you have experienced the ICU admission of your family member/relative. Completing this questionnaire will take approximately **30 minutes**.

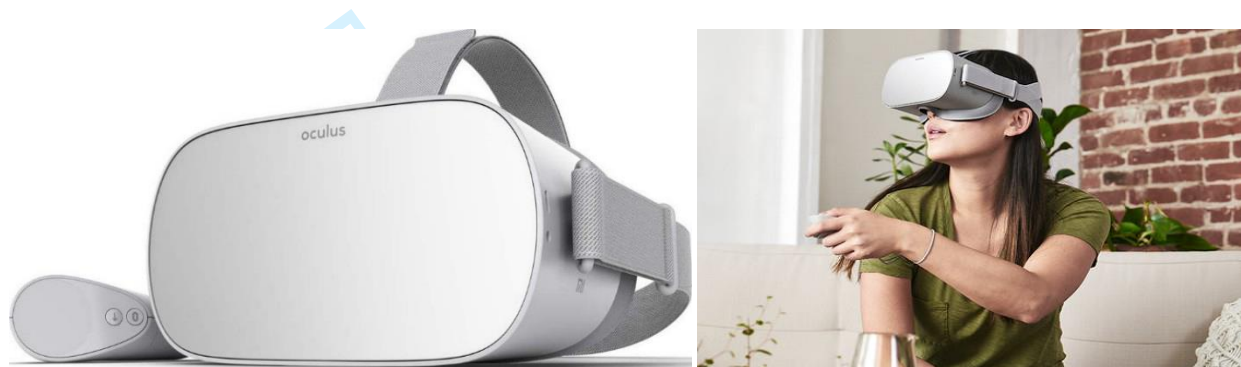

**Figure 1.** Picture of the VR glasses and its controller which will be used when offering ICU-VR-F in the hospital (left). On the right, you see a person using the VR glasses. VR glasses use light that is safe for your eyes. You can keep your own glasses on when using these VR glasses.

*Step 5. After your family member's/relative's discharge from the ICU.*

After your family member/relative has been discharge from the ICU, we will sent the second questionnaire. Follow-up questionnaire will thereafter be sent after 1 month, 3 months and 6 months. Using these questionnaires, we will measure you psychological state and quality of life. Completing these questionnaires will take approximately **30 minutes** per time.

After you have completed the last questionnaire, which will be sent six months after your family member's/relative's ICU discharge, you will be finished with the study.

## 5. Which commitments do you make when participating?

We would like this study to be conducted as intended. Therefore, we ask you to honour the following commitments:

- You watch ICU-VR-F for the first time in the hospital in the way the investigator has explained, if you are allowed to visit the hospital.
- If you are not allowed to visit the hospital, you will watch ICU-VR-F at least once at home using the access link and cardboard VR glasses.
- You cannot participate in another medical study, unless the investigator has granted you permission. Permission can only be given if the other study will not confound the outcomes of this study.

## Participant information

Virtual Reality for family members of patients in the ICU

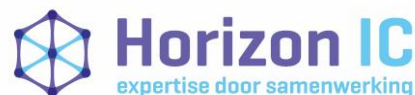

- You complete the questionnaire at the described time-points. If you are unable to fill out the questionnaire by yourself, you may ask a family member or friend to help. If there are no family members or friends available, you may ask the investigator to complete the questionnaire by telephone.
- You contact the investigator in the following situations:
  - You no longer wish to participate in the study
  - Your phone number, home address, or e-mail address changes

## 6. Safety considerations

In previous studies, we have demonstrated the use of an Intensive Care Unit-specific Virtual Reality intervention is safe in healthy volunteers and in patients. Virtual reality can however cause short-term complaints, such as nausea, dizziness, or a spinning feeling during its use. These complaints are commonly mild or nature, lasts for several minutes, and will resolve spontaneously. If the complaints do not resolve, you can contact the investigator. You will find his phone number on page 9 of this letter.

## 7. Benefits and disadvantages of participation

Participation in this study can have benefits and disadvantages. We will describe these here. Consider these when considering participation, and talk about them with others.

A possible benefit of participation in this study is that receiving ICU-VR-F may improve understanding of the ICU and thereby reduce psychological complaints and improve quality of life after your relative's/family member's ICU treatment. This is however **not certain and will be studied in this study**.

The most important disadvantage of participation in this study, it that completing the questionnaire will take a considerable amount of time. Also, you have to honour the commitments as described in paragraph 5, and you may experience short-lasting complaints during ICU-VR-F, as described in paragraph 6.

*If you don't want to participate?*

You are the one to decide whether or not you want to participate. Do you not want to participate? This is no problem, and nothing will change with regard to how you or your family member/relative is treated in the ICU.

Participant information  
Virtual Reality for family members of patients in the ICU

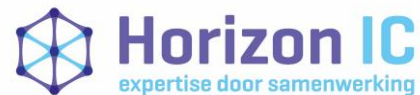

## 8. End of the study.

The investigator will inform you when there is new information about the study, which is important for you as participant. The investigator will then ask you if you want to continue your participation.

In the following situations, the study will end for you:

- If you have completed the last questionnaire, which is sent to you six months after your family member's/relative's discharge from the ICU.
- If you decide that you no longer wishes to participate. You can always terminate your participation. We ask you to immediately inform the investigator if you wish to no longer participate. You don't have to give a reason why you wish to no longer participate. Discontinuation of your participation will never have consequences for you or your family member/relative.
- If one of the following organization decide that the study should be terminated:
  - The Erasmus MC (sponsor)
  - The governance
  - The medical ethics committee which approved the study.

*What happens if you decide that you no longer wishes to participate*

The investigators may use your data which is collected until the moment you decide to discontinue your participation. If you want, data that is collected from you can be deleted. You can request this by the investigator.

The entire study will be ended if all participants have completed their last questionnaire.

## 9. After the study.

Approximately 6 months after you have completed your last questionnaire, the investigator will inform you about the most important findings of the study.

## 10. Usage of your data

If you participate in this study, you also consent to collect, use, and store your data.

*Which data do we store?*

We will store the following data:

- Your name
- Your gender
- Your (e-mail) address
- Your date of birth
- Data regarding your psychological well-being, extracted from the questionnaires
- Data which is collected during the study
- Treatment-related characteristics of your family member/relative.



Participant information  
Virtual Reality for family members of patients in the ICU



*Why do we collect, use, and store your data?*

We collect, store, and use your data to answer the research questions of this study and to be able to publish the results.

*How do we protect your privacy?*

To protect your privacy, a code will be assigned to all your data. This code will be the only identifier for your data. The key, which makes it possible to link the code with you, will be stored in a safe place in the Intensive Care Unit where your family member/relative is treated. When we process your data, we will only use this code. In reports or publications about the study, we will ensure no participants can be identified based on the data provided.

*Who have access to your data?*

There are persons who can be given permission to access the data without codes. These are persons who monitor whether the study is conducted properly and reliably, and according to all regulations.

Persons who will be given permission are:

- A monitor who is an employee of the Erasmus MC
- National supervisory authorities.

These persons will treat your data confidentially. By consenting to participate in this study, you also give permission that your data can be monitored by these.

*For how long will we store your data?*

We will store your data for 15 years in the hospital.

*Can you withdraw your consent for the use of your data?*

You can always withdraw your consent for the use of your data. However, if you withdraw your consent, and the investigators have already collected data for the study, the investigator is allowed to use the data collected until the consent was withdrawn.

*Would you like to know more about your privacy?*

- Do you want to know more about your rights with regard to the use of your data? You can take a look at [www.autoriteitpersoonsgegevens.nl](http://www.autoriteitpersoonsgegevens.nl).
- Do you have any questions about your rights? Or do you have complaints about the use of your data? You may contact the person who is responsible for the collection of your data. For this study, this will be the principal investigator, of whom the contact details can be found on page 9 of this letter.
- If you have complaints about the use of your data, we would recommend to first discuss these with the investigators of the study. You can also contact the Data Protection Officer of the hospital where your relative was treated. Their contact details are stated below. You can also file a complaint by the Authority of Personal Data.



Participant information  
Virtual Reality for family members of patients in the ICU



**Erasmus MC:**

E-mail: [REDACTED]

Phone number: [REDACTED]

**Franciscus Gasthuis & Vlietland**

E-mail: [REDACTED]

Phone number: [REDACTED]

**Ikazia hospital:**

E-mail: [REDACTED]

Phone number: [REDACTED]

**Maasstad hospital:**

Legal Affairs Department / Data Protection Officer

Postal address: [REDACTED]

Phone number: [REDACTED]

*Where to find more information about this study?*

You may find more information about this study on [www.TrialRegister.nl](http://www.TrialRegister.nl). When the study has ended, you may find a summary of the results of the study on this site. You can find the study by searching for 'ICU-VR for Family members' (number: NL73670.078.20).

## 11. Financial compensation for participation in this study.

Participation in this study is free of charge. You will neither receive any compensation for participation in this study, also no travel or expense reimbursement.

## 12. Insurance.

The Erasmus MC has taken out an insurance for all participants in this study. The insurance will pay for damage due to participation in the study. This comprises damage during the study, or within 4 years after participation in the study. If you need a reimbursement, you should report damage within 4 years at the insurance company.

Have you suffered damage due to your participation in the study? You should report this to the insurer:

The contact details of the study's insurer are:

Name: [REDACTED]

Address: [REDACTED]

Phone number: [REDACTED]

E-mail: [REDACTED]

Participant information  
Virtual Reality for family members of patients in the ICU



The insurance will cover a maximum of € 650.000 per participant, a maximum of € 5.000.000 for the entire study and € 7.500.000 per year for all studies initiated by the Erasmus MC.

Pay attention: the insurance will not cover the following damage:

- Damage due to a risk about which we informed you in this letter. However, if the damage turns out to be higher than we anticipated, or if the risk was very low, the insurance will cover this damage.
- Damage to your health which would have also developed if you hadn't participated in the study.
- Damage which is a direct consequence of not following given instructions or recommendations of the study team.
- Damage to the health of your children or grandchildren.
- Damage due to a treatment strategy which is already evidence based, or due to a study investigated an evidence-based treatment strategy.

These provisions are set out in the 'Compulsory insurance for medical research involving humans 2015 Decree'. This decision can be found in the Laws of the Government (<https://wetten.overheid.nl>).

### 13. Informing the general practitioner

As participation to this study is not expected to have any negative consequences for your health, or the health of your family members/relatives, we will **not** inform you general practitioner about your participation in this study. You are however free to tell your general practitioner yourself, and he/she can contact the study team for questions.

### 14. Do you have questions?

Questions about the study can be asked to the study team. The contact details of the study team are stated below. Would you like to be advised by someone who is not involved in the study team? You can then contact dr. [REDACTED] (e-mail: [REDACTED], phone number: [REDACTED]). He is an independent expert of the study, and has thereby the knowledge to answer your questions and give you advice, but is not involved in the study.

If you have complaints about the study, we would recommend to first discuss these with the investigators of the study or the doctor who is treating your relative. Do you prefer to talk to somebody else? You may contact the complaints officer or complaints committee of your hospital, or the Authority of Personal Data.

Participant information  
Virtual Reality for family members of patients in the ICU



The treatment team involves:

- [REDACTED], executive investigator, primary contact for this study
  - E-mail: [REDACTED]
  - Phone number: [REDACTED]
- [REDACTED], coordinating investigator
  - E-mail: [REDACTED]
  - Phone number: [REDACTED]
- [REDACTED], principle investigator Erasmus MC
  - E-mail: [REDACTED]
  - Phone number: [REDACTED]
  - Intensive Care Unit: [REDACTED]
  - Hospital: [REDACTED]
- [REDACTED], principle investigator Franciscus Gasthuis & Vlietland
  - E-mail: [REDACTED]
  - Phone number: [REDACTED]
  - Intensive Care Unit: [REDACTED]
  - Hospital: [REDACTED]
- [REDACTED], principle investigator Ikazia hospital
  - E-mail: [REDACTED]
  - Phone number: [REDACTED]
  - Intensive Care Unit: [REDACTED]
  - Hospital: [REDACTED]
- [REDACTED], principle investigator Maasstad hospital
  - E-mail: [REDACTED]
  - Phone number: [REDACTED]
  - Intensive Care Unit: [REDACTED]
  - Hospital: [REDACTED]

## 15. Consent for this study.

You should first think about participating in this study. Therefore, you should tell the investigator whether you have understood the provided information and whether or not you would like to participate. If you want to participate, you will be asked to fill out and sign the informed consent form on the last page of this letter. Both you as the investigator will receive a copy of the signed version of the informed consent form.

Thank you for your time.

Participant information  
Virtual Reality for family members of patients in the ICU

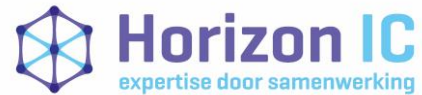

**Informed consent form for participants**

Related to: *'Virtual Reality for family members/relatives of patients in the Intensive Care Unit.'*

- I have read the information letter. I have been given the opportunity to ask additional questions, and my questions are answered sufficiently. I have had enough time to consider participation.
- I know that participation is on a voluntary basis. I also know that I can always decide to not participate or to stop participation. I do not have to give any reason if I decide not to participate or to stop participation..
- I give consent to the investigators to collect and use my data. The investigators will only collect and use data to answer the research question of the study.
- I am aware that there are persons who can be granted permission to access my data to monitor the study. I give consent to these persons to access my data.
- I do  / do not  (**please indicate your choice**) give permission to contact me after this study to ask if I am interested to participate in another, related study.
- I want to participate in the study.

My name is (participant): .....

Signature: .....

Date: \_\_ / \_\_ / \_\_

I declare that I have fully informed this participant about the current study.

If new insights will be obtained about the study, which could influence the participant's decision to participate in the current study, I will timely inform the participant.

Name investigator (or its representative):.....

Signature:.....

Date: \_\_ / \_\_ / \_\_

*The participant will receive a complete copy of the information letter, including a (copy of the) signed version of the informed consent form.*

1  
2  
3  
4  
5  
6  
7  
8  
9  
10  
11  
12  
13  
14  
15  
16  
17  
18  
19  
20  
21  
22  
23  
24  
25  
26  
27  
28  
29  
30  
31  
32  
33  
34  
35  
36  
37  
38  
39  
40  
41  
42  
43  
44  
45  
46  
47  
48  
49  
50  
51  
52  
53  
54  
55  
56  
57  
58  
59  
60

**Supplementary data 3.** Translation of the self-composed questionnaires.

For peer review only

### Questionnaire about your experiences in the Intensive Care Unit.

We would like to know how you have experienced the information provision regarding the ICU admission or your relative.

Therefore, we would like to ask you to answer the following questions as honest as possible.

Are you unsure which of the answers to choose? Choose the answer that applies most to your situation.

- 1) Prior to your relative's current ICU admission, do you have other experiences with an ICU admission?

*Multiple answers can be given.*

Yes, I have previously been admitted to an ICU myself.

Yes, my relative has also been treated in an ICU previously.

Yes, one of my other relatives have been treated in an ICU previously.

No, I have no other experiences with an ICU admission.

- 2) Was the ICU admission of your relatives unexpected for you?

Yes

No

- 3) What is the current situation of your relative?

My relative is still hospitalized or in another care institution

My relative is at home

My relative has passed away

Other, namely: \_\_\_\_\_

The following questions are about your experiences with the care and support of relatives in the Intensive Care Unit. When the term "care providers" is used in a question, this refers to all care providers who work in the Intensive Care Unit. Some questions relate to one specific care provider, for example the nurse. In that case, this is mentioned in the question.

#### ***Reception and guidance***

The following questions are about your first visit to your relative in the Intensive Care Unit.

- 4) During your first visit to your relative in the Intensive Care Unit, has there been given attention to you as being a relative?

No, not at all

A little

Quite much

Yes, very much

- 5) During your first visit to your relative in the Intensive Care Unit, did you receive information about your relative's condition?

No, not at all

A little

Quite much

Yes, very much

- 6) Did you receive timely information about your relative's condition during your first visit?

No

Yes

- 1  
2  
3 7) Were you prepared for your first confrontation with your relative in the Intensive Care Unit?  
4  No, not at all  
5  A little  
6  Quite much  
7  Yes, very much  
8  
9  
10 8) Have you received general information about the ICU department (about telephone numbers,  
11 visiting hours and work flow in the ICU)?  
12  No  
13  Yes  
14  
15 9) Did you receive information about how you could contribute to the care, comfort and well-being  
16 of your relative?  
17  No  
18  Yes  
19  
20 10) Were you given the opportunity to contribute to the care, comfort and well-being of your  
21 relative?  
22  No  
23  Yes  
24  
25 11) Were you kept informed of your relative's condition?  
26  No  
27  Yes  
28  
29 12) Did you feel heard in decision-making about your relative's medical treatment?  
30  Never  
31  Sometimes  
32  Usually  
33  Always  
34  
35 13) Has there been given attention to your needs?  
36  No  
37  Yes  
38  
39  
40  
41

42 ***Explanation in the Intensive Care Unit***

43 The following questions are about the information you received in the Intensive Care Unit.

- 44  
45 14) Have you received explanation about the treatment of your relative in the Intensive Care Unit?  
46  No, not at all  
47  A little  
48  Quite much  
49  Yes, totally  
50  
51 15) Have you received explanation about the different devices in the Intensive Care Unit?  
52  No, not at all  
53  A little  
54  Quite much  
55  Yes, very much  
56  
57  
58  
59  
60

1  
2  
3 16) Did you receive explanation about the different alarm sounds in the Intensive Care Unit?

4  No, not at all

5  A little

6  Quite much

7  Yes, very much

8  
9  
10 17) Have you received explanation about mechanical ventilation of your relative?

11  No, not at all

12  A little

13  Quite much

14  Yes, very much

15  
16 18) Have you been given explanation about the different IV drips and lines used for your relative and  
17 their usefulness?

18  No, not at all

19  A little

20  Quite much

21  Yes, very much

22  
23 19) Were you given explanation of the treatment team that cared for your relative, and their  
24 corresponding duties?

25  No, not at all

26  A little

27  Quite much

28  Yes, very much

29  
30 20) Have you received explanation of the different transition times/consultation times of the care  
31 providers?

32  No, not at all

33  A little

34  Quite much

35  Yes, very much

36  
37 21) In general, was the information you received relevant/useful?

38  No, not at all

39  A little

40  Quite much

41  Yes, very much

42  
43 22) Are you, in general, satisfied with the completeness of the information you have received?

44  No, not at all

45  A little

46  Quite much

47  Yes, very much

48  
49 23) Was the information and explanation you received in general understandable for you?

50  No, not at all

51  A little

52  Quite much

53  Yes, very much

54  
55  
56  
57  
58  
59  
60



**Additional help**

You may have been offered additional help for you as a relative. This concerns practical or emotional support from social workers, spiritual counsellors and/or psychologists. The following questions will ask you about this help.

24) Was there attention to your needs as a relative?

- No, not at all
- A little
- Quite much
- Yes, very much

25) Have you been informed about keeping a diary during the ICU period?

- Yes
- No

If yes; did you keep a diary about your relative's Intensive Care period?

- Yes
- No

26) Have you been informed about social work, spiritual care or psychological help for yourself?

*Multiple answers can be given.*

- No
- Yes, about social work
- Yes, about spiritual care
- Yes, about psychological help

27) Have you been in contact with the social worker, chaplain or psychologist in the hospital?

*Multiple answers can be given.*

- Yes, with the social worker
- Yes, with the spiritual caretaker
- Oh yes, with the psychologist
- No

If yes; was the social worker, spiritual counsellor or psychologist easily accessible for you?

- Yes
- No

If yes; did you experience the contact with the social worker, spiritual counsellor or psychologist as supportive?

- Yes
- No

28) Were you informed about the possibility to talk to a care provider about your experiences, after your relative's discharge from the ICU or the death of your relative in the ICU?

- Yes
- No

29) Did the visiting hours match your needs?

- No, not at all
- A little
- Quite much
- Yes, very much

**Contact with healthcare staff**

30) Were you kept informed of your relative's situation by the same doctor during your relative's Intensive Care Unit admission?

No, often by different doctors

Yes, mostly by the same doctors, but also by other doctors.

Yes, almost always by the same doctor, but sometimes by a different doctor.

Yes, always by the same doctor.

31) Were you kept informed of your relative's situation by the same nurses during your relative's Intensive Care Unit admission?

No, often by different nurses

Yes, mostly by the same nurse, but also by other nurses.

Yes, almost always by the same nurse, but sometimes by a nurse.

Yes, always by the same nurse.

32) How often have you had contact by telephone with a doctor about your nurse's condition?  
\_\_\_\_ times a week

33) How often have you had contact by telephone with a doctor about your nurse's condition?  
\_\_\_\_ times a week

34) How often did you have contact in person with a doctor about your relative in person?  
\_\_\_\_ times a week

35) How often did you have contact in person with a nurse about your relative?  
\_\_\_\_ times a week

**General judgment**

We would like to ask you to indicate below what rating you would give various aspects of Intensive Care Unit. 0 means that you were very unsatisfied, 10 means that it couldn't be better.

36) What number from 0 to 10 (where 0 is very bad and 10 is very good) do you give for the information you received in the Intensive Care Unit?

|                       |                       |                       |                       |                       |                       |                       |                       |                       |                       |                       |
|-----------------------|-----------------------|-----------------------|-----------------------|-----------------------|-----------------------|-----------------------|-----------------------|-----------------------|-----------------------|-----------------------|
| 0                     | 1                     | 2                     | 3                     | 4                     | 5                     | 6                     | 7                     | 8                     | 9                     | 10                    |
| <input type="radio"/> |

37) Which number from 0 to 10 (where 0 is very bad and 10 is very good) do you give for the explanation about the treatment and the environment of the Intensive Care Unit?

|                       |                       |                       |                       |                       |                       |                       |                       |                       |                       |                       |
|-----------------------|-----------------------|-----------------------|-----------------------|-----------------------|-----------------------|-----------------------|-----------------------|-----------------------|-----------------------|-----------------------|
| 0                     | 1                     | 2                     | 3                     | 4                     | 5                     | 6                     | 7                     | 8                     | 9                     | 10                    |
| <input type="radio"/> |

38) What number from 0 to 10 (where 0 is very bad and 10 is very good) do you give the doctors in the ICU for their way of communicating?

|                       |                       |                       |                       |                       |                       |                       |                       |                       |                       |                       |
|-----------------------|-----------------------|-----------------------|-----------------------|-----------------------|-----------------------|-----------------------|-----------------------|-----------------------|-----------------------|-----------------------|
| 0                     | 1                     | 2                     | 3                     | 4                     | 5                     | 6                     | 7                     | 8                     | 9                     | 10                    |
| <input type="radio"/> |

39) On a scale from 0 to 10 (where 0 is very bad and 10 is very good), what number do you give the nurses in the ICU for their way of communicating?

|                       |                       |                       |                       |                       |                       |                       |                       |                       |                       |                       |
|-----------------------|-----------------------|-----------------------|-----------------------|-----------------------|-----------------------|-----------------------|-----------------------|-----------------------|-----------------------|-----------------------|
| 0                     | 1                     | 2                     | 3                     | 4                     | 5                     | 6                     | 7                     | 8                     | 9                     | 10                    |
| <input type="radio"/> |

40) What number from 0 to 10 (where 0 is very bad and 10 is very good) do you give the care and guidance of relatives in the ICU?

|                       |                       |                       |                       |                       |                       |                       |                       |                       |                       |                       |
|-----------------------|-----------------------|-----------------------|-----------------------|-----------------------|-----------------------|-----------------------|-----------------------|-----------------------|-----------------------|-----------------------|
| 0                     | 1                     | 2                     | 3                     | 4                     | 5                     | 6                     | 7                     | 8                     | 9                     | 10                    |
| <input type="radio"/> |

**Questions about your perspectives on the ICU-VR-F intervention.**

We are interested in how you experienced receiving information about the Intensive Care Unit admission and the Intensive Care Unit environment through Virtual Reality. That is why we would like to ask you to answer the questions below as honestly as possible.

1) I liked to receive explanation about the Intensive Care Unit treatment of my relative in this way

- Not at all
- Almost not
- Neutral
- A little
- Very much

2) Virtual Reality is a nice way to obtain information for me.

- Not at all
- Almost not
- Neutral
- A little
- Very much

3) For me, Virtual Reality is a better way of obtaining information than an information folder.

- Not at all
- Almost not
- Neutral
- A little
- Very much

4) For me, Virtual Reality is a better way of obtaining information than a 'normal' video

- Not at all
- Almost not
- Neutral
- A little
- Very much

5) The Virtual Reality information film has ensured that I understand the treatment of my relative in the Intensive Care Unit.

- Not at all
- Almost not
- Neutral
- A little
- Very much

1  
2  
3 6) The Virtual Reality information film has helped me with processing the Intensive Care Unit  
4 admission of my relative.  
5

6  Not at all

7  Almost not

8  Neutral

9  A little

10  Very much

11  
12  
13  
14 7) The Virtual Reality information film allows me to empathize with my relative's experience when  
15 he/she was in the Intensive Care Unit.  
16

17  Not at all

18  Almost not

19  Neutral

20  A little

21  Very much

22  
23  
24 8) I recommend this Virtual Reality information film for other relatives of Intensive Care Unit  
25 patients  
26

27  Not at all

28  Almost not

29  Neutral

30  A little

31  Very much

32  
33  
34  
35 9) Do you think there was information missing in the Virtual Reality information film that you would  
36 have liked to have explained?  
37

38  Yes

39  No

40  
41  
42 If yes, what information did you miss?  
43

44  
45 \_\_\_\_\_  
46  
47 \_\_\_\_\_  
48  
49 \_\_\_\_\_  
50

51 10) Have you shown the Virtual Reality information film to others to explain to them about the  
52 Intensive Care Unit?  
53

54  Oh yes, to my family

55  Oh yes, to my friends

56  Oh yes, to both my family and my friends

57  Yes, to others, namely: \_\_\_\_\_

58  No  
59  
60

1  
2  
3 11) How often have you watched the Virtual Reality information film at home?  
4

5  Not at all, only once in the hospital

6  1-3 times

7  4-6 times

8  7-10 times

9  More than 10 times  
10  
11

12 12) How did you watch the information film at home?  
13

14  Only through Virtual Reality, with the cardboard VR glasses

15  Only in 2D, without the cardboard VR glasses

16  Usually through Virtual Reality, with the cardboard VR glasses, but also in 2D, without the  
17 cardboard VR glasses

18  Usually in 2D, without the cardboard VR glasses, but also through Virtual Reality, with the  
19 cardboard VR glasses.

20  Just as often by means of Virtual Reality, with the cardboard VR glasses, as in 2D, without the  
21 cardboard VR glasses.  
22  
23  
24  
25  
26  
27  
28  
29  
30  
31  
32  
33  
34  
35  
36  
37  
38  
39  
40  
41  
42  
43  
44  
45  
46  
47  
48  
49  
50  
51  
52  
53  
54  
55  
56  
57  
58  
59  
60

**Questions about perceived stress factors during your relative's Intensive Care Unit treatment.**

With the questions below we want to investigate which factors caused you concerns during the Intensive Care Unit admission of your relative. The first question asks how many hours per week you spent on the ICU admission of your relative. In the questions that follow, we want to know how much you were concerned about the topics mentioned during the ICU admission of your relative.

- 1) How much time per week did you spend in total on the Intensive Care Unit treatment of your relative, which you would not otherwise have spent on your relative?

*Think of travel time to the hospital, visiting times, tasks in the household that you normally did not do*

Approximately \_\_\_\_\_ hours

- 2) What other activities related to your relative's ICU admission did you spend time on, and how much time did you spend on these activities?

| Activity<br><i>For example, visiting time, travel time, etc.</i> | Time per week (in hours) |
|------------------------------------------------------------------|--------------------------|
| 1. Visiting time                                                 | ___ __ hour              |
| 2. Travel time                                                   | ___ __ hour              |
| 3.                                                               | ___ __ hour              |
| 4.                                                               | ___ __ hour              |
| 5.                                                               | ___ __ hour              |
| 6.                                                               | ___ __ hour              |
| 7.                                                               | ___ __ hour              |
| 8.                                                               | ___ __ hour              |
| 9.                                                               | ___ __ hour              |
| 10.                                                              | ___ __ hour              |

- 3) To what extent were you concerned about your relative's mental health?

- Not at all
- A little
- Neutral
- Pretty much
- Very much

1  
2  
3 4) How concerned are you about your relative's cognitive recovery?

4  
5 *Thinking speed, memory, planning, understanding, etc.*

6  
7  Not at all

8  A little

9  Neutral (not much, not little)

10  Pretty much

11  Very much

12  
13  
14 5) How concerned were you about your relative's resumption of work?

15  
16  Not at all

17  A little

18  Neutral (not much, not little)

19  Pretty much

20  Very much

21  
22  
23 6) How concerned are you about your own mental health?

24  
25  Not at all

26  A little

27  Neutral

28  Pretty much

29  Very much

30  
31  
32  
33  
34 7) To what extent were you concerned about being able to carry out your own daily work?

35  
36  Not at all

37  A little

38  Neutral (not much, not little)

39  Pretty much

40  Very much

41  
42  
43 8) To what extent were you concerned about your financial situation as a result of your relative's  
44 Intensive Care Unit admission?

45  
46  Not at all

47  A little

48  Neutral (not much, not little)

49  Pretty much

50  Very much

1  
2  
3 9) To what extent were you concerned about the travel time spend to visit your relative in the  
4 Intensive Care Unit?  
5

- 6  
7  Not at all  
8  A little  
9  Neutral (not much, not little)  
10  Pretty much  
11  Very much  
12

13  
14 10) To what extent did you find it frightening to visit your relative in the Intensive Care Unit for  
15 the first time?  
16

- 17  Not at all  
18  A little  
19  Neutral (not much, not little)  
20  Pretty much  
21  Very much  
22  
23

24 11) Did you still find it frightening to visit your relative in the Intensive Care Unit?  
25

- 26  Not at all  
27  A little  
28  Neutral (not much, not little)  
29  Pretty much  
30  Very much  
31  
32

33  
34 12) To what extent were you concerned about supporting your family during your relative's  
35 Intensive Care Unit admission?  
36

- 37  Not at all  
38  A little  
39  Neutral (not much, not little)  
40  Pretty much  
41  Very much  
42  
43

44 13) To what extent were you concerned about the household during your relative's Intensive  
45 Care Unit admission?  
46

- 47  Not at all  
48  A little  
49  Neutral (not much, not little)  
50  Pretty much  
51  Very much  
52  
53  
54  
55  
56  
57  
58  
59  
60



1  
2  
3 14) To what extent were you concerned about the transfer from the Intensive Care Unit to the  
4 normal ward?  
5

- 6  
7  Not at all  
8  A little  
9  Neutral (not much, not little)  
10  Pretty much  
11  Very much  
12

13  
14 15) To what extent were you concerned about the necessary medical care for your relative after  
15 hospitalization?  
16

- 17  Not at all  
18  A little  
19  Neutral (not much, not little)  
20  Pretty much  
21  Very much  
22  
23

24 16) How was your night's sleep during your relative's Intensive Care Unit admission?  
25

- 26  Very bad  
27  Bad  
28  Neutral  
29  Good  
30  Very good  
31  
32

33  
34 17) To what extent did you feel responsible for the treatment of your relative?  
35

- 36  Not at all  
37  A little  
38  Neutral (not much, not little)  
39  Pretty much  
40  Very much  
41  
42

43 18) To what extent did you feel involved in the treatment of your relative?  
44

- 45  Not at all  
46  A little  
47  Neutral (not much, not little)  
48  Pretty much  
49  Very much  
50  
51  
52  
53  
54  
55  
56  
57  
58  
59  
60

# Reporting checklist for protocol of a clinical trial.

Based on the SPIRIT guidelines.

## Instructions to authors

Complete this checklist by entering the page numbers from your manuscript where readers will find each of the items listed below.

Your article may not currently address all the items on the checklist. Please modify your text to include the missing information. If you are certain that an item does not apply, please write "n/a" and provide a short explanation.

Upload your completed checklist as an extra file when you submit to a journal.

In your methods section, say that you used the SPIRIT reporting guidelines, and cite them as:

Chan A-W, Tetzlaff JM, Gøtzsche PC, Altman DG, Mann H, Berlin J, Dickersin K, Hróbjartsson A, Schulz KF, Parulekar WR, Krleža-Jerić K, Laupacis A, Moher D. SPIRIT 2013 Explanation and Elaboration: Guidance for protocols of clinical trials. *BMJ*. 2013;346:e7586

|                                             |                     | Reporting Item                                                                                               | Page Number |
|---------------------------------------------|---------------------|--------------------------------------------------------------------------------------------------------------|-------------|
| <b>Administrative information</b>           |                     |                                                                                                              |             |
| Title                                       | <a href="#">#1</a>  | Descriptive title identifying the study design, population, interventions, and, if applicable, trial acronym | 1           |
| Trial registration                          | <a href="#">#2a</a> | Trial identifier and registry name. If not yet registered, name of intended registry                         | 2           |
| Trial registration: data set                | <a href="#">#2b</a> | All items from the World Health Organization Trial Registration Data Set                                     | N/A         |
| Protocol version                            | <a href="#">#3</a>  | Date and version identifier                                                                                  | 2           |
| Funding                                     | <a href="#">#4</a>  | Sources and types of financial, material, and other support                                                  | 17          |
| Roles and responsibilities: contributorship | <a href="#">#5a</a> | Names, affiliations, and roles of protocol contributors                                                      | 17          |

|    |                           |                     |                                                                      |     |
|----|---------------------------|---------------------|----------------------------------------------------------------------|-----|
| 1  | Roles and                 | <a href="#">#5b</a> | Name and contact information for the trial sponsor                   | 1   |
| 2  | responsibilities:         |                     |                                                                      |     |
| 3  | sponsor contact           |                     |                                                                      |     |
| 4  | information               |                     |                                                                      |     |
| 5  |                           |                     |                                                                      |     |
| 6  |                           |                     |                                                                      |     |
| 7  |                           |                     |                                                                      |     |
| 8  | Roles and                 | <a href="#">#5c</a> | Role of study sponsor and funders, if any, in study design;          | 17  |
| 9  | responsibilities:         |                     | collection, management, analysis, and interpretation of data;        |     |
| 10 | sponsor and funder        |                     | writing of the report; and the decision to submit the report for     |     |
| 11 |                           |                     | publication, including whether they will have ultimate authority     |     |
| 12 |                           |                     | over any of these activities                                         |     |
| 13 |                           |                     |                                                                      |     |
| 14 |                           |                     |                                                                      |     |
| 15 |                           |                     |                                                                      |     |
| 16 | Roles and                 | <a href="#">#5d</a> | Composition, roles, and responsibilities of the coordinating centre, | 11  |
| 17 | responsibilities:         |                     | steering committee, endpoint adjudication committee, data            |     |
| 18 | committees                |                     | management team, and other individuals or groups overseeing the      |     |
| 19 |                           |                     | trial, if applicable (see Item 21a for data monitoring committee)    |     |
| 20 |                           |                     |                                                                      |     |
| 21 |                           |                     |                                                                      |     |
| 22 |                           |                     |                                                                      |     |
| 23 | <b>Introduction</b>       |                     |                                                                      |     |
| 24 |                           |                     |                                                                      |     |
| 25 | Background and            | <a href="#">#6a</a> | Description of research question and justification for undertaking   | 1-2 |
| 26 | rationale                 |                     | the trial, including summary of relevant studies (published and      |     |
| 27 |                           |                     | unpublished) examining benefits and harms for each intervention      |     |
| 28 |                           |                     |                                                                      |     |
| 29 |                           |                     |                                                                      |     |
| 30 | Background and            | <a href="#">#6b</a> | Explanation for choice of comparators                                | N/A |
| 31 | rationale: choice of      |                     |                                                                      |     |
| 32 | comparators               |                     |                                                                      |     |
| 33 |                           |                     |                                                                      |     |
| 34 |                           |                     |                                                                      |     |
| 35 |                           |                     |                                                                      |     |
| 36 | Objectives                | <a href="#">#7</a>  | Specific objectives or hypotheses                                    | 2   |
| 37 |                           |                     |                                                                      |     |
| 38 | Trial design              | <a href="#">#8</a>  | Description of trial design including type of trial (eg, parallel    | 6   |
| 39 |                           |                     | group, crossover, factorial, single group), allocation ratio, and    |     |
| 40 |                           |                     | framework (eg, superiority, equivalence, non-inferiority,            |     |
| 41 |                           |                     | exploratory)                                                         |     |
| 42 |                           |                     |                                                                      |     |
| 43 |                           |                     |                                                                      |     |
| 44 |                           |                     |                                                                      |     |
| 45 | <b>Methods:</b>           |                     |                                                                      |     |
| 46 | <b>Participants,</b>      |                     |                                                                      |     |
| 47 | <b>interventions, and</b> |                     |                                                                      |     |
| 48 | <b>outcomes</b>           |                     |                                                                      |     |
| 49 |                           |                     |                                                                      |     |
| 50 |                           |                     |                                                                      |     |
| 51 | Study setting             | <a href="#">#9</a>  | Description of study settings (eg, community clinic, academic        | 6   |
| 52 |                           |                     | hospital) and list of countries where data will be collected.        |     |
| 53 |                           |                     | Reference to where list of study sites can be obtained               |     |
| 54 |                           |                     |                                                                      |     |
| 55 |                           |                     |                                                                      |     |
| 56 |                           |                     |                                                                      |     |
| 57 | Eligibility criteria      | <a href="#">#10</a> | Inclusion and exclusion criteria for participants. If applicable,    | 6   |
| 58 |                           |                     | eligibility criteria for study centres and individuals who will      |     |
| 59 |                           |                     |                                                                      |     |
| 60 |                           |                     |                                                                      |     |

|    |                              |                                                                                            |     |
|----|------------------------------|--------------------------------------------------------------------------------------------|-----|
|    |                              | perform the interventions (eg, surgeons, psychotherapists)                                 |     |
| 1  |                              |                                                                                            |     |
| 2  |                              |                                                                                            |     |
| 3  | Interventions:               | <a href="#">#11a</a> Interventions for each group with sufficient detail to allow          | 6   |
| 4  | description                  | replication, including how and when they will be administered                              |     |
| 5  |                              |                                                                                            |     |
| 6  | Interventions:               | <a href="#">#11b</a> Criteria for discontinuing or modifying allocated interventions for a | N/A |
| 7  | modifications                | given trial participant (eg, drug dose change in response to harms,                        |     |
| 8  |                              | participant request, or improving / worsening disease)                                     |     |
| 9  |                              |                                                                                            |     |
| 10 |                              |                                                                                            |     |
| 11 | Interventions:               | <a href="#">#11c</a> Strategies to improve adherence to intervention protocols, and any    | N/A |
| 12 | adherence                    | procedures for monitoring adherence (eg, drug tablet return;                               |     |
| 13 |                              | laboratory tests)                                                                          |     |
| 14 |                              |                                                                                            |     |
| 15 |                              |                                                                                            |     |
| 16 | Interventions:               | <a href="#">#11d</a> Relevant concomitant care and interventions that are permitted or     | N/A |
| 17 | concomitant care             | prohibited during the trial                                                                |     |
| 18 |                              |                                                                                            |     |
| 19 |                              |                                                                                            |     |
| 20 |                              |                                                                                            |     |
| 21 | Outcomes                     | <a href="#">#12</a> Primary, secondary, and other outcomes, including the specific         | 8-9 |
| 22 |                              | measurement variable (eg, systolic blood pressure), analysis metric                        |     |
| 23 |                              | (eg, change from baseline, final value, time to event), method of                          |     |
| 24 |                              | aggregation (eg, median, proportion), and time point for each                              |     |
| 25 |                              | outcome. Explanation of the clinical relevance of chosen efficacy                          |     |
| 26 |                              | and harm outcomes is strongly recommended                                                  |     |
| 27 |                              |                                                                                            |     |
| 28 |                              |                                                                                            |     |
| 29 |                              |                                                                                            |     |
| 30 | Participant timeline         | <a href="#">#13</a> Time schedule of enrolment, interventions (including any run-ins       | 7   |
| 31 |                              | and washouts), assessments, and visits for participants. A                                 |     |
| 32 |                              | schematic diagram is highly recommended (see Figure)                                       |     |
| 33 |                              |                                                                                            |     |
| 34 |                              |                                                                                            |     |
| 35 |                              |                                                                                            |     |
| 36 | Sample size                  | <a href="#">#14</a> Estimated number of participants needed to achieve study               | 9   |
| 37 |                              | objectives and how it was determined, including clinical and                               |     |
| 38 |                              | statistical assumptions supporting any sample size calculations                            |     |
| 39 |                              |                                                                                            |     |
| 40 |                              |                                                                                            |     |
| 41 | Recruitment                  | <a href="#">#15</a> Strategies for achieving adequate participant enrolment to reach       | 7   |
| 42 |                              | target sample size                                                                         |     |
| 43 |                              |                                                                                            |     |
| 44 |                              |                                                                                            |     |
| 45 | <b>Methods: Assignment</b>   |                                                                                            |     |
| 46 | <b>of interventions (for</b> |                                                                                            |     |
| 47 | <b>controlled trials)</b>    |                                                                                            |     |
| 48 |                              |                                                                                            |     |
| 49 |                              |                                                                                            |     |
| 50 | Allocation: sequence         | <a href="#">#16a</a> Method of generating the allocation sequence (eg, computer-           | 7   |
| 51 | generation                   | generated random numbers), and list of any factors for                                     |     |
| 52 |                              | stratification. To reduce predictability of a random sequence,                             |     |
| 53 |                              | details of any planned restriction (eg, blocking) should be provided                       |     |
| 54 |                              | in a separate document that is unavailable to those who enrol                              |     |
| 55 |                              | participants or assign interventions                                                       |     |
| 56 |                              |                                                                                            |     |
| 57 |                              |                                                                                            |     |
| 58 |                              |                                                                                            |     |
| 59 |                              |                                                                                            |     |
| 60 |                              |                                                                                            |     |

|    |                        |                      |                                                                       |    |
|----|------------------------|----------------------|-----------------------------------------------------------------------|----|
| 1  | Allocation concealment | <a href="#">#16b</a> | Mechanism of implementing the allocation sequence (eg, central        | 7  |
| 2  | mechanism              |                      | telephone; sequentially numbered, opaque, sealed envelopes),          |    |
| 3  |                        |                      | describing any steps to conceal the sequence until interventions are  |    |
| 4  |                        |                      | assigned                                                              |    |
| 5  |                        |                      |                                                                       |    |
| 6  |                        |                      |                                                                       |    |
| 7  |                        |                      |                                                                       |    |
| 8  | Allocation:            | <a href="#">#16c</a> | Who will generate the allocation sequence, who will enrol             | 7  |
| 9  | implementation         |                      | participants, and who will assign participants to interventions       |    |
| 10 |                        |                      |                                                                       |    |
| 11 | Blinding (masking)     | <a href="#">#17a</a> | Who will be blinded after assignment to interventions (eg, trial      | 7  |
| 12 |                        |                      | participants, care providers, outcome assessors, data analysts), and  |    |
| 13 |                        |                      | how                                                                   |    |
| 14 |                        |                      |                                                                       |    |
| 15 |                        |                      |                                                                       |    |
| 16 |                        |                      |                                                                       |    |
| 17 | Blinding (masking):    | <a href="#">#17b</a> | If blinded, circumstances under which unblinding is permissible,      | 7  |
| 18 | emergency unblinding   |                      | and procedure for revealing a participant's allocated intervention    |    |
| 19 |                        |                      | during the trial                                                      |    |
| 20 |                        |                      |                                                                       |    |
| 21 |                        |                      |                                                                       |    |
| 22 | <b>Methods: Data</b>   |                      |                                                                       |    |
| 23 | <b>collection,</b>     |                      |                                                                       |    |
| 24 | <b>management, and</b> |                      |                                                                       |    |
| 25 | <b>analysis</b>        |                      |                                                                       |    |
| 26 |                        |                      |                                                                       |    |
| 27 |                        |                      |                                                                       |    |
| 28 |                        |                      |                                                                       |    |
| 29 | Data collection plan   | <a href="#">#18a</a> | Plans for assessment and collection of outcome, baseline, and other   | 9  |
| 30 |                        |                      | trial data, including any related processes to promote data quality   |    |
| 31 |                        |                      | (eg, duplicate measurements, training of assessors) and a             |    |
| 32 |                        |                      | description of study instruments (eg, questionnaires, laboratory      |    |
| 33 |                        |                      | tests) along with their reliability and validity, if known. Reference |    |
| 34 |                        |                      | to where data collection forms can be found, if not in the protocol   |    |
| 35 |                        |                      |                                                                       |    |
| 36 |                        |                      |                                                                       |    |
| 37 |                        |                      |                                                                       |    |
| 38 |                        |                      |                                                                       |    |
| 39 | Data collection plan:  | <a href="#">#18b</a> | Plans to promote participant retention and complete follow-up,        | 9  |
| 40 | retention              |                      | including list of any outcome data to be collected for participants   |    |
| 41 |                        |                      | who discontinue or deviate from intervention protocols                |    |
| 42 |                        |                      |                                                                       |    |
| 43 |                        |                      |                                                                       |    |
| 44 | Data management        | <a href="#">#19</a>  | Plans for data entry, coding, security, and storage, including any    | 9  |
| 45 |                        |                      | related processes to promote data quality (eg, double data entry;     |    |
| 46 |                        |                      | range checks for data values). Reference to where details of data     |    |
| 47 |                        |                      | management procedures can be found, if not in the protocol            |    |
| 48 |                        |                      |                                                                       |    |
| 49 |                        |                      |                                                                       |    |
| 50 |                        |                      |                                                                       |    |
| 51 | Statistics: outcomes   | <a href="#">#20a</a> | Statistical methods for analysing primary and secondary outcomes.     | 10 |
| 52 |                        |                      | Reference to where other details of the statistical analysis plan can |    |
| 53 |                        |                      | be found, if not in the protocol                                      |    |
| 54 |                        |                      |                                                                       |    |
| 55 |                        |                      |                                                                       |    |
| 56 | Statistics: additional | <a href="#">#20b</a> | Methods for any additional analyses (eg, subgroup and adjusted        | 10 |
| 57 | analyses               |                      | analyses)                                                             |    |
| 58 |                        |                      |                                                                       |    |
| 59 |                        |                      |                                                                       |    |
| 60 |                        |                      |                                                                       |    |

|    |                            |                      |                                                                         |       |
|----|----------------------------|----------------------|-------------------------------------------------------------------------|-------|
| 1  | Statistics: analysis       | <a href="#">#20c</a> | Definition of analysis population relating to protocol non-             | 10    |
| 2  | population and missing     |                      | adherence (eg, as randomised analysis), and any statistical methods     |       |
| 3  | data                       |                      | to handle missing data (eg, multiple imputation)                        |       |
| 4  |                            |                      |                                                                         |       |
| 5  |                            |                      |                                                                         |       |
| 6  | <b>Methods: Monitoring</b> |                      |                                                                         |       |
| 7  |                            |                      |                                                                         |       |
| 8  |                            |                      |                                                                         |       |
| 9  | Data monitoring:           | <a href="#">#21a</a> | Composition of data monitoring committee (DMC); summary of its          | N/A   |
| 10 | formal committee           |                      | role and reporting structure; statement of whether it is independent    |       |
| 11 |                            |                      | from the sponsor and competing interests; and reference to where        |       |
| 12 |                            |                      | further details about its charter can be found, if not in the protocol. |       |
| 13 |                            |                      | Alternatively, an explanation of why a DMC is not needed                |       |
| 14 |                            |                      |                                                                         |       |
| 15 |                            |                      |                                                                         |       |
| 16 |                            |                      |                                                                         |       |
| 17 | Data monitoring:           | <a href="#">#21b</a> | Description of any interim analyses and stopping guidelines,            | N/A   |
| 18 | interim analysis           |                      | including who will have access to these interim results and make        |       |
| 19 |                            |                      | the final decision to terminate the trial                               |       |
| 20 |                            |                      |                                                                         |       |
| 21 |                            |                      |                                                                         |       |
| 22 | Harms                      | <a href="#">#22</a>  | Plans for collecting, assessing, reporting, and managing solicited      | 11    |
| 23 |                            |                      | and spontaneously reported adverse events and other unintended          |       |
| 24 |                            |                      | effects of trial interventions or trial conduct                         |       |
| 25 |                            |                      |                                                                         |       |
| 26 |                            |                      |                                                                         |       |
| 27 |                            |                      |                                                                         |       |
| 28 | Auditing                   | <a href="#">#23</a>  | Frequency and procedures for auditing trial conduct, if any, and        | N/A   |
| 29 |                            |                      | whether the process will be independent from investigators and the      |       |
| 30 |                            |                      | sponsor                                                                 |       |
| 31 |                            |                      |                                                                         |       |
| 32 |                            |                      |                                                                         |       |
| 33 | <b>Ethics and</b>          |                      |                                                                         |       |
| 34 | <b>dissemination</b>       |                      |                                                                         |       |
| 35 |                            |                      |                                                                         |       |
| 36 |                            |                      |                                                                         |       |
| 37 | Research ethics            | <a href="#">#24</a>  | Plans for seeking research ethics committee / institutional review      | 6, 11 |
| 38 | approval                   |                      | board (REC / IRB) approval                                              |       |
| 39 |                            |                      |                                                                         |       |
| 40 |                            |                      |                                                                         |       |
| 41 | Protocol amendments        | <a href="#">#25</a>  | Plans for communicating important protocol modifications (eg,           | N/A   |
| 42 |                            |                      | changes to eligibility criteria, outcomes, analyses) to relevant        |       |
| 43 |                            |                      | parties (eg, investigators, REC / IRBs, trial participants, trial       |       |
| 44 |                            |                      | registries, journals, regulators)                                       |       |
| 45 |                            |                      |                                                                         |       |
| 46 |                            |                      |                                                                         |       |
| 47 | Consent or assent          | <a href="#">#26a</a> | Who will obtain informed consent or assent from potential trial         | 7     |
| 48 |                            |                      | participants or authorised surrogates, and how (see Item 32)            |       |
| 49 |                            |                      |                                                                         |       |
| 50 |                            |                      |                                                                         |       |
| 51 | Consent or assent:         | <a href="#">#26b</a> | Additional consent provisions for collection and use of participant     | N/A   |
| 52 | ancillary studies          |                      | data and biological specimens in ancillary studies, if applicable       |       |
| 53 |                            |                      |                                                                         |       |
| 54 |                            |                      |                                                                         |       |
| 55 | Confidentiality            | <a href="#">#27</a>  | How personal information about potential and enrolled participants      | 9     |
| 56 |                            |                      | will be collected, shared, and maintained in order to protect           |       |
| 57 |                            |                      | confidentiality before, during, and after the trial                     |       |
| 58 |                            |                      |                                                                         |       |
| 59 |                            |                      |                                                                         |       |
| 60 |                            |                      |                                                                         |       |

|    |                                             |                      |                                                                                                                                                                                                                                                                                     |     |
|----|---------------------------------------------|----------------------|-------------------------------------------------------------------------------------------------------------------------------------------------------------------------------------------------------------------------------------------------------------------------------------|-----|
| 1  | Declaration of interests                    | <a href="#">#28</a>  | Financial and other competing interests for principal investigators for the overall trial and each study site                                                                                                                                                                       | 17  |
| 2  |                                             |                      |                                                                                                                                                                                                                                                                                     |     |
| 3  |                                             |                      |                                                                                                                                                                                                                                                                                     |     |
| 4  |                                             |                      |                                                                                                                                                                                                                                                                                     |     |
| 5  | Data access                                 | <a href="#">#29</a>  | Statement of who will have access to the final trial dataset, and disclosure of contractual agreements that limit such access for investigators                                                                                                                                     | 9   |
| 6  |                                             |                      |                                                                                                                                                                                                                                                                                     |     |
| 7  |                                             |                      |                                                                                                                                                                                                                                                                                     |     |
| 8  |                                             |                      |                                                                                                                                                                                                                                                                                     |     |
| 9  |                                             |                      |                                                                                                                                                                                                                                                                                     |     |
| 10 | Ancillary and post trial care               | <a href="#">#30</a>  | Provisions, if any, for ancillary and post-trial care, and for compensation to those who suffer harm from trial participation                                                                                                                                                       | N/A |
| 11 |                                             |                      |                                                                                                                                                                                                                                                                                     |     |
| 12 |                                             |                      |                                                                                                                                                                                                                                                                                     |     |
| 13 |                                             |                      |                                                                                                                                                                                                                                                                                     |     |
| 14 | Dissemination policy: trial results         | <a href="#">#31a</a> | Plans for investigators and sponsor to communicate trial results to participants, healthcare professionals, the public, and other relevant groups (eg, via publication, reporting in results databases, or other data sharing arrangements), including any publication restrictions | 11  |
| 15 |                                             |                      |                                                                                                                                                                                                                                                                                     |     |
| 16 |                                             |                      |                                                                                                                                                                                                                                                                                     |     |
| 17 |                                             |                      |                                                                                                                                                                                                                                                                                     |     |
| 18 |                                             |                      |                                                                                                                                                                                                                                                                                     |     |
| 19 |                                             |                      |                                                                                                                                                                                                                                                                                     |     |
| 20 |                                             |                      |                                                                                                                                                                                                                                                                                     |     |
| 21 | Dissemination policy: authorship            | <a href="#">#31b</a> | Authorship eligibility guidelines and any intended use of professional writers                                                                                                                                                                                                      | N/A |
| 22 |                                             |                      |                                                                                                                                                                                                                                                                                     |     |
| 23 |                                             |                      |                                                                                                                                                                                                                                                                                     |     |
| 24 |                                             |                      |                                                                                                                                                                                                                                                                                     |     |
| 25 | Dissemination policy: reproducible research | <a href="#">#31c</a> | Plans, if any, for granting public access to the full protocol, participant-level dataset, and statistical code                                                                                                                                                                     | N/A |
| 26 |                                             |                      |                                                                                                                                                                                                                                                                                     |     |
| 27 |                                             |                      |                                                                                                                                                                                                                                                                                     |     |
| 28 | <b>Appendices</b>                           |                      |                                                                                                                                                                                                                                                                                     |     |
| 29 |                                             |                      |                                                                                                                                                                                                                                                                                     |     |
| 30 |                                             |                      |                                                                                                                                                                                                                                                                                     |     |
| 31 | Informed consent materials                  | <a href="#">#32</a>  | Model consent form and other related documentation given to participants and authorised surrogates                                                                                                                                                                                  | N/A |
| 32 |                                             |                      |                                                                                                                                                                                                                                                                                     |     |
| 33 |                                             |                      |                                                                                                                                                                                                                                                                                     |     |
| 34 |                                             |                      |                                                                                                                                                                                                                                                                                     |     |
| 35 | Biological specimens                        | <a href="#">#33</a>  | Plans for collection, laboratory evaluation, and storage of biological specimens for genetic or molecular analysis in the current trial and for future use in ancillary studies, if applicable                                                                                      | N/A |
| 36 |                                             |                      |                                                                                                                                                                                                                                                                                     |     |
| 37 |                                             |                      |                                                                                                                                                                                                                                                                                     |     |
| 38 |                                             |                      |                                                                                                                                                                                                                                                                                     |     |
| 39 |                                             |                      |                                                                                                                                                                                                                                                                                     |     |

40 The SPIRIT checklist is distributed under the terms of the Creative Commons Attribution License CC-BY-ND  
 41 3.0. This checklist was completed on 29. January 2021 using <https://www.goodreports.org/>, a tool made by the  
 42 [EQUATOR Network](#) in collaboration with [Penelope.ai](#)  
 43  
 44  
 45  
 46  
 47  
 48  
 49  
 50  
 51  
 52  
 53  
 54  
 55  
 56  
 57  
 58  
 59  
 60
